# Supplementary material for: Multi-locus genome-wide association analysis supports the role of glutamatergic synaptic transmission in the etiology of major depressive disorder
Source: PubMed Central journal article supplement — Transl Psychiatry. 2012 Nov 13;2(11):e184–. doi: 10.1038/tp.2012.95 (PMC3565768; doi:10.1038/tp.2012.95), 2012-11-13
Supplement: tp201295x1.pdf [file tp201295x1.pdf]

## **Multi-locus genome-wide association analysis supports the role of glutamatergic synaptic transmission in the etiology of major depressive disorder**

Phil H Lee, Roy H Perlis, Jae-Yoon Jung, Erroll Rueckert, Enda M Byrne, Richie Siburian, Stephen Haddad, Catherine E Mayerfeld, Andrew C Heath, Michele L Pergadia, Pamela AF Madden, Dorret I Boomsma, Brenda W Penninx, Pamela Sklar, Nicholas G Martin, Naomi R Wray, Shaun M Purcell, Jordan W Smoller

### **Correspondence to:**

Jordan W. Smoller, MD, ScD  
Psychiatric & Neurodevelopmental Genetics Unit  
Center for Human Genetic Research  
Simches Research Building  
185 Cambridge St.  
Boston, MA 02114  
Phone: 617-724-0835  
Fax: 617-643-3080  
Email: [jsmoller@hms.harvard.edu](mailto:jsmoller@hms.harvard.edu)

Table of Contents

| Supplementary Contents                                   | Page |
|----------------------------------------------------------|------|
| 1. Study samples<br>a. NESDA/NTR<br>b. QIMR<br>c. STAR*D | S-4  |
| 2. Genome-wide association analyses                      | S-8  |
| 3. Text-mining-based candidate gene set selection        | S-13 |
| 4. Interval-based gene set enrichment test               | S-77 |
| 5. MDD candidate genes                                   | S-84 |
| 6. Web resources                                         | S-85 |
| 7. Supplementary References                              | S-86 |

| Supplementary Tables                                                                                                                                 | Page |
|------------------------------------------------------------------------------------------------------------------------------------------------------|------|
| <b>Table S1.1</b> The summary of the number of genotyped subjects and SNPs for three GWAS datasets after passing data quality control and imputation | S-4  |
| <b>Table S2.1.</b> List of LD-independent associated regions and their index SNPs with meta analysis $p < 5 \times 10^{-5}$                          | S-8  |
| <b>Table S3.1</b> List of 187 MDD candidate genes                                                                                                    | S-13 |
| <b>Table S3.2.</b> Functional relationship analysis results from GRAIL for MDD candidate genes                                                       | S-20 |
| <b>Table S3.3.</b> List of 152 GO gene sets compiled based on GRAIL functional keywords for MDD                                                      | S-68 |
| <b>Table S4.1.</b> Enrichment analysis results of top 30 target gene sets                                                                            | S-78 |
| <b>Table S5.1.</b> Statistics of MDD candidate genes                                                                                                 | S-84 |

| <b>Supplementary Figures</b>                                                                                                                                     | <b>Page</b> |
|------------------------------------------------------------------------------------------------------------------------------------------------------------------|-------------|
| <b>Figure S2.1.</b> Manhattan plots of all SNPs from the meta analysis that passed QC for all of the NESDA/NTR, STAR*D, and QIMR samples                         | S-11        |
| <b>Figure S2.2.</b> Quantile-quantile plots of all SNPs from the association analyses of the NESDA/NTR, STAR*D, and QIMR samples, and the combined meta analysis | S-12        |

**S1. Study Samples**

**Table S1.1.** The summary of the number of genotyped subjects and SNPs for three GWAS datasets after passing data quality control and imputation

|              |           |          | NESDA/NTR | QIMR      | STAR*D    | Total |
|--------------|-----------|----------|-----------|-----------|-----------|-------|
| Subjects (N) | All       | cases    | 1,673     | 1,450     | 1,223     | 4,346 |
|              |           | controls | 1,757     | 1,703     | 970       | 4,430 |
|              | Males     | cases    | 512       | 518       | 511       | 1,541 |
|              |           | controls | 670       | 715       | 525       | 1,910 |
|              | Females   | cases    | 1,161     | 932       | 712       | 2,805 |
|              |           | controls | 1,087     | 988       | 445       | 2,520 |
| SNPs (N)     | Genotyped |          | 404,891   | 270,799   | 284,889   |       |
|              | Imputed   |          | 1,944,531 | 1,872,130 | 1,655,514 |       |

**A. NESDA/NTR<sup>(1, 2)</sup>**

**Overview**

This NESDA/NTR project was comprised of two large-scale nationwide biological collection studies: the Netherlands Twin Register (NTR) and the Netherlands Study of Depression and Anxiety (NESDA). Within these studies, The National Institute of Health Genetic Association Information Network selected 1,862 MDD cases and 1,857 psychiatry-screened controls for genome-wide genotyping.

**Subject Recruitment and Inclusion Criteria**

**Cases:** Depressed subjects (cases) were mostly derived from NESDA. Participants were recruited from September 2004 through February 2007 through mental health organizations, primary care practitioners and community samples from seven outpatient regional facilities in the Netherlands. Additional cases were included from population-based cohorts NEMESIS, ARIADNE, and NTR. Inclusion criteria, described in detail in the original publication, were a lifetime diagnosis of DSM-IV MDD as diagnosed through the CIDI psychiatric interview, an age between 18 and 65 years and self-reported western European ancestry. Participants not fluent in Dutch and those with a primary diagnosis of schizophrenia or schizoaffective disorder, obsessive compulsive disorder, bipolar disorder or severe substance use dependence were excluded.

**Controls:** Control subjects were mainly derived from NTR. The majority of families were recruited through the city council registration system. Inclusion required availability of both survey data and biological samples. Controls never scored more than 0.65 on a general factor score for anxious depression and never reported a history of MDD in any survey or at the blood-sampling visit. Controls and their parents were born in the Netherlands or western Europe. Eligible controls in a family were matched on sex and age. Only biologically unrelated samples were selected. Additional controls collected from NESDA required no lifetime diagnosis MDD or anxiety disorder assessed by the CIDI and reported low depressive symptoms at baseline.

### Genotyping

Perlegen Sciences conducted individual genotyping using SNPs selected to tag common variation in the HapMap European and Asian panels. Cases and controls were randomly allocated to plates and to positions within plates to blind case-control status. HapMap CEU samples were also plated for quality control.

### Quality Control

**Samples:** There were a total of 3,820 Dutch samples sent to Perlegen for genotyping. A total of 104 samples were excluded for the following reasons: 59 did not have GWAS data, 39 had uncertain genotype and phenotype links, 7 had evidence of contamination, 6 failed genotyping, 7 had miscellaneous failures, 8 had missing genotype data of >25%, 1 had high genome-wide homozygosity, 38 had genome-wide estimates consistent with first- or second-degree relationship, and 57 were excluded due to genetic ancestry. The final analysis dataset included 1,738 cases and 1,802 controls.

**SNPs:** The unfiltered dataset contained 599,156 unique SNPs. The following quality control thresholds were used to exclude SNPs from the final analysis dataset: >2 genotype disagreements in 40 duplicated samples, >2 Mendelian inheritance errors in 38 complete trio samples, minor allele frequency <0.01, or >0.05 missing genotypes in either cases or controls. A final set of 435,291 SNPs was used in the analysis dataset.

## B. STAR\*D<sup>(3-5)</sup>

### Overview

The Sequenced Treatment Alternative to Relieve Depression (STAR\*D) study is a nationwide public health clinical trial to determine the effectiveness of different treatments for people with Major Depressive Disorder (MDD). The NIH National Institute of Mental Health funded a genome-wide association study (GWAS) of MDD in 1,221 cases from this study.

### Subject Recruitment and Inclusion Criteria

**Cases:** Cases were participants in STAR\*D and were enrolled from primary care of psychiatric outpatient clinics. Clinician rating of Diagnostic and Statistical Manual of Mental Disorders, 4th edition criteria, determined MDD diagnosis. Out of the 1,953 participants who donated DNA, 1,500 participants that self-identified as “white” were selected for genotyping.

**Controls:** Control subjects were collected by Knowledge Networks, a survey and market research company whose panel contains approximately 60,000 households representative of the U.S. population. Subjects completed an online psychiatric screen that included questions regarding demographics, ancestry, and DSM-IV criteria for a range of psychiatric disorders. Participants who reported a history of schizophrenia, psychosis, or bipolar disorder were excluded from the GWAS analyses, as previously described<sup>(6)</sup>. We also excluded individuals (N=126) who met criteria for a history of major depressive episode.

### Genotyping

**Cases:** Genotyping was conducted for 754 cases by Affymetrix, Inc. using the Affymetrix GeneChip Human Mapping 500K Array Set. The remaining 746 cases were genotyped using the Affymetrix Genome-Wide Human SNP 5.0 Array. There were 500,568 SNPs that were assayed by both arrays.

**Controls:** The NIMH controls were genotyped at the Broad Institute on the Affymetrix Genome-Wide Human SNP 6.0 Array.

### Quality Control Analysis

**Cases:** Pair-wise estimates of identity-by descent detected and removed 3 duplicates and 21 samples with estimates consistent with first- or second-degree relatives. Multidimensional scaling analysis removed 230 samples that were outliers to the main European-ancestry cluster. Cases that had ambiguous gender (N=20) or missingness rates of >5% were also removed. The final dataset for analysis had 1,223 cases.

**Controls:** Control samples were excluded for the following reasons: genotype missingness rate >5%, inconsistency in self-reported gender and genotypic gender, outliers for mean heterozygosity across genotypes, outliers to the main European-ancestry cluster, and high estimates consistent with first- or second-degree relatives (the sample with the best call rate was retained).

**SNPs:** SNPs were excluded if they had a call rate <95%, had a minor allele frequency <1%, were inconsistent with Hardy-Weinberg equilibrium at a p value of  $<1 \times 10^{-6}$ , or showed significantly different rates of missingness in patients and control subjects.

### C. QIMR

**Overview:** MDD cases and controls were identified as part of a number of community-based epidemiological surveys carried out at the Queensland Institute of Medical Research between 1992 and 2006. Adult twins and their families were recruited through the Australian Twin Registry (ATR, <http://www.twins.org.au>) under collaborative grant funding to QIMR and the Washington University in St. Louis.

#### Subject Recruitment and Inclusion Criteria

**Cases:** MDD cases were identified through psychiatric questionnaires, either the shortened Composite International Diagnostic Interview<sup>16</sup> or the SSAGA-OZ interview instrument (a version of the Semi-Structured Assessment for the Genetics of Alcoholism modified for use in Australia), a comprehensive psychiatric interview designed to assess MDD and other psychiatric disorders<sup>17</sup> according to DSM-III-R and DSM-IV criteria. Structured interviews were administered by trained telephone interviewers, closely supervised by a clinical psychologist. All cases and controls were unrelated. Early-onset and recurrent MDD cases were prioritised for genotyping.

**Controls:** Unrelated controls were selected as genotyped individuals from families in which no individuals qualified for diagnoses of MDD or anxiety disorders. If multiple controls were available from a family, the individual with the lowest neuroticism score was preferentially selected, otherwise an individual was selected at random.

**Genotyping:** Both cases and controls were genotyped as part of a number of genotyping projects from the Queensland Institute of Medical Research, described in detail in ref<sup>(7)</sup>. Depending upon the project, subjects were genotyped either on the Illumina 317K, 370K or 610K project. In addition, a further genotyping project using the Illumina 610K platform was carried out at the University of Queensland, Brisbane, Australia. In total, 433 cases and 747 controls were genotyped on the Illumina 610K platform, 906 cases and 765 controls were genotyped on the Illumina 370K platform, and 111 cases and 191 controls were genotyped on the Illumina 317K platform.

#### **Quality Control**

The QIMR samples genotyped on Illumina platforms are described in detail in Medland et al<sup>(8)</sup> (see their Table 2 projects 1-4,6). The Illumina platforms corresponding to the I317, I370 and I610 sample sets are the Illumina 317k, Illumina HumanCNV370-Quadv3 and the Illumina Human610-Quad respectively. QC steps for each project<sup>(8)</sup> included rejection of SNPs with Bead Studio Gen Call Scores < 0.7, SNP call rate < 0.95, Hardy Weinberg Equilibrium (HWE) test  $p < 10^{-6}$ , and SNPs with minor allele frequency (MAF) < 0.01. The different genotyping projects included overlapping individuals and families. After merging of the QIMR Illumina projects, the data were screened for missingness within individuals (removal of individuals where > 0.05 of genotyped SNPs failed), pedigree, sex errors, and Mendelian errors (genotypes for all family members for a given SNP were removed on detection of errors). Ancestry outliers were detected using Principal Components Analysis as described in ref.<sup>(8)</sup> Non-European ancestry outliers were removed. 11 individuals (4 cases and 7 controls) were dropped from the present analysis due to being ancestry outliers removed.

## **S2. Genome-wide association analyses**

### **a. Association analyses of individual datasets and meta analysis**

PLINK was used to conduct single-SNP based logistic regression of imputed allele dosage within individual samples (i.e., NESDA/NTR, QIMR, and STAR\*D). To control for potential population sub-stratification, 10 multi-dimensional scaling (MDS) analysis components were calculated using PLINK. The first 4 MDS components showed inflated association with genetic data, and thus, were included as covariates in regression analysis. Meta analysis was conducted using the fixed effect model on the dosage analysis results from the three datasets using PLINK. Figures S2.1 and S2.2 show the QQ plot and the Manhattan plot of the meta analysis results. We list the LD-clumped top associated regions from the meta analysis in Table S2.1. PLINK LD-clumping options were set as follows:  $\text{clump-}p1=1 \times 10^{-4}$ ;  $\text{clump-}p2=5 \times 10^{-2}$ ;  $\text{clump-}r2=0.5$ ;  $\text{clump-range-border}=20\text{kb}$ .



**Table S2.1.** List of LD-independent associated regions and their index SNPs with meta analysis  $p < 5 \times 10^{-5}$

| SNP        | Chr | BP        | Alleles | Freq  | P        | No  | Region                     | Gene                    |
|------------|-----|-----------|---------|-------|----------|-----|----------------------------|-------------------------|
| rs12511906 | 4   | 108325293 | A/G     | 0.442 | 1.95E-06 | 8   | chr4:108297821..108334671  |                         |
| rs9572198  | 13  | 69075552  | T/G     | 0.220 | 2.89E-06 | 21  | chr13:68947049..69089324   |                         |
| rs13076653 | 3   | 72738405  | T/C     | 0.192 | 4.16E-06 | 16  | chr3:72737330..72761817    |                         |
| rs12472043 | 2   | 20120319  | A/G     | 0.275 | 5.19E-06 | 4   | chr2:20118496..20125166    | LAPTM4A                 |
| rs299070   | 3   | 22880899  | A/G     | 0.390 | 1.08E-05 | 5   | chr3:22863568..22890945    |                         |
| rs9826609  | 3   | 128486662 | C/T     | 0.358 | 1.16E-05 | 3   | chr3:128471629..128489278  |                         |
| rs4433181  | 8   | 116089963 | G/A     | 0.246 | 1.20E-05 | 19  | chr8:115938333..116102491  |                         |
| rs5756670  | 2   | 1740503   | G/A     | 0.300 | 1.36E-05 | 19  | chr2:1725147..1758267      | PXDN,MYT1L              |
| rs526410   | 18  | 64006571  | A/C     | 0.300 | 1.71E-05 | 5   | chr18:64004151..64011906   |                         |
| rs2126551  | 2   | 20133508  | G/A     | 0.442 | 2.17E-05 | 2   | chr2:20101557..20133508    | LAPTM4A                 |
| rs7778252  | 7   | 147225029 | T/C     | 0.333 | 2.26E-05 | 14  | chr7:147164200..147238300  | CNTNAP2                 |
| rs10811962 | 9   | 23718372  | G/A     | 0.242 | 2.95E-05 | 12  | chr9:23710904..23731278    | ELAVL2                  |
| rs11061558 | 12  | 130536259 | G/A     | 0.119 | 3.26E-05 | 37  | chr12:130426315..130576020 |                         |
| rs4671840  | 2   | 67774720  | A/G     | 0.342 | 3.30E-05 | 39  | chr2:67726248..67829090    |                         |
| rs2893208  | 7   | 25447455  | C/G     | 0.127 | 3.54E-05 | 5   | chr7:25447455..25480258    |                         |
| rs9640436  | 7   | 144414456 | T/C     | 0.425 | 3.92E-05 | 26  | chr7:144333510..144458065  |                         |
| rs4853645  | 2   | 192412289 | T/A     | 0.142 | 4.17E-05 | 2   | chr2:192412289..192420968  | SDPR                    |
| rs9888252  | 11  | 11464356  | A/G     | 0.308 | 4.55E-05 | 9   | chr11:11452928..11511622   | GALNTL4                 |
| rs7296488  | 12  | 33299486  | T/C     | 0.042 | 4.58E-05 | 28  | chr12:33299187..33326851   |                         |
| rs1848502  | 5   | 54358233  | G/C     | 0.254 | 4.63E-05 | 7   | chr5:54337165..54360391    | GZMK,ESM1               |
| rs9468537  | 6   | 11281807  | T/C     | 0.184 | 4.69E-05 | 27  | chr6:11256335..11332097    | NEDD9                   |
| rs581190   | 3   | 62821149  | G/A     | 0.458 | 5.14E-05 | 11  | chr3:62739912..62821149    | CADPS                   |
| rs1538187  | 13  | 97312242  | G/A     | 0.483 | 5.17E-05 | 1   | chr13:97312242..97312242   |                         |
| rs12553567 | 9   | 31155966  | T/A     | 0.348 | 5.55E-05 | 35  | chr9:31155455..31265261    |                         |
| rs1929496  | 9   | 103306774 | C/A     | 0.133 | 5.87E-05 | 6   | chr9:103306774..103379633  | RNF20,PPP3R2,<br>GRIN3A |
| rs1578022  | 1   | 73716865  | C/G     | 0.400 | 5.93E-05 | 155 | chr1:73501776..73760737    |                         |
| rs1738519  | 6   | 78168499  | A/C     | 0.025 | 6.07E-05 | 44  | chr6:78115449..78193405    |                         |
| rs10069878 | 5   | 59267987  | T/C     | 0.288 | 6.34E-05 | 32  | chr5:59176633..59338351    | PDE4D                   |
| rs1587504  | 12  | 98549289  | T/C     | 0.333 | 6.34E-05 | 14  | chr12:98519837..98563287   | FAM71C,ANKS1B           |
| rs12140791 | 1   | 160357908 | T/C     | 0.042 | 6.38E-05 | 2   | chr1:160355955..160357908  | NOS1AP                  |
| rs883673   | 12  | 130499303 | G/C     | 0.125 | 6.55E-05 | 11  | chr12:130497296..130506169 |                         |
| rs13330951 | 16  | 68121343  | A/G     | 0.475 | 7.60E-05 | 12  | chr16:68114084..68292772   | NQO1,NFAT5              |
| rs7242423  | 18  | 48445999  | G/A     | 0.042 | 8.00E-05 | 27  | chr18:48445999..48621846   | DCC                     |
| rs1482463  | 6   | 64647424  | T/C     | 0.342 | 8.13E-05 | 35  | chr6:64409318..64659477    | PHF3                    |
| rs9870680  | 3   | 7504555   | T/C     | 0.442 | 8.37E-05 | 35  | chr3:7504555..7560070      | GRM7                    |
| rs9268858  | 6   | 32537736  | C/T     | 0.392 | 8.59E-05 | 39  | chr6:32449451..32759095    | HLA-DRB1,many           |

|            |    |           |     |       |          |    |                           |                    |
|------------|----|-----------|-----|-------|----------|----|---------------------------|--------------------|
| rs12498707 | 4  | 108316567 | A/C | 0.375 | 8.64E-05 | 4  | chr4:108300383..108334471 |                    |
| rs11719917 | 3  | 127461430 | A/G | 0.034 | 8.64E-05 | 1  | chr3:127461430..127461430 |                    |
| rs13410433 | 2  | 123751993 | A/G | 0.317 | 9.09E-05 | 17 | chr2:123699703..123852415 |                    |
| rs1054897  | 5  | 61719717  | G/A | 0.067 | 9.12E-05 | 20 | chr5:61588569..61913931   | KIF2A,IPO11,DIMT1L |
| rs1570675  | 13 | 42304556  | T/C | 0.466 | 9.16E-05 | 3  | chr13:42304556..42337468  |                    |
| rs2108533  | 17 | 66597705  | A/G | 0.408 | 9.42E-05 | 6  | chr17:66587759..66597705  |                    |
| rs12875723 | 13 | 48156470  | A/G | 0.397 | 9.69E-05 | 15 | chr13:48099041..48181769  | CYSLTR2            |
| rs16894602 | 4  | 16802749  | G/C | 0.136 | 9.85E-05 | 22 | chr4:16671932..16828350   |                    |
| rs17407838 | 1  | 163799370 | A/T | 0.140 | 9.94E-05 | 21 | chr1:163793417..163865619 | MGST3,LRRC52       |

**Abbreviations** Chr: chromosome; BP: base pair position; Freq: minor allele frequency in HapMap II; Alleles: minor allele/major allele; P: meta analysis association  $p$ -value; No: number of SNPs in the clumped region with meta analysis  $p < 5 \times 10^{-2}$ ; Region: genomic regions of clumped SNPs; Gene: list of genes overlapping with LD-clumped regions including 20k up/downstream of genic regions.

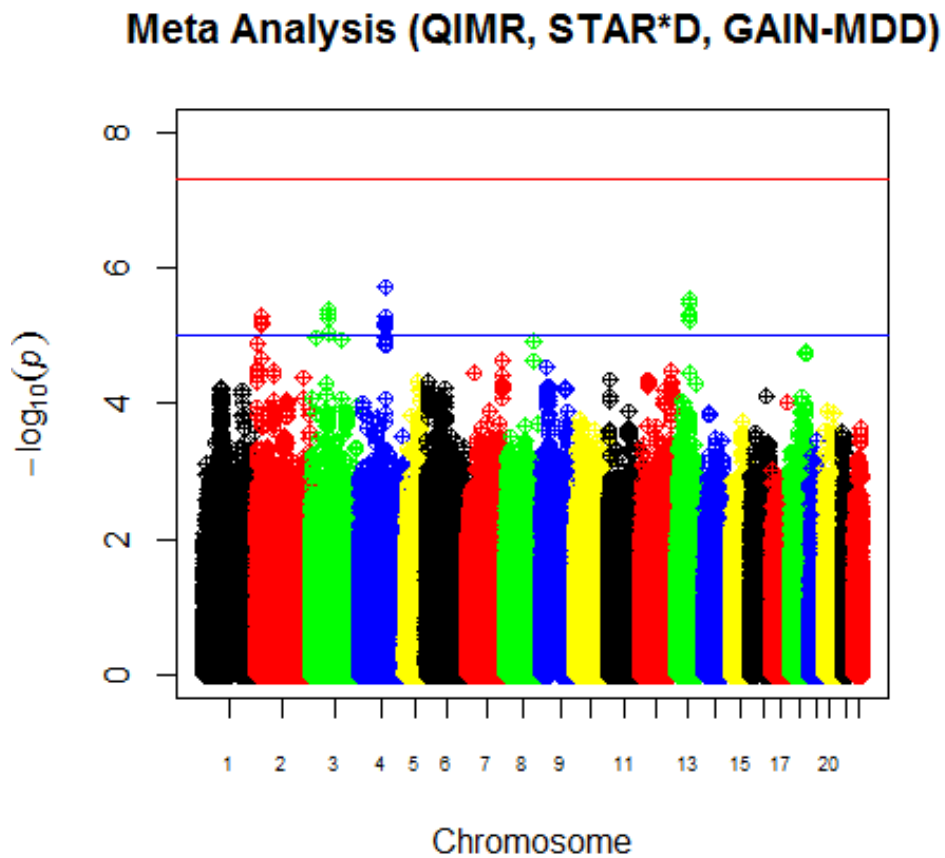

**Figure S2.1.** Manhattan plots of all SNPs from the meta analysis that passed QC for all of the NESDA/NTR, STAR\*D, and QIMR samples.

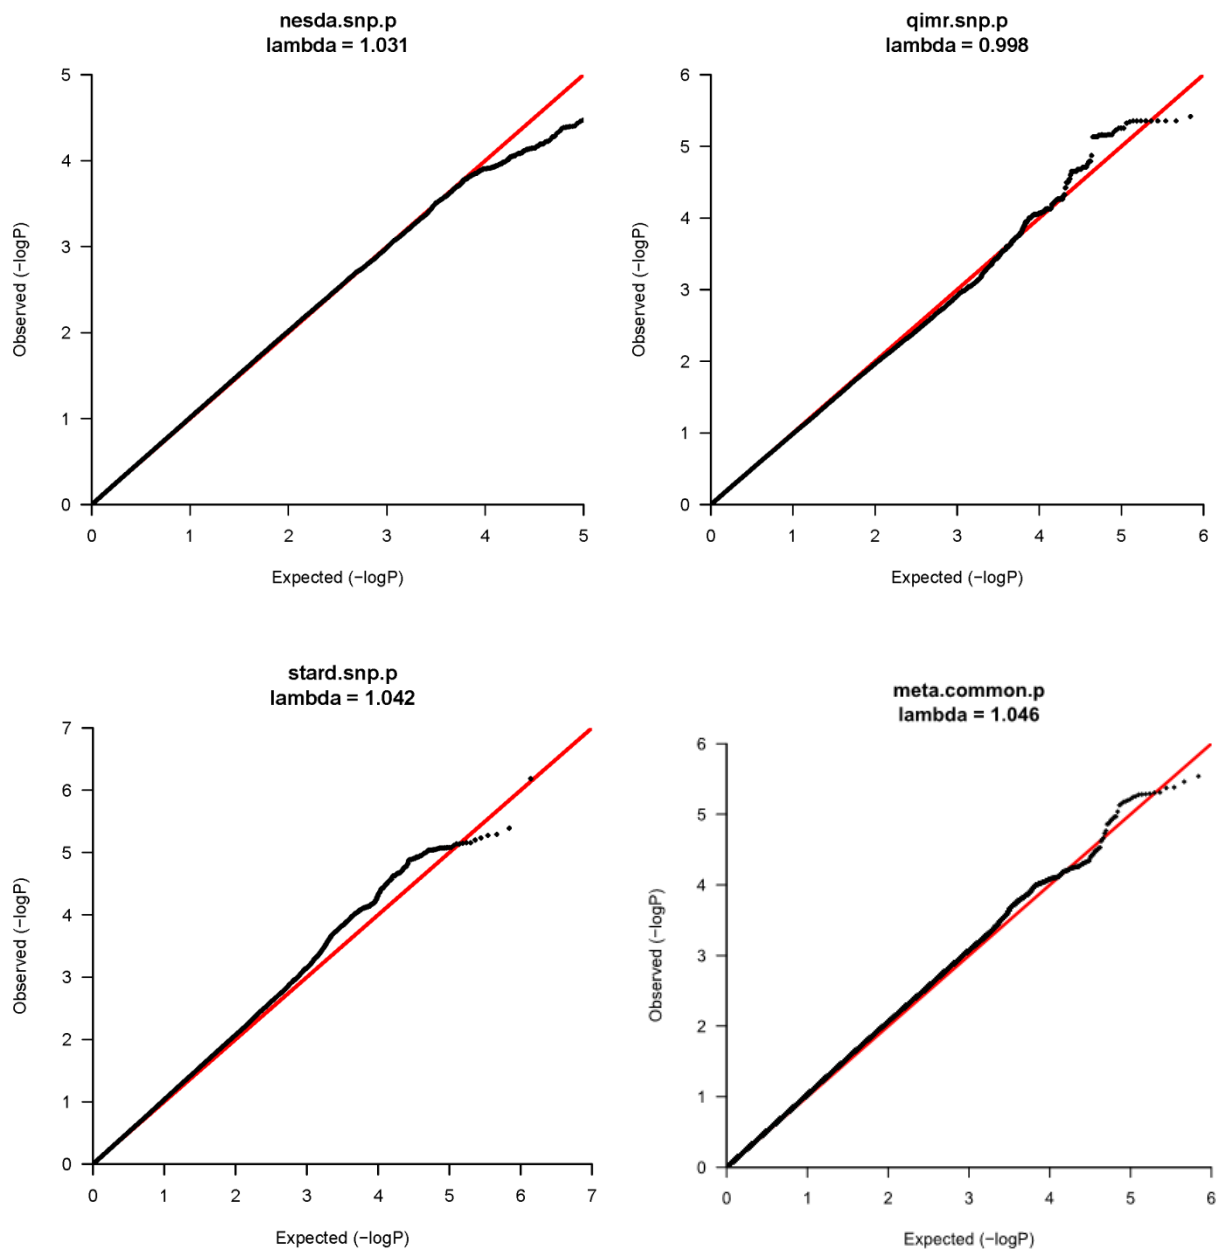

**Figure S2.2.** Quantile-quantile plots of SNPs from the association analyses of the NESDA/NTR, STAR\*D, and QIMR samples, and the combined meta analysis. The genomic control inflation factors  $\lambda$ s are 1.031, 0.998, 1.042, and 1.046 for NESDA/NTR, QIMR, STAR\*D, and the meta analysis. The number of cases is 4,349 and the number of controls is 4,298. The  $\lambda$  rescaled to a sample size of 1,000 cases and 1,000 controls are 1.018, 0.999, 1.038, and 1.011 for NESDA/NTR ( $n=1,738/1,802$ ), QIMR ( $n=1,450/1,703$ ), STAR\*D ( $n=1,223/970$ ), and the meta analysis ( $n=4,349/4,298$ ), respectively.

### S3. Candidate Gene Set Collection

**Table S3.1** List of 188 MDD candidate genes collected from Bosker et al.<sup>(9)</sup>, Lewis et al.<sup>(10)</sup>, Shyn et al.<sup>(3)</sup>, Muglia et al.<sup>(11)</sup>, and Wray et al.<sup>(7)</sup> The number of genes from each study is shown in Table S5.1. This table shows the list of 188 unique genes gathered from the aforementioned five studies.

| Symbol  | Name                                                         | Synonyms                                              | Locus           | Entrez ID |
|---------|--------------------------------------------------------------|-------------------------------------------------------|-----------------|-----------|
| ABCB1   | ATP-binding cassette, sub-family B (MDR/TAP), member 1       | CD243, GP170, ABC20                                   | 7q21.12         | 5243      |
| ACE     | angiotensin I converting enzyme (peptidyl-dipeptidase A) 1   | ACE1, CD143                                           | 17q23.3         | 1636      |
| ACSL4   | acyl-CoA synthetase long-chain family member 4               | ACS4, LACS4                                           | Xq22.3-q23      | 2182      |
| ADCY9   | adenylate cyclase 9                                          | AC9                                                   | 16p13.3         | 115       |
| ADORA2A | adenosine A2a receptor                                       | RDC8                                                  | 22q11.23        | 135       |
| ADRA1A  | adrenergic, alpha-1A-, receptor                              | ADRA1L1                                               | 8p21.2          | 148       |
| ADRA1B  | adrenergic, alpha-1B-, receptor                              | n/a                                                   | 5q33.3          | 147       |
| ADRA2A  | adrenergic, alpha-2A-, receptor                              | ADRAR                                                 | 10q24-q26       | 150       |
| ADRA2B  | adrenergic, alpha-2B-, receptor                              | ADRARL1                                               | 2q11.1          | 151       |
| ADRA2C  | adrenergic, alpha-2C-, receptor                              | ADRARL2                                               | 4p16.3          | 152       |
| ADRB1   | adrenergic, beta-1-, receptor                                | n/a                                                   | 10q24-q26       | 153       |
| AGTR1   | angiotensin II receptor, type 1                              | AT1, AT2R1, AGTR1A, AT2R1A, HAT1R, AG2S, AT2R1B, AT1B | 3q24            | 185       |
| AKT1    | v-akt murine thymoma viral oncogene homolog 1                | RAC, PKB, PRKBA, AKT                                  | 14q32.32-q32.33 | 207       |
| ANK3    | ankyrin 3, node of Ranvier (ankyrin G)                       | n/a                                                   | 10q21           | 288       |
| APOE    | apolipoprotein E                                             | n/a                                                   | 19q13.31        | 348       |
| AR      | androgen receptor                                            | AIS, NR3C4, SMAX1, HUMARA                             | Xq12            | 367       |
| AVPR1A  | arginine vasopressin receptor 1A                             | n/a                                                   | 12q14-q15       | 552       |
| AVPR1B  | arginine vasopressin receptor 1B                             | n/a                                                   | 1q32            | 553       |
| BCR     | breakpoint cluster region                                    | D22S662, CML, PHL, ALL                                | 22q11           | 613       |
| BDNF    | brain-derived neurotrophic factor                            | n/a                                                   | 11p14.1         | 627       |
| C5orf20 | chromosome 5 open reading frame 20                           | DCNP1                                                 | 5q31.1          | 140947    |
| CACNA1C | calcium channel, voltage-dependent, L type, alpha 1C subunit | Cav1.2, CACH2, CACN2, TS                              | 12p13.3         | 775       |
| CAMKK2  | calcium/calmodulin-dependent protein kinase kinase 2, beta   | CAMKK, KIAA0787, CAMKKB, MGC15254                     | 12q24.2         | 10645     |
| CCK     | cholecystokinin                                              | n/a                                                   | 3pter-p21       | 885       |

|          |                                                                                                                                |                                                  |               |        |
|----------|--------------------------------------------------------------------------------------------------------------------------------|--------------------------------------------------|---------------|--------|
| CCKAR    | cholecystokinin A receptor                                                                                                     | n/a                                              | 4             | 886    |
| CCKBR    | cholecystokinin B receptor                                                                                                     | n/a                                              | 11p15.4       | 887    |
| CCL2     | chemokine (C-C motif) ligand 2                                                                                                 | MCP1, MCP-1, MCAF, SMC-CF, GDCF-2, HC11, MGC9434 | 17q11.2-q21.1 | 6347   |
| CCND2    | cyclin D2                                                                                                                      | n/a                                              | 12p13         | 894    |
| CD3E     | CD3e molecule, epsilon (CD3-TCR complex)                                                                                       | n/a                                              | 11q23         | 916    |
| CD47     | CD47 molecule                                                                                                                  | IAP, OA3                                         | 3q13.1-q13.2  | 961    |
| CHRFAM7A | CHRNA7 (cholinergic receptor, nicotinic, alpha 7, exons 5-10) and FAM7A (family with sequence similarity 7A, exons A-E) fusion | D-10, CHRNA7-DR1                                 | 15q13.2       | 89832  |
| CHRM2    | cholinergic receptor, muscarinic 2                                                                                             | n/a                                              | 7q35-q36      | 1129   |
| CHRNA7   | cholinergic receptor, nicotinic, alpha 7                                                                                       | n/a                                              | 15q13.3       | 1139   |
| CHST11   | carbohydrate (chondroitin 4) sulfotransferase 11                                                                               | C4ST1, C4St-1, C4ST, HSA269537                   | 12q23.3       | 50515  |
| CLOCK    | clock homolog (mouse)                                                                                                          | KIAA0334, KAT13D, bHLHe8                         | 4q12          | 9575   |
| CNR1     | cannabinoid receptor 1 (brain)                                                                                                 | CB1K5, CB-R, CB1, CANN6, CB1A                    | 6q14-q15      | 1268   |
| CNTF     | ciliary neurotrophic factor                                                                                                    | HCNTF                                            | 11q12         | 1270   |
| COMT     | catechol-O-methyltransferase                                                                                                   | n/a                                              | 22q11.21      | 1312   |
| CREB1    | cAMP responsive element binding protein 1                                                                                      | n/a                                              | 2q34          | 1385   |
| CRHBP    | corticotropin releasing hormone binding protein                                                                                | CRF-BP, CRFBP                                    | 5q            | 1393   |
| CRHR1    | corticotropin releasing hormone receptor 1                                                                                     | CRF-R, CRF1                                      | 17q12-q22     | 1394   |
| CRHR2    | corticotropin releasing hormone receptor 2                                                                                     | CRF2, CRF-RB, HM-CRF                             | 7p21-p15      | 1395   |
| CTLA4    | cytotoxic T-lymphocyte-associated protein 4                                                                                    | CD152, CD, GSE, CD28, ICOS                       | 2q33          | 1493   |
| CYP2C9   | cytochrome P450, family 2, subfamily C, polypeptide 9                                                                          | P450IIC9                                         | 10q24.1       | 1559   |
| DAOA     | D-amino acid oxidase activator                                                                                                 | G72                                              | 13q33.2       | 267012 |
| DDC      | dopa decarboxylase (aromatic L-amino acid decarboxylase)                                                                       | AADC                                             | 7p11          | 1644   |
| DGKH     | diacylglycerol kinase, eta                                                                                                     | DGKeta                                           | 13q13.3       | 160851 |
| DISC1    | disrupted in schizophrenia 1                                                                                                   | n/a                                              | 1q42.1        | 27185  |
| DNAJB2   | DnaJ (Hsp40) homolog, subfamily B, member 2                                                                                    | HSPF3                                            | 2q32-q34      | 3300   |
| DRD1     | dopamine receptor D1                                                                                                           | n/a                                              | 5q34-q35      | 1812   |
| DRD2     | dopamine receptor D2                                                                                                           | n/a                                              | 11q22-q23     | 1813   |
| DRD3     | dopamine receptor D3                                                                                                           | n/a                                              | 3q13.3        | 1814   |
| DRD4     | dopamine receptor D4                                                                                                           | n/a                                              | 11p15.5       | 1815   |
| DRD5     | dopamine receptor D5                                                                                                           | DRD1B                                            | 4p16.1        | 1816   |
| DTNBP1   | dystrobrevin binding protein 1                                                                                                 | Dysbindin, My031, HPS7, DBND                     | 6p22.3        | 84062  |

|        |                                                                                                       |                                               |                 |       |
|--------|-------------------------------------------------------------------------------------------------------|-----------------------------------------------|-----------------|-------|
| DUSP6  | dual specificity phosphatase 6                                                                        | MKP-3, PYST1                                  | 12q22-q23       | 1848  |
| EHD3   | EH-domain containing 3                                                                                | n/a                                           | 2p21            | 30845 |
| ESR1   | estrogen receptor 1                                                                                   | NR3A1, Era                                    | 6q24-q27        | 2099  |
| ESR2   | estrogen receptor 2 (ER beta)                                                                         | NR3A2, Erb                                    | 14q21-q22       | 2100  |
| FBXO8  | F-box protein 8                                                                                       | FBX8, FBS                                     | 4q34.1          | 26269 |
| FGFR1  | fibroblast growth factor receptor 1                                                                   | H2, H3, H4, H5, CEK, FLG, BFGFR, N-SAM, CD331 | 8p12            | 2260  |
| FGFR2  | fibroblast growth factor receptor 2                                                                   | CEK3, TK14, TK25, ECT1, K-SAM, CD332          | 10q25.3-q26     | 2263  |
| FGFR3  | fibroblast growth factor receptor 3                                                                   | CEK2, JTK4, CD333                             | 4p16.3          | 2261  |
| FGFR4  | fibroblast growth factor receptor 4                                                                   | JTK2, CD334                                   | 5q33-qter       | 2264  |
| FKBP5  | FK506 binding protein 5                                                                               | FKBP51, FKBP54, PPlase, P54, Ptg-10           | 6p21.31         | 2289  |
| FZD3   | frizzled family receptor 3                                                                            | n/a                                           | 8p21            | 7976  |
| GABBR1 | gamma-aminobutyric acid (GABA) B receptor, 1                                                          | hGB1a, GPRC3A                                 | 6p21.3          | 2550  |
| GABRA3 | gamma-aminobutyric acid (GABA) A receptor, alpha 3                                                    | n/a                                           | Xq28            | 2556  |
| GABRA5 | gamma-aminobutyric acid (GABA) A receptor, alpha 5                                                    | n/a                                           | 15q11-q13       | 2558  |
| GABRA6 | gamma-aminobutyric acid (GABA) A receptor, alpha 6                                                    | n/a                                           | 5q34            | 2559  |
| GAD1   | glutamate decarboxylase 1 (brain, 67kDa)                                                              | n/a                                           | 2q31            | 2571  |
| GMIP   | GEM interacting protein                                                                               | ARHGAP46                                      | 19p13.11        | 51291 |
| GNAL   | guanine nucleotide binding protein (G protein), alpha activating activity polypeptide, olfactory type | n/a                                           | 18p11.22-p11.21 | 2774  |
| GNAS   | GNAS complex locus                                                                                    | NESP55, NESP, GNASXL, GPSA, SCG6              | 20q13.2-q13.3   | 2778  |
| GNB3   | guanine nucleotide binding protein (G protein), beta polypeptide 3                                    | n/a                                           | 12p13           | 2784  |
| GPR50  | G protein-coupled receptor 50                                                                         | H9, Mel1c                                     | Xq28            | 9248  |
| GRIA1  | glutamate receptor, ionotropic, AMPA 1                                                                | GLURA                                         | 5q33            | 2890  |
| GRIA2  | glutamate receptor, ionotropic, AMPA 2                                                                | GLURB                                         | 4q32-q33        | 2891  |
| GRIA3  | glutamate receptor, ionotropic, AMPA 3                                                                | GLURC, MRX94                                  | Xq25            | 2892  |
| GRIA4  | glutamate receptor, ionotropic, AMPA 4                                                                | GLURD                                         | 11q22           | 2893  |
| GRIK1  | glutamate receptor, ionotropic, kainate 1                                                             | n/a                                           | 21q22           | 2897  |
| GRIK2  | glutamate receptor, ionotropic, kainate 2                                                             | MRT6                                          | 6q16.3-q21      | 2898  |
| GRIK3  | glutamate receptor, ionotropic, kainate 3                                                             | GLUR7                                         | 1p34-p33        | 2899  |
| GRIK4  | glutamate receptor, ionotropic, kainate 4                                                             | KA1                                           | 11q             | 2900  |
| GRIK5  | glutamate receptor, ionotropic, kainate 5                                                             | KA2                                           | 19q13.2         | 2901  |
| GRIN1  | glutamate receptor, ionotropic, N-methyl D-                                                           | n/a                                           | 9q34.3          | 2902  |

|        |                                                                        |                              |               |        |
|--------|------------------------------------------------------------------------|------------------------------|---------------|--------|
|        | aspartate 1                                                            |                              |               |        |
| GRIN2A | glutamate receptor, ionotropic, N-methyl D-aspartate 2A                | n/a                          | 16p13.2       | 2903   |
| GRIN2B | glutamate receptor, ionotropic, N-methyl D-aspartate 2B                | n/a                          | 12p12         | 2904   |
| GRIN2C | glutamate receptor, ionotropic, N-methyl D-aspartate 2C                | n/a                          | 17q24-q25     | 2905   |
| GRIN2D | glutamate receptor, ionotropic, N-methyl D-aspartate 2D                | EB11, NR2D                   | 19q13.1-qter  | 2906   |
| GRIN3A | glutamate receptor, ionotropic, N-methyl-D-aspartate 3A                | n/a                          | 9q            | 116443 |
| GRM7   | glutamate receptor, metabotropic 7                                     | GPRC1G, MGLUR7               | 3p26.1        | 2917   |
| GSK3A  | glycogen synthase kinase 3 alpha                                       | n/a                          | 19q13         | 2931   |
| GSK3B  | glycogen synthase kinase 3 beta                                        | n/a                          | 3q13.3        | 2932   |
| GYPA   | glycophorin A (MNS blood group)                                        | GPA, MN, CD235a              | 4q31.21       | 2993   |
| HP     | haptoglobin                                                            | n/a                          | 16q22.2       | 3240   |
| HS6ST3 | heparan sulfate 6-O-sulfotransferase 3                                 | n/a                          | 13q32.2       | 266722 |
| HTR1A  | 5-hydroxytryptamine (serotonin) receptor 1A                            | 5-HT1A                       | 5q11.2-q13    | 3350   |
| HTR1B  | 5-hydroxytryptamine (serotonin) receptor 1B                            | S12, 5-HT1B, HTR1D2, 5-HT1DB | 6q13          | 3351   |
| HTR2A  | 5-hydroxytryptamine (serotonin) receptor 2A                            | 5-HT2A                       | 13q14-q21     | 3356   |
| HTR2B  | 5-hydroxytryptamine (serotonin) receptor 2B                            | 5-HT(2B), 5-HT2B             | 2q36.3-q37.1  | 3357   |
| HTR2C  | 5-hydroxytryptamine (serotonin) receptor 2C                            | 5-HT2C                       | Xq23          | 3358   |
| HTR3A  | 5-hydroxytryptamine (serotonin) receptor 3A                            | 5-HT3R, 5-HT3A               | 11q23.1-q23.2 | 3359   |
| HTR3B  | 5-hydroxytryptamine (serotonin) receptor 3B                            | 5-HT3B                       | 11q23.1       | 9177   |
| HTR4   | 5-hydroxytryptamine (serotonin) receptor 4                             | 5-HT4                        | 5q31-q33      | 3360   |
| HTR5A  | 5-hydroxytryptamine (serotonin) receptor 5A                            | 5-HT5A                       | 7q36.1        | 3361   |
| HTR6   | 5-hydroxytryptamine (serotonin) receptor 6                             | 5-HT6, 5-HT6R                | 1p36-p35      | 3362   |
| HTR7   | 5-hydroxytryptamine (serotonin) receptor 7 (adenylate cyclase-coupled) | 5-HT7                        | 10q21-q24     | 3363   |
| IL1B   | interleukin 1, beta                                                    | IL1F2, IL-1B, IL1-BETA       | 2q14          | 3553   |
| IL6    | interleukin 6 (interferon, beta 2)                                     | IL-6, BSF2, HGF, HSF         | 7p21-p15      | 3569   |
| ITPR1  | inositol 1,4,5-trisphosphate receptor, type 1                          | Insp3r1, IP3R1               | 3p26.1        | 3708   |
| KCNC2  | potassium voltage-gated channel, Shaw-related subfamily, member 2      | Kv3.2                        | 12q14.1       | 3747   |
| KLHL29 | kelch-like 29 (Drosophila)                                             | KIAA1921                     | 2p23.3        | 114818 |
| LBP    | lipopolysaccharide binding protein                                     | BPIFD2                       | 20q11.23      | 3929   |
| LEP    | leptin                                                                 | n/a                          | 7q31          | 3952   |
| LEPR   | leptin receptor                                                        | OBR, CD295                   | 1p31          | 3953   |
| LRP1   | low density lipoprotein receptor-related protein 1                     | LRP, CD91                    | 12q13-q14     | 4035   |
| M6PR   | mannose-6-phosphate receptor (cation                                   | n/a                          | 12            | 4074   |



|        |                                                                                        |                                                |               |        |
|--------|----------------------------------------------------------------------------------------|------------------------------------------------|---------------|--------|
|        | dependent)                                                                             |                                                |               |        |
| MAOA   | monoamine oxidase A                                                                    | n/a                                            | Xp11.4-p11.3  | 4128   |
| MAOB   | monoamine oxidase B                                                                    | n/a                                            | Xp11.4-p11.3  | 4129   |
| MMP2   | matrix metalloproteinase 2 (gelatinase A, 72kDa gelatinase, 72kDa type IV collagenase) | TBE-1                                          | 16q13-q21     | 4313   |
| MTHFR  | methylenetetrahydrofolate reductase (NAD(P)H)                                          | n/a                                            | 1p36.3        | 4524   |
| MYO5B  | myosin VB                                                                              | KIAA1119                                       | 18q           | 4645   |
| NFE2L3 | nuclear factor (erythroid-derived 2)-like 3                                            | Nrf3                                           | 7p15.2        | 9603   |
| NFKB1  | nuclear factor of kappa light polypeptide gene enhancer in B-cells 1                   | KBF1, p105, NFKB-p50, p50, NF-kappaB, NFkappaB | 4q24          | 4790   |
| NGFR   | nerve growth factor receptor                                                           | TNFRSF16, CD271, p75NTR                        | 17q21-q22     | 4804   |
| NOS1   | nitric oxide synthase 1 (neuronal)                                                     | nNOS                                           | 12q14-qter    | 4842   |
| NOS3   | nitric oxide synthase 3 (endothelial cell)                                             | ECNOS, eNOS                                    | 7q36          | 4846   |
| NPY    | neuropeptide Y                                                                         | PYY4                                           | 7p15.3        | 4852   |
| NR3C1  | nuclear receptor subfamily 3, group C, member 1 (glucocorticoid receptor)              | GR                                             | 5q31-q32      | 2908   |
| NTRK2  | neurotrophic tyrosine kinase, receptor, type 2                                         | TRKB                                           | 9q22.1        | 4915   |
| NTRK3  | neurotrophic tyrosine kinase, receptor, type 3                                         | TRKC                                           | 15q24-q25     | 4916   |
| OASL   | 2'-5'-oligoadenylate synthetase-like                                                   | TRIP14, p59OASL                                | 12q24.2       | 8638   |
| OLIG1  | oligodendrocyte transcription factor 1                                                 | BHLHB6, bHLHe21                                | 21q22.11      | 116448 |
| OLIG2  | oligodendrocyte lineage transcription factor 2                                         | RACK17, OLIGO2, bHLHe19                        | 21q22.11      | 10215  |
| OLIG3  | oligodendrocyte transcription factor 3                                                 | Bhlhb7, bHLHe20                                | 6q23.3        | 167826 |
| OPRD1  | opioid receptor, delta 1                                                               | n/a                                            | 1p36.1-p34.3  | 4985   |
| OPRK1  | opioid receptor, kappa 1                                                               | KOR                                            | 8q11.2        | 4986   |
| OPRM1  | opioid receptor, mu 1                                                                  | MOR1                                           | 6q24-q25      | 4988   |
| P2RX4  | purinergic receptor P2X, ligand-gated ion channel, 4                                   | P2X4                                           | 12q24.32      | 5025   |
| P2RX7  | purinergic receptor P2X, ligand-gated ion channel, 7                                   | P2X7, MGC20089                                 | 12q24         | 5027   |
| PAM    | peptidylglycine alpha-amidating monooxygenase                                          | PAL, PHM                                       | 5q            | 5066   |
| PCLO   | piccolo (presynaptic cytomatrix protein)                                               | KIAA0559, DKFZp779G1236, ACZ                   | 7q11.23-q21.3 | 27445  |
| PDE10A | phosphodiesterase 10A                                                                  | n/a                                            | 6q26          | 10846  |
| PDE11A | phosphodiesterase 11A                                                                  | n/a                                            | 2q31.3        | 50940  |
| PDE1A  | phosphodiesterase 1A, calmodulin-dependent                                             | n/a                                            | 2q32.1        | 5136   |
| PDE2A  | phosphodiesterase 2A, cGMP-stimulated                                                  | n/a                                            | 11q13.1-q14.1 | 5138   |
| PDE5A  | phosphodiesterase 5A, cGMP-specific                                                    | n/a                                            | 4q27          | 8654   |
| PDE6C  | phosphodiesterase 6C, cGMP-specific, cone, alpha prime                                 | PDEA2                                          | 10q24         | 5146   |

|          |                                                                                     |                                      |                 |        |
|----------|-------------------------------------------------------------------------------------|--------------------------------------|-----------------|--------|
| PDE9A    | phosphodiesterase 9A                                                                | n/a                                  | 21q22.3         | 5152   |
| PENK     | proenkephalin                                                                       | n/a                                  | 8q23-q24        | 5179   |
| PER1     | period homolog 1 (Drosophila)                                                       | RIGUI                                | 17p13.1         | 5187   |
| PER2     | period homolog 2 (Drosophila)                                                       | KIAA0347                             | 2q37.3          | 8864   |
| PER3     | period homolog 3 (Drosophila)                                                       | n/a                                  | 1p36.23         | 8863   |
| PHACTR3  | phosphatase and actin regulator 3                                                   | n/a                                  | 20q13.32-q13.33 | 116154 |
| PLA2G2A  | phospholipase A2, group IIA (platelets, synovial fluid)                             | n/a                                  | 1p35            | 5320   |
| PLA2G4A  | phospholipase A2, group IVA (cytosolic, calcium-dependent)                          | cPLA2-alpha                          | 1q25            | 5321   |
| POMC     | proopiomelanocortin                                                                 | MSH, POC, CLIP, ACTH, NPP, LPH       | 2p23            | 5443   |
| PRKCH    | protein kinase C, eta                                                               | PKC-L, PKCL                          | 14q23.1         | 5583   |
| PSMB4    | proteasome (prosome, macropain) subunit, beta type, 4                               | HN3, PROS26                          | 1q21            | 5692   |
| PSMD9    | proteasome (prosome, macropain) 26S subunit, non-ATPase, 9                          | p27, Rpn4                            | 12q24.31-q24.32 | 5715   |
| PTPRR    | protein tyrosine phosphatase, receptor type, R                                      | PTPBR7, PTP-SL, EC-PTP, PCPTP1       | 12q15           | 5801   |
| ROS1     | c-ros oncogene 1 , receptor tyrosine kinase                                         | MCF3, ROS, c-ros-1                   | 6q21-q22        | 6098   |
| SERPINA3 | serpin peptidase inhibitor, clade A (alpha-1 antiproteinase, antitrypsin), member 3 | ACT, alpha-1-antichymotrypsin        | 14q32.1         | 12     |
| SLC25A21 | solute carrier family 25 (mitochondrial oxodicarboxylate carrier), member 21        | ODC1, ODC                            | 14q13.3         | 89874  |
| SLC6A1   | solute carrier family 6 (neurotransmitter transporter, GABA), member 1              | GAT1, GABATR, GABATHG                | 3p25-p24        | 6529   |
| SLC6A2   | solute carrier family 6 (neurotransmitter transporter, noradrenalin), member 2      | NET                                  | 16q12.2         | 6530   |
| SLC6A3   | solute carrier family 6 (neurotransmitter transporter, dopamine), member 3          | DAT                                  | 5p15.3          | 6531   |
| SLC6A4   | solute carrier family 6 (neurotransmitter transporter, serotonin), member 4         | 5-HTT, SERT1                         | 17q11.2         | 6532   |
| SMG7     | smg-7 homolog, nonsense mediated mRNA decay factor (C. elegans)                     | KIAA0250, EST1C, SGA56M, SMG-7       | 1q25            | 9887   |
| SPAG16   | sperm associated antigen 16                                                         | PF20, FLJ22724, DKFZp666P1710, WDR29 | 2q34            | 79582  |
| STAT3    | signal transducer and activator of transcription 3 (acute-phase response factor)    | APRF                                 | 17q21           | 6774   |
| SYN3     | synapsin III                                                                        | n/a                                  | 22q12.3         | 8224   |
| TAC1     | tachykinin, precursor 1                                                             | NPK                                  | 7q21-q22        | 6863   |
| TACR1    | tachykinin receptor 1                                                               | SPR, NK1R, NKIR                      | 2p13.1-p12      | 6869   |
| TBX21    | T-box 21                                                                            | TBLYM, T-bet                         | 17q21.2         | 30009  |
| TCF20    | transcription factor 20 (AR1)                                                       | AR1, SPBP                            | 22q13.3         | 6942   |

|         |                                                                     |                          |               |        |
|---------|---------------------------------------------------------------------|--------------------------|---------------|--------|
| TDRD3   | tudor domain containing 3                                           | FLJ21007                 | 13q14.3       | 81550  |
| TFCP2   | transcription factor CP2                                            | CP2, LSF, LBP-1C, TFCP2C | 12q13         | 7024   |
| TH      | tyrosine hydroxylase                                                | DYT5b                    | 11p15.5       | 7054   |
| TNF     | tumor necrosis factor                                               | TNFSF2, DIF, TNF-alpha   | 6p21.3        | 7124   |
| TPH1    | tryptophan hydroxylase 1                                            | n/a                      | 11p15.3-p14   | 7166   |
| TPH2    | tryptophan hydroxylase 2                                            | NTPH, FLJ37295           | 12q15         | 121278 |
| TSPAN8  | tetraspanin 8                                                       | CO-029                   | 12q14.1-q21.1 | 7103   |
| UGT2A1  | UDP glucuronosyltransferase 2 family, polypeptide A1, complex locus | n/a                      | 4q13          | 10941  |
| VGLL4   | vestigial like 4 (Drosophila)                                       | KIAA0121                 | 3p25.2        | 9686   |
| WFS1    | Wolfram syndrome 1 (wolframin)                                      | DIDMOAD, WFS             | 4p16.1        | 7466   |
| ZNF804A | zinc finger protein 804A                                            | n/a                      | 2q32.1        | 91752  |

**Table S3.2.** Functional relationship analysis results from GRAIL for MDD candidate genes

| Gene  | GRAIL P   | Selected Similar Genes (Rank in Parentheses)                                                                                                                                                                                                                                                                                                                                                                                                                                                                                                                                                                                                                                                                                                                                                                                                                                                                                                                                                                                                                                                                                                                                                                                                                                                                                                                                                                                                                                                                  |
|-------|-----------|---------------------------------------------------------------------------------------------------------------------------------------------------------------------------------------------------------------------------------------------------------------------------------------------------------------------------------------------------------------------------------------------------------------------------------------------------------------------------------------------------------------------------------------------------------------------------------------------------------------------------------------------------------------------------------------------------------------------------------------------------------------------------------------------------------------------------------------------------------------------------------------------------------------------------------------------------------------------------------------------------------------------------------------------------------------------------------------------------------------------------------------------------------------------------------------------------------------------------------------------------------------------------------------------------------------------------------------------------------------------------------------------------------------------------------------------------------------------------------------------------------------|
| HTR2A | 5.76E-111 | HTR2B(1), HTR6(2), HTR2C(3), HTR1A(4), SLC6A4(5), HTR5A(6), HTR1B(7), HTR7(10), HTR3A(11), HTR3B(13), TPH2(14), HTR4(15), ADRA2A(17), ADRA2B(18), ADORA2A(19), TPH1(20), ADRA2C(21), MAOA(23), DRD2(26), DRD1(27), DRD3(30), DRD4(31), ADRB1(33), GRIK3(35), GNB3(36), TACR1(38), ADRA1A(40), AGTR1(41), DTNBP1(47), IL6(48), DAOA(57), ADRA1B(58), GABBR1(59), IL1B(63), TNF(65), DRD5(72), GRIA3(73), GRIA4(74), ESR1(81), ITPR1(89), SLC6A2(92), GRIN1(93), CHRM2(96), SLC6A3(110), TAC1(115), GABRA3(117), CCKBR(118), GPR50(120), NR3C1(122), GRIN2A(134), GRIN2D(138), GRIA1(146), GRM7(150), GRIN2B(153), CCKAR(158), COMT(161), GRIN2C(166), GNAS(168), CTLA4(172), CRHR1(174), GABRA6(176), APOE(177), AVPR1A(179), ACE(181), TH(204), CNR1(208), ESR2(212), CRHR2(216), ABCB1(219), OPRM1(224), BDNF(228), MTHFR(232), LEPR(234), OPRD1(255), AVPR1B(258), OPRK1(267), GNAL(276), NOS3(281), P2RX7(299), FZD3(301), GRIK4(303), FGFR2(310), AR(316), GABRA5(318), POMC(354), SERPINA3(355), GAD1(359), CYP2C9(369), CACNA1C(382), GRIA2(386), DDC(414), NPY(416), CHRNA7(421), GRIK1(433), LEP(454), PENK(459), CCL2(497), GRIK2(539), ADCY9(556), GRIN3A(611), FGFR1(737), CHRFAM7A(748), FGFR3(751), AKT1(765), LRP1(790), CREB1(796), NOS1(800), FGFR4(808), NGFR(833), MMP2(936), CCK(960), GRIK5(1104), P2RX4(1129), NFKB1(1168), PLA2G2A(1200), MAOB(1289), NTRK2(1345), DISC1(1347), PDE1A(1359), GSK3B(1361), SYN3(1439), WFS1(1542), ROS1(1585), SLC6A1(1586), GMIP(1727), PRKCH(1801)     |
| DRD3  | 4.52E-109 | DRD2(1), DRD1(2), DRD5(3), DRD4(4), SLC6A3(5), TH(10), CCND2(14), HTR1B(15), HTR1A(16), ADORA2A(17), HTR2A(19), ADRA2B(20), ADRA2A(28), HTR2C(31), ADRA2C(36), CCKBR(38), AGTR1(40), OPRM1(48), GRIN1(49), ADRB1(50), SLC6A2(51), GRIA4(53), TACR1(54), GRIK3(55), HTR6(58), HTR3A(59), ADRA1B(60), HTR5A(63), SLC6A4(65), CNR1(66), GRIA1(68), GRIA3(71), GABBR1(74), PENK(79), DTNBP1(84), BDNF(85), OPRK1(86), GABRA3(89), ADRA1A(90), OPRD1(93), IL6(94), CCKAR(101), HTR7(105), CHRM2(111), ESR1(113), GRIN2C(122), GRIN2D(123), HTR2B(126), CRHR1(128), GRIN2A(133), TNF(134), TAC1(138), GABRA6(147), NR3C1(152), GRM7(155), ITPR1(158), MAOA(160), LEPR(163), CRHR2(167), HTR4(169), COMT(172), GRIN2B(177), DAOA(187), DDC(191), AVPR1A(193), GNAL(199), IL1B(217), GNAS(218), AVPR1B(222), GAD1(226), ESR2(228), APOE(239), FGFR2(244), POMC(274), CREB1(279), ABCB1(298), NPY(300), GRIK4(308), GABRA5(314), ADCY9(318), TPH2(319), NOS3(333), LEP(340), P2RX7(347), GRIA2(349), CHRNA7(354), NOS1(366), AR(371), ACE(380), GNB3(397), FZD3(404), NTRK2(423), FGFR1(481), FGFR3(517), GRIN3A(547), NGFR(550), GRIK1(560), MAOB(566), GRIK2(610), CTLA4(615), CCK(639), AKT1(640), GPR50(666), LRP1(683), CACNA1C(707), FGFR4(766), GRIK5(833), SYN3(863), CHRFAM7A(875), GSK3B(904), TPH1(938), CYP2C9(945), NTRK3(961), ROS1(1010), P2RX4(1019), SERPINA3(1023), MMP2(1119), CRHBP(1129), NFKB1(1148), CCL2(1202), HTR3B(1224), PDE10A(1304), DISC1(1309), PSMD9(1453), MTHFR(1784), SLC6A1(1832) |
| DRD4  | 2.21E-104 | DRD2(1), DRD3(2), SLC6A3(3), DRD1(4), DRD5(5), SLC6A4(12), HTR2A(13), COMT(14), DAOA(15), DTNBP1(16), TH(17), MAOA(19), ADRA2B(25), HTR1B(27), HTR6(28), GRIK3(29), ADRA2A(30), TPH2(31), HTR1A(33), SLC6A2(35), GNB3(36), ADRA2C(37), HTR2C(39), ADRB1(59), AGTR1(60), IL6(63), GRIA4(65), GABBR1(68), ADORA2A(72),                                                                                                                                                                                                                                                                                                                                                                                                                                                                                                                                                                                                                                                                                                                                                                                                                                                                                                                                                                                                                                                                                                                                                                                          |

|       |           |                                                                                                                                                                                                                                                                                                                                                                                                                                                                                                                                                                                                                                                                                                                                                                                                                                                                                                                                                                                                                                                                                                                                                                                                                                                                                                                                                                                                                                                                                                                               |
|-------|-----------|-------------------------------------------------------------------------------------------------------------------------------------------------------------------------------------------------------------------------------------------------------------------------------------------------------------------------------------------------------------------------------------------------------------------------------------------------------------------------------------------------------------------------------------------------------------------------------------------------------------------------------------------------------------------------------------------------------------------------------------------------------------------------------------------------------------------------------------------------------------------------------------------------------------------------------------------------------------------------------------------------------------------------------------------------------------------------------------------------------------------------------------------------------------------------------------------------------------------------------------------------------------------------------------------------------------------------------------------------------------------------------------------------------------------------------------------------------------------------------------------------------------------------------|
|       |           | GABRA3(74), ESR1(75), GRIN1(78), GPR50(81), TNF(83), CTLA4(85), GRIA3(86), TPH1(87), GRIA1(90), ACE(94), IL1B(100), GNAS(103), CCKBR(106), APOE(110), HTR3A(113), HTR5A(124), MTHFR(133), ABCB1(144), CCKAR(145), DDC(154), CYP2C9(159), AR(164), ADRA1B(168), GRIN2A(176), SYN3(177), ADRA1A(182), GABRA6(183), NR3C1(190), TACR1(193), GRIN2B(194), GRM7(211), CCND2(220), ADCY9(222), GAD1(224), HTR4(227), CNR1(233), CHRM2(235), NOS3(243), GNAL(249), OPRM1(250), BDNF(251), FZD3(261), PENK(263), HTR7(266), GABRA5(270), MAOB(272), GRIK4(274), GRIN2C(276), GRIN2D(286), HTR2B(287), ESR2(299), CRHR1(303), CHRFAM7A(306), DISC1(312), TAC1(338), ITPR1(339), LEPR(344), AVPR1A(352), FGFR2(358), OPRK1(404), POMC(415), AVPR1B(419), CRHR2(421), SERPINA3(493), WFS1(495), OPRD1(507), CHRNA7(508), GRIK2(522), P2RX7(525), GRIA2(557), NPY(566), CREB1(569), GRIK1(641), LEP(673), FGFR3(684), CCL2(713), CACNA1C(856), FGFR4(966), CRHBP(989), LRP1(1002), NOS1(1101), ROS1(1115), FGFR1(1198), AKT1(1210), GYPA(1212), CCK(1242), GRIN3A(1271), MMP2(1581), NFKB1(1621), GSK3B(1717), SLC6A1(1783), GRIK5(1792), NGFR(1896)                                                                                                                                                                                                                                                                                                                                                                                      |
| DRD2  | 1.59E-102 | DRD1(1), DRD3(2), DRD5(3), SLC6A3(4), DRD4(5), CCND2(6), TH(12), ADORA2A(13), HTR1B(20), HTR2A(24), ADRA2B(25), HTR1A(26), ADRA2A(29), ADRA2C(35), CCKBR(40), HTR2C(41), GRIA1(42), GABBR1(43), ADRB1(45), GRIN1(47), OPRM1(48), GRIA4(54), ADRA1B(60), GRIK3(61), TACR1(62), AGTR1(63), HTR3A(64), SLC6A2(66), CNR1(71), OPRD1(72), OPRK1(74), ADRA1A(75), GRIA3(80), CHRM2(82), GABRA3(84), HTR6(85), PENK(89), ESR1(93), IL6(95), SLC6A4(102), HTR5A(106), GRIN2C(107), GRIN2A(122), TNF(125), GRM7(126), GRIN2D(128), CCKAR(131), HTR2B(132), CRHR1(134), GABRA6(135), GRIN2B(151), POMC(153), TAC1(154), HTR7(155), GNAL(156), AVPR1B(158), CRHR2(170), MAOA(171), GAD1(172), GNAS(176), NR3C1(177), ITPR1(183), IL1B(190), LEPR(192), HTR4(194), COMT(203), ESR2(206), ADCY9(208), DTNBP1(229), CREB1(233), AVPR1A(238), GRIA2(244), BDNF(247), GABRA5(254), APOE(256), DDC(272), FGFR2(276), ABCB1(296), NPY(307), GRIK4(337), P2RX7(352), AR(362), LEP(369), CHRNA7(374), MAOB(405), GRIK1(413), AKT1(446), GRIK2(460), NOS3(476), CACNA1C(490), GNB3(502), DAOA(504), GRIN3A(507), FGFR1(516), NOS1(521), NGFR(532), GPR50(554), ACE(635), GRIK5(664), CCK(677), FGFR3(686), TPH2(706), LRP1(736), CTLA4(748), PDE10A(752), NFKB1(775), NTRK2(813), FGFR4(862), FZD3(917), GSK3B(935), SLC6A1(957), MMP2(963), P2RX4(981), CYP2C9(1005), ROS1(1029), SERPINA3(1083), HTR3B(1125), CCL2(1238), CHRFAM7A(1252), CRHBP(1254), SYN3(1273), NTRK3(1277), TPH1(1584), STAT3(1734), PSMD9(1832), PRKCH(1928), PLA2G2A(1936) |
| HTR1B | 1.49E-101 | HTR1A(1), HTR2B(3), HTR2A(4), HTR5A(6), HTR2C(7), HTR6(8), HTR7(9), HTR3A(10), SLC6A4(11), HTR3B(12), HTR4(13), TPH2(15), ADRA1B(16), DRD1(18), ADRA2C(19), DRD2(20), DRD3(21), MAOA(22), ADRA2A(24), ADRA2B(26), ADRA1A(27), TPH1(29), TACR1(30), ADORA2A(32), DRD5(33), GRM7(34), CHRM2(39), GRIA1(41), CNR1(45), AGTR1(46), GABBR1(47), ADRB1(50), SLC6A3(52), GRIA3(54), AVPR1B(56), GRIN1(57), CCKBR(59), GRIK3(63), SLC6A2(65), CRHR2(68), CRHR1(73), IL6(79), GRIA4(80), TAC1(83), GABRA5(85), TH(87), GABRA6(92), OPRM1(94), ITPR1(96), ESR1(103), DRD4(106), NR3C1(107), GABRA3(110), GRIN2A(113), AVPR1A(115), PENK(123), GRIN2D(130), IL1B(133), TNF(141), GRIN2C(151), OPRK1(154), BDNF(162), LEPR(164), OPRD1(166), GRIN2B(176), CCKAR(177), APOE(180), ESR2(181), GRIA2(183), POMC(205), GNAS(219), GRIK1(226), NPY(235), CHRNA7(247), GRIK4(259), ABCB1(261), LEP(262), CREB1(270), NOS1(281), NOS3(288), GAD1(298), P2RX7(305),                                                                                                                                                                                                                                                                                                                                                                                                                                                                                                                                                                               |

|       |          |                                                                                                                                                                                                                                                                                                                                                                                                                                                                                                                                                                                                                                                                                                                                                                                                                                                                                                                                                                                                                                                                                                                                                                                                                                                                                                                                                                                                                                  |
|-------|----------|----------------------------------------------------------------------------------------------------------------------------------------------------------------------------------------------------------------------------------------------------------------------------------------------------------------------------------------------------------------------------------------------------------------------------------------------------------------------------------------------------------------------------------------------------------------------------------------------------------------------------------------------------------------------------------------------------------------------------------------------------------------------------------------------------------------------------------------------------------------------------------------------------------------------------------------------------------------------------------------------------------------------------------------------------------------------------------------------------------------------------------------------------------------------------------------------------------------------------------------------------------------------------------------------------------------------------------------------------------------------------------------------------------------------------------|
|       |          | GRIK2(321), DDC(349), CACNA1C(371), NGFR(432), FGFR2(448), GRIK5(458), NTRK2(468), AR(483), ADCY9(500), SLC6A1(538), GRIN3A(580), KCNC2(592), DTNBP1(607), GNAL(667), CCK(682), GPR50(743), P2RX4(769), ROS1(908), GNB3(929), FGFR1(933), MAOB(934), AKT1(953), NFKB1(967), CTLA4(1002), FGFR3(1045), NTRK3(1059), MMP2(1102), LRP1(1144), CYP2C9(1195), FZD3(1198), PER1(1255), FGFR4(1257), GSK3B(1271), ACE(1291), PER2(1324), CLOCK(1357), SERPINA3(1373), PER3(1380), PDE1A(1415), DAOA(1465), COMT(1480), CHRFBAM7A(1514), CRHBP(1600), PDE10A(1830), CCND2(1900), CCL2(1922)                                                                                                                                                                                                                                                                                                                                                                                                                                                                                                                                                                                                                                                                                                                                                                                                                                              |
| HTR1A | 3.26E-95 | HTR1B(1), HTR2A(2), HTR2B(3), HTR5A(4), HTR7(7), HTR6(8), HTR2C(9), HTR3A(10), SLC6A4(11), HTR3B(14), HTR4(15), TPH2(16), ADRA1A(17), DRD1(19), ADRA2B(20), ADRA1B(21), ADRA2C(23), ADRA2A(24), DRD3(25), TPH1(28), DRD2(29), AGTR1(34), GABBR1(37), ADRB1(38), MAOA(39), TACR1(44), AVPR1A(45), ADORA2A(49), GRM7(53), DRD5(56), GRIA3(57), CCKBR(66), CRHR1(67), CHRM2(68), GRIA1(73), CRHR2(75), GRIN1(77), GRIA4(79), ITPR1(84), GABRA3(86), CNR1(90), GNAS(95), ESR1(96), GABRA5(102), SLC6A2(104), GRIK3(106), GABRA6(111), NR3C1(113), AVPR1B(120), IL6(121), TH(124), TAC1(125), GRIN2D(140), TNF(146), OPRM1(162), ESR2(164), GRIN2A(169), GRIN2C(170), OPRD1(182), GRIN2B(184), IL1B(185), GRIA2(186), OPRK1(187), LEPR(188), PENK(189), CCKAR(191), ADCY9(215), BDNF(216), SLC6A3(218), DRD4(222), POMC(227), CREB1(248), GRIK4(271), NPY(294), LEP(308), CACNA1C(309), GAD1(313), GRIN3A(321), CHRNA7(336), GNAL(337), FGFR2(362), APOE(364), P2RX7(372), GRIK1(380), DDC(383), ABCB1(398), PDE1A(405), SLC6A1(422), AR(436), NOS1(482), GPR50(486), GNB3(509), GRIK2(554), AKT1(566), NGFR(572), NOS3(584), NTRK2(702), GRIK5(711), CCK(730), P2RX4(751), FGFR1(768), NFKB1(769), LRP1(774), ROS1(961), GSK3B(966), DTNBP1(991), FGFR3(1015), CTLA4(1030), CRHBP(1082), MMP2(1155), FGFR4(1204), FZD3(1260), MAOB(1311), SERPINA3(1351), CCL2(1386), ACE(1485), NTRK3(1548), CYP2C9(1553), STAT3(1977), KCNC2(1985) |
| HTR2C | 2.80E-86 | HTR2A(1), HTR2B(2), HTR6(3), HTR1A(4), HTR5A(6), HTR1B(7), HTR3A(10), SLC6A4(11), HTR7(12), HTR3B(13), HTR4(14), ADRA2C(16), TPH2(17), ADRA2B(18), DRD1(21), TPH1(22), ADRA2A(24), DRD2(27), DRD3(31), ADRB1(37), ADORA2A(43), ADRA1B(44), ADRA1A(46), MAOA(47), TACR1(52), ITPR1(53), LEPR(55), DRD5(60), GRIA3(62), GRIA4(69), AGTR1(74), CCKBR(75), GRIK3(77), LEP(87), GABBR1(97), CHRM2(106), ESR1(108), IL6(118), CRHR1(119), GRIN1(121), GRIN2C(122), GRIA1(123), NR3C1(124), CRHR2(141), TH(145), CNR1(146), GPR50(153), SLC6A2(157), GRM7(160), CCKAR(163), TNF(172), GABRA3(174), OPRD1(184), GRIN2D(185), POMC(196), FGFR2(205), TAC1(210), GNAS(212), GABRA6(221), AVPR1B(223), ESR2(227), OPRK1(233), NPY(238), GRIN2A(242), DRD4(245), OPRM1(247), GRIA2(260), AVPR1A(281), SLC6A3(287), IL1B(290), GRIN2B(310), GABRA5(320), AR(331), P2RX7(360), CACNA1C(412), PENK(436), GRIK1(442), DDC(455), ABCB1(463), APOE(465), BDNF(474), FGFR1(475), GNAL(497), GRIK2(514), GRIK4(540), CHRNA7(570), AKT1(594), GNB3(599), GAD1(698), ADCY9(703), FGFR3(704), CREB1(741), FGFR4(811), NGFR(815), DTNBP1(852), ROS1(915), GRIN3A(932), LRP1(943), NOS3(967), NTRK2(996), CTLA4(1038), NOS1(1067), P2RX4(1096), CCK(1134), GRIK5(1154), GSK3B(1212), CYP2C9(1232), NFKB1(1268), FZD3(1289), NTRK3(1640), SLC6A1(1742), MMP2(1785), PSMD9(1804), SERPINA3(1815), CCL2(1971)                                                |
| DRD1  | 7.21E-83 | DRD2(1), DRD5(2), DRD3(3), SLC6A3(4), DRD4(6), ADORA2A(12), TH(13), GRIN1(14),                                                                                                                                                                                                                                                                                                                                                                                                                                                                                                                                                                                                                                                                                                                                                                                                                                                                                                                                                                                                                                                                                                                                                                                                                                                                                                                                                   |

|       |          |                                                                                                                                                                                                                                                                                                                                                                                                                                                                                                                                                                                                                                                                                                                                                                                                                                                                                                                                                                                                                                                                                                                                                                                                                                                                                                                                                                                                                                               |
|-------|----------|-----------------------------------------------------------------------------------------------------------------------------------------------------------------------------------------------------------------------------------------------------------------------------------------------------------------------------------------------------------------------------------------------------------------------------------------------------------------------------------------------------------------------------------------------------------------------------------------------------------------------------------------------------------------------------------------------------------------------------------------------------------------------------------------------------------------------------------------------------------------------------------------------------------------------------------------------------------------------------------------------------------------------------------------------------------------------------------------------------------------------------------------------------------------------------------------------------------------------------------------------------------------------------------------------------------------------------------------------------------------------------------------------------------------------------------------------|
|       |          | <p>CCND2(15), HTR1A(16), HTR1B(18), GRIN2C(19), ADRA2B(22), GRIN2A(23), GRIA1(25), ADRA2A(27), GRIN2D(29), GRIA4(34), HTR2A(39), ADRB1(41), ADRA2C(42), ADRA1B(44), GRIN2B(45), HTR2C(46), AGTR1(55), ADRA1A(56), CCKBR(58), OPRM1(62), GRIA3(66), HTR3A(69), OPRK1(71), CNR1(74), GABBR1(75), OPRD1(77), TACR1(78), HTR5A(84), GNAL(89), HTR6(93), GRM7(96), CHRM2(99), GRIK3(103), ADCY9(104), HTR2B(112), PENK(118), HTR7(124), CREB1(128), SLC6A2(130), GRIN3A(137), GABRA3(139), ITPR1(141), GNAS(143), ESR1(147), GRIA2(148), CRHR1(150), HTR4(163), IL6(175), CCKAR(182), CRHR2(189), AVPR1A(195), TAC1(201), NR3C1(204), TNF(207), GABRA6(208), AVPR1B(235), SLC6A4(261), GABRA5(268), GRIK1(270), LEPR(278), ESR2(283), IL1B(300), FGFR2(305), GAD1(307), P2RX7(311), BDNF(320), AKT1(335), GRIK4(342), POMC(355), GRIK2(360), NPY(384), DDC(388), NOS1(389), CACNA1C(411), CHRNA7(442), FGFR1(456), GRIK5(491), AR(507), NGFR(530), APOE(547), NOS3(553), MAOA(566), GSK3B(571), NFKB1(586), PSMD9(589), PDE10A(593), NTRK2(605), LEP(606), LRP1(712), HTR3B(735), P2RX4(779), ABCB1(783), FGFR3(784), CCK(821), FGFR4(838), ROS1(968), COMT(997), GPR50(1103), STAT3(1108), NTRK3(1115), SLC6A1(1140), PDE1A(1185), MAOB(1195), MMP2(1246), DTNBP1(1374), ACE(1451), CTLA4(1473), FZD3(1484), GNB3(1527), PRKCH(1678), M6PR(1705), CCL2(1752), CRHBP(1792), TPH2(1865), SERPINA3(1947)</p>                                         |
| HTR7  | 5.20E-82 | <p>HTR2B(1), HTR1A(2), HTR5A(3), HTR6(4), HTR2A(6), HTR3A(7), HTR1B(8), HTR2C(10), HTR4(12), HTR3B(13), SLC6A4(14), TPH2(16), ADRA2B(17), ADRA1A(23), DRD1(25), ADRA2C(27), GRIA4(31), TPH1(32), ADORA2A(33), ADRA2A(36), TACR1(37), ADRA1B(38), DRD3(39), ADRB1(41), DRD2(44), DRD5(47), GRM7(50), ITPR1(54), GRIK3(57), GRIA3(60), CCKBR(62), MAOA(66), AGTR1(69), GABBR1(74), ADCY9(88), CHRM2(95), GRIN1(98), CRHR1(109), CRHR2(111), OPRK1(121), GRIA1(126), OPRD1(127), GRIN2D(130), CNR1(134), GRIN2C(148), IL6(151), AVPR1A(152), AVPR1B(154), NR3C1(155), GRIK4(159), GABRA6(172), ESR1(176), CACNA1C(181), TAC1(182), GNAS(183), P2RX7(197), GABRA3(201), OPRM1(203), GRIN2A(205), CCKAR(218), GRIN2B(222), GRIK1(234), GRIA2(241), GABRA5(249), ESR2(256), TNF(262), IL1B(279), CHRNA7(298), GRIN3A(323), FGFR2(324), TH(325), LEPR(330), GRIK5(360), PDE1A(373), GRIK2(379), SLC6A2(389), P2RX4(403), CREB1(421), PENK(450), POMC(485), GNAL(496), AR(539), GPR50(571), DRD4(581), ABCB1(617), FGFR1(628), LRP1(660), NOS1(705), PDE11A(707), PDE10A(710), DDC(778), NPY(783), LEP(789), NOS3(829), BDNF(832), GAD1(860), FGFR4(907), AKT1(937), SLC6A3(950), APOE(951), NGFR(954), FZD3(1044), FGFR3(1082), NFKB1(1135), CCK(1146), PDE9A(1149), SERPINA3(1233), PDE5A(1293), GNB3(1330), NTRK2(1336), CHRFA7A(1356), MMP2(1491), ROS1(1562), DTNBP1(1609), SLC6A1(1626), GSK3B(1660), CTLA4(1871), FKBP5(1919), PDE2A(1935)</p> |
| CCKAR | 9.28E-78 | <p>CCK(1), CCKBR(2), ADRA2B(8), ADRB1(10), DRD1(16), DRD2(18), DRD3(19), ADRA2C(20), ADRA1A(22), AR(23), HTR3A(24), ADRA2A(25), ADRA1B(27), HTR2A(28), HTR1A(39), AGTR1(40), TACR1(41), LEPR(45), HTR2C(49), IL6(50), LEP(55), CRHR1(59), ADORA2A(62), ITPR1(64), NPY(68), HTR1B(69), TNF(72), DRD5(78), ESR1(83), GABBR1(91), HTR6(99), CHRM2(101), IL1B(103), CRHR2(112), HTR5A(120), AVPR1A(123), HTR2B(134), TAC1(138), GRIA3(140), GRIK3(142), NR3C1(148), POMC(154), PENK(160), GNAS(164), TH(166), HTR4(167), HTR7(170), AVPR1B(171), GRIA4(176), GRM7(186), GRIN1(189), APOE(208), CNR1(211), OPRD1(243), OPRK1(246), FGFR2(266), ESR2(269), CACNA1C(275), GABRA6(276), OPRM1(296), DRD4(323), GABRA3(332), NOS3(342), GRIA1(350), NOS1(378), ABCB1(380),</p>                                                                                                                                                                                                                                                                                                                                                                                                                                                                                                                                                                                                                                                                         |

|        |          |                                                                                                                                                                                                                                                                                                                                                                                                                                                                                                                                                                                                                                                                                                                                                                                                                                                                                                                                                                                                                                                                                                                                                                                                                                                                                                               |
|--------|----------|---------------------------------------------------------------------------------------------------------------------------------------------------------------------------------------------------------------------------------------------------------------------------------------------------------------------------------------------------------------------------------------------------------------------------------------------------------------------------------------------------------------------------------------------------------------------------------------------------------------------------------------------------------------------------------------------------------------------------------------------------------------------------------------------------------------------------------------------------------------------------------------------------------------------------------------------------------------------------------------------------------------------------------------------------------------------------------------------------------------------------------------------------------------------------------------------------------------------------------------------------------------------------------------------------------------|
|        |          | SLC6A4(407), GNB3(450), P2RX7(457), GPR50(515), GRIN2C(517), GRIN2A(533), CTLA4(560), GRIN2D(562), GRIN2B(604), NFKB1(664), AKT1(667), FGFR4(735), SERPINA3(743), SLC6A2(755), FGFR1(786), ADCY9(793), SLC6A3(830), MMP2(838), GNAL(871), GRIA2(878), GAD1(899), CREB1(913), LRP1(946), CCL2(967), ACE(980), FGFR3(1071), P2RX4(1090), CHRNA7(1145), DTNBP1(1151), NGFR(1164), BDNF(1188), PLA2G2A(1216), GABRA5(1226), CYP2C9(1247), GRIK4(1418), FZD3(1419), PSMD9(1457), ROS1(1465), GRIK1(1508), GRIN3A(1536), GRIK2(1546), MAOA(1600), HTR3B(1784), NTRK2(1901)                                                                                                                                                                                                                                                                                                                                                                                                                                                                                                                                                                                                                                                                                                                                          |
| SLC6A4 | 6.29E-77 | HTR2A(1), HTR1A(2), HTR2B(3), HTR6(4), HTR2C(5), HTR1B(6), TPH2(8), HTR5A(9), HTR3A(11), SLC6A2(13), HTR7(14), SLC6A3(15), TPH1(16), MAOA(17), HTR3B(19), HTR4(20), SLC6A1(31), DRD4(38), ADRA2B(50), GNB3(55), DRD2(66), DRD3(69), ABCB1(79), DTNBP1(80), ADRA2C(82), IL6(95), COMT(99), DRD1(110), TNF(112), DAOA(113), ACE(114), APOE(116), TH(133), IL1B(140), DDC(142), ADRA2A(144), MTHFR(147), GRIK3(153), AGTR1(158), NOS3(181), ADRB1(185), CYP2C9(186), CTLA4(202), BDNF(204), GNAS(206), ESR1(212), GPR50(233), DRD5(235), ADRA1A(259), TACR1(261), TAC1(297), SERPINA3(322), GABRA6(334), GABRA3(341), LEPR(350), ADRA1B(376), MAOB(395), GRIA3(399), NR3C1(407), GABBR1(417), WFS1(424), POMC(435), GRIA4(455), PENK(467), CACNA1C(470), GAD1(499), ESR2(506), ADORA2A(522), LEP(540), CRHR1(541), AVPR1A(568), CNR1(579), ITPR1(597), CCKBR(642), GRM7(660), CHRM2(667), GRIN1(680), NOS1(688), CCL2(701), AR(702), GRIA1(740), CCKAR(747), CRHR2(759), CREB1(762), FZD3(781), ADCY9(860), NPY(872), FGFR2(873), GABRA5(932), SYN3(934), MMP2(1003), GNAL(1010), OPRM1(1011), AVPR1B(1073), GRIN2B(1135), GMIP(1168), GRIK4(1233), GRIN2A(1312), CHRNA7(1451), NFKB1(1497), GRIN2D(1523), CCK(1625), AKT1(1633), P2RX7(1646), GSK3B(1673), FGFR3(1677), ROS1(1729), DISC1(1878), OPRK1(1927)    |
| MAOA   | 1.54E-69 | MAOB(1), SLC6A4(4), HTR2A(5), HTR1B(8), HTR1A(10), HTR6(12), TPH2(18), HTR2C(22), HTR2B(23), DRD4(27), SLC6A2(30), HTR3A(31), HTR5A(35), SLC6A3(39), DRD2(45), TPH1(47), COMT(49), DRD3(53), HTR7(54), IL6(73), ADRA2B(74), DRD1(79), TH(83), ADRA2C(89), TNF(100), ADRA2A(102), APOE(110), GNB3(116), HTR4(120), GRIK3(124), DTNBP1(129), IL1B(141), DRD5(153), DAOA(155), ACE(156), ABCB1(161), ESR1(162), AGTR1(179), NOS3(185), ADRB1(196), DDC(208), HTR3B(249), LEPR(251), PENK(262), BDNF(265), GNAS(274), CTLA4(286), CYP2C9(292), GABBR1(293), POMC(314), ADRA1A(316), SERPINA3(328), GAD1(330), GABRA3(331), MTHFR(337), LEP(361), TACR1(365), ADRA1B(371), AR(383), TAC1(389), NR3C1(399), GRIA4(418), CCKBR(467), ESR2(477), GRIA3(487), NOS1(493), CRHR1(516), ADORA2A(550), GABRA6(557), GRIN1(579), MMP2(630), CREB1(697), GRIA1(720), GPR50(740), CHRM2(761), ADCY9(788), NPY(790), CRHR2(836), FZD3(870), FGFR2(879), CNR1(918), AVPR1B(922), CCKAR(931), AVPR1A(950), WFS1(985), ITPR1(1000), NFKB1(1055), CCL2(1214), GRM7(1218), CACNA1C(1286), CCND2(1290), OPRM1(1336), AKT1(1410), GRIN2A(1456), GRIK4(1472), GABRA5(1480), SLC6A1(1517), GRIN2B(1622), ACSL4(1637), GSK3B(1666), GRIN2D(1672), GRIN2C(1771), GNAL(1822), ROS1(1885), GMIP(1899), CHRNA7(1922), FGFR3(1927), CCK(1975) |
| ADRA2A | 7.15E-68 | ADRA2C(1), ADRA2B(2), ADRA1A(3), ADRA1B(4), ADRB1(6), ADORA2A(9), HTR2A(10), AR(15), HTR1A(21), DRD1(22), HTR1B(28), TNF(31), DRD2(32), HTR2C(33), SLC6A2(36), DRD3(38), ESR1(44), HTR2B(45), OPRM1(46), CHRM2(48), GNAS(53), AGTR1(56), IL6(60), DRD5(63), TACR1(67), HTR6(71), OPRD1(77), HTR3A(80),                                                                                                                                                                                                                                                                                                                                                                                                                                                                                                                                                                                                                                                                                                                                                                                                                                                                                                                                                                                                        |



|      |          |                                                                                                                                                                                                                                                                                                                                                                                                                                                                                                                                                                                                                                                                                                                                                                                                                                                                                                                                                                                                                                                                                                                                                                                                                                                                                                              |
|------|----------|--------------------------------------------------------------------------------------------------------------------------------------------------------------------------------------------------------------------------------------------------------------------------------------------------------------------------------------------------------------------------------------------------------------------------------------------------------------------------------------------------------------------------------------------------------------------------------------------------------------------------------------------------------------------------------------------------------------------------------------------------------------------------------------------------------------------------------------------------------------------------------------------------------------------------------------------------------------------------------------------------------------------------------------------------------------------------------------------------------------------------------------------------------------------------------------------------------------------------------------------------------------------------------------------------------------|
|      |          | <p>HTR5A(92), OPRK1(93), GABRA3(102), CCKBR(116), HTR7(127), TH(130), ESR2(134), ADCY9(135), GRM7(137), CACNA1C(141), GABRA6(144), CCKAR(153), IL1B(162), HTR4(179), SLC6A3(187), CNR1(190), CRHR2(195), POMC(197), LEPR(203), GRIN2A(206), DRD4(208), LEP(213), SLC6A4(220), GRIA4(221), CRHR1(224), GRIA3(226), GABBR1(227), NR3C1(231), GRIN1(234), ITPR1(235), GRIN2D(239), GNAL(255), GRIA1(264), TAC1(269), SERPINA3(276), GABRA5(282), NOS3(292), VGLL4(298), CHRNA7(300), AVPR1A(307), APOE(317), GNB3(319), PENK(323), GRIN2C(330), AVPR1B(356), CREB1(366), GRIK3(372), AKT1(385), NPY(415), MAOA(455), NOS1(460), GRIN2B(468), P2RX7(476), ABCB1(499), NFKB1(555), LRP1(615), GRIA2(669), FGFR2(684), MMP2(760), P2RX4(790), TPH2(809), GSK3B(866), NGFR(928), BDNF(973), GRIK1(984), CCK(1031), GRIK2(1070), CTLA4(1090), GRIN3A(1109), ACE(1116), PLA2G4A(1167), FGFR1(1194), GPR50(1197), PDE2A(1251), GRIK4(1293), ROS1(1309), CCL2(1322), GAD1(1389), CYP2C9(1450), DTNBP1(1519), STAT3(1556), FGFR3(1583), GRIK5(1640), HTR3B(1649), TPH1(1682), GSK3A(1759), FGFR4(1805), PRKCH(1817), SLC6A1(1907)</p>                                                                                                                                                                                    |
| HTR6 | 7.16E-68 | <p>HTR2A(1), HTR2B(2), HTR5A(3), HTR2C(5), HTR7(6), HTR1A(7), HTR3A(8), HTR1B(10), SLC6A4(11), HTR3B(13), HTR4(14), TPH2(16), ADRA2B(21), TPH1(22), MAOA(36), DRD1(37), GRIK3(40), GNAS(44), IL6(51), ADRA2C(53), ADCY9(54), ADRB1(55), ADRA2A(56), DRD2(57), ADRA1A(58), DRD3(59), GRIA4(61), DRD5(70), ADORA2A(71), DTNBP1(72), ITPR1(74), AGTR1(76), ADRA1B(93), GRIA3(103), DRD4(121), GPR50(125), CCKBR(140), DAOA(141), GNAL(145), GABRA6(152), TACR1(162), CHRM2(170), GNB3(181), ESR1(184), GRIN1(187), GABRA3(191), GABBR1(193), NR3C1(210), TNF(212), GRIK4(239), GRIN2D(248), OPRD1(259), FGFR2(286), CRHR1(292), APOE(301), GRIA1(312), CCKAR(331), GRIN2B(334), OPRK1(335), IL1B(341), GRIN2A(356), GRIN2C(362), SERPINA3(368), TH(399), FZD3(409), CACNA1C(417), GRM7(426), CNR1(440), SLC6A2(441), CRHR2(454), AVPR1B(456), LEPR(459), ESR2(470), AVPR1A(472), AR(497), CTLA4(500), GABRA5(562), DDC(596), CHRNA7(643), GRIK1(656), LRP1(667), SLC6A3(670), OPRM1(690), P2RX7(700), GRIK2(708), TAC1(739), FGFR3(771), CHRFBAM7A(772), FGFR1(823), ABCB1(921), FGFR4(959), GRIA2(993), M6PR(1026), GRIN3A(1092), GRIK5(1098), POMC(1148), COMT(1278), ACE(1311), NOS3(1388), PSMB4(1418), BDNF(1506), CCL2(1528), LEP(1579), CYP2C9(1590), NPY(1617), GAD1(1687), PDE1A(1695), ROS1(1807)</p> |
| HTR4 | 2.39E-66 | <p>HTR7(1), HTR2B(2), HTR6(3), HTR5A(4), HTR1A(5), HTR3A(6), HTR2A(7), HTR1B(10), HTR2C(11), HTR3B(12), SLC6A4(14), TPH2(16), ADRA1A(17), ADRA2B(19), DRD1(23), ADRB1(29), ADRA2C(37), CNR1(43), ADRA2A(47), ITPR1(49), GABBR1(50), ADORA2A(51), GRIA4(53), DRD2(54), DRD3(61), ADRA1B(62), DRD5(65), GRIA3(67), GRM7(70), CCKBR(73), TACR1(76), ADCY9(87), TPH1(88), GRIN1(95), GRIK3(100), CHRM2(105), OPRK1(108), PDE1A(110), GNAS(111), AGTR1(114), CRHR2(115), OPRD1(116), NR3C1(122), GRIA1(128), AVPR1B(133), CRHR1(136), CACNA1C(145), ESR1(171), OPRM1(200), MAOA(206), CCKAR(207), GRIN2D(208), AVPR1A(217), FGFR2(218), GABRA6(237), ESR2(238), GRIN2C(252), GABRA3(253), GRIN2B(283), GRIN2A(300), TH(308), GRIA2(315), GNAL(327), IL6(330), TAC1(334), LEPR(343), TNF(355), P2RX7(363), GABRA5(374), GRIK1(381), GRIK4(404), GRIK2(437), IL1B(496), FGFR4(516), GPR50(524), AR(525), P2RX4(535), FGFR1(550), POMC(565), DRD4(567), CHRNA7(583), SLC6A2(586), GRIN3A(607), CREB1(624), PENK(670), PDE11A(715), DDC(792), PDE9A(800), FGFR3(874), GRIK5(891), LRP1(983), GAD1(1011), ABCB1(1129), AKT1(1152), PDE10A(1182), CHRFBAM7A(1187), DTNBP1(1342),</p>                                                                                                                                    |

|        |          |                                                                                                                                                                                                                                                                                                                                                                                                                                                                                                                                                                                                                                                                                                                                                                                                                                                                                                                                                                                                                                                                                                                                                                                                                                                                                                                                                                |
|--------|----------|----------------------------------------------------------------------------------------------------------------------------------------------------------------------------------------------------------------------------------------------------------------------------------------------------------------------------------------------------------------------------------------------------------------------------------------------------------------------------------------------------------------------------------------------------------------------------------------------------------------------------------------------------------------------------------------------------------------------------------------------------------------------------------------------------------------------------------------------------------------------------------------------------------------------------------------------------------------------------------------------------------------------------------------------------------------------------------------------------------------------------------------------------------------------------------------------------------------------------------------------------------------------------------------------------------------------------------------------------------------|
|        |          | SLC6A3(1414), LEP(1434), BDNF(1469), NPY(1498), APOE(1535), ROS1(1588), NFKB1(1596), FZD3(1609), NTRK2(1640), CCK(1651), NOS1(1706), NGFR(1729), PRKCH(1788), ANK3(1821), CTLA4(1822), PDE5A(1890), SERPINA3(1926)                                                                                                                                                                                                                                                                                                                                                                                                                                                                                                                                                                                                                                                                                                                                                                                                                                                                                                                                                                                                                                                                                                                                             |
| TACR1  | 2.46E-66 | TAC1(1), IL6(17), HTR3A(22), HTR1A(23), DRD1(27), HTR1B(32), TNF(38), IL1B(39), HTR2A(41), GABBR1(44), ADRA2B(48), ADORA2A(50), AGTR1(64), DRD2(67), GRIA3(73), DRD3(78), ADRB1(79), ADRA2A(80), HTR2C(86), ADRA2C(87), GRIN1(90), GRIA1(103), CCKBR(104), CHRM2(110), HTR2B(113), CRHR1(117), OPRM1(120), ADRA1A(121), ADRA1B(125), ITPR1(136), HTR7(142), CRHR2(145), GRM7(146), GRIN2C(149), ESR1(150), GRIA4(155), GRIN2D(162), CNR1(163), ABCB1(166), GRIN2A(178), TH(181), LEPR(186), PENK(187), OPRD1(188), NGFR(190), OPRK1(202), HTR5A(210), NR3C1(217), P2RX7(228), GRIK3(244), AVPR1A(253), NPY(256), CCKAR(260), GRIN2B(279), NFKB1(297), POMC(303), ESR2(309), GABRA6(310), GABRA3(321), NOS1(330), DRD5(335), HTR6(336), HTR4(340), GRIA2(343), NOS3(388), FGFR2(404), LEP(431), AVPR1B(434), GRIK1(436), AKT1(439), CREB1(446), P2RX4(463), CACNA1C(489), FGFR1(490), BDNF(506), APOE(517), SLC6A4(564), MMP2(574), GAD1(576), CCL2(594), GRIN3A(599), AR(656), NTRK2(660), GABRA5(668), LRP1(686), NTRK3(754), GRIK2(783), CHRNA7(811), GNAS(813), GRIK4(827), SLC6A2(832), FGFR4(834), CCK(892), GRIK5(979), FGFR3(1039), SERPINA3(1048), CTLA4(1087), STAT3(1158), HTR3B(1236), CD3E(1247), SLC6A1(1249), GSK3B(1328), ADCY9(1409), SLC6A3(1423), ROS1(1452), DRD4(1502), PLA2G2A(1514), PLA2G4A(1681), PRKCH(1815), CCND2(1850), MAOA(1970) |
| ADRA2B | 5.58E-64 | ADRA2C(1), ADRA2A(2), ADRA1A(4), ADRB1(5), ADRA1B(6), HTR2B(10), HTR2A(15), AR(16), HTR2C(21), ADORA2A(24), HTR1A(25), TNF(27), AGTR1(32), DRD1(34), HTR6(41), GNAS(42), DRD2(49), ADCY9(50), HTR5A(52), ESR1(56), CHRM2(57), HTR1B(61), HTR3A(63), IL6(64), GNB3(71), DRD5(73), DRD3(76), SLC6A2(89), GABRA3(93), HTR7(98), GRIA4(120), GABRA6(122), TACR1(127), GRIA3(131), LEPR(132), CCKAR(136), GRIK3(137), SLC6A4(152), SERPINA3(156), IL1B(157), ACE(158), GRM7(161), CACNA1C(170), ITPR1(176), CCKBR(179), ESR2(185), HTR4(188), TH(189), LEP(201), VGLL4(220), NOS3(221), NR3C1(230), GABBR1(248), OPRD1(264), CRHR2(275), GRIN2C(289), TAC1(303), GRIN2D(310), AVPR1A(311), GRIN2B(316), CRHR1(320), OPRK1(327), APOE(328), GRIN1(343), POMC(368), GPR50(375), FGFR2(377), AVPR1B(378), GRIA1(388), GNAL(411), GABRA5(428), GRIN2A(486), OPRM1(499), ABCB1(519), DRD4(524), CHRNA7(544), CNR1(582), NPY(615), P2RX7(629), CYP2C9(673), LRP1(744), MMP2(757), NOS1(763), CTLA4(779), GRIK4(849), AKT1(909), CREB1(1019), FGFR1(1068), PENK(1095), GRIA2(1103), GRIK1(1125), P2RX4(1181), MAOA(1182), ROS1(1193), CCL2(1274), MTHFR(1305), GAD1(1349), NFKB1(1387), FGFR4(1394), FGFR3(1453), GRIK2(1478), GRIN3A(1502), SLC6A3(1553), TPH2(1597), PLA2G4A(1621), NGFR(1746), CCK(1865), GRIK5(1913), HTR3B(1933), GSK3B(1943)                         |
| SLC6A3 | 3.33E-63 | DRD2(1), DRD3(2), DRD1(3), DRD4(4), SLC6A2(5), DRD5(6), SLC6A4(7), TH(10), SLC6A1(16), HTR1B(32), HTR2A(39), MAOA(49), ADRA2A(60), HTR1A(71), ADRA2C(77), TPH2(83), COMT(89), ABCB1(98), HTR2C(101), ADORA2A(103), IL6(104), DTNBP1(111), ADRA2B(114), DDC(125), TNF(129), PENK(147), APOE(153), HTR6(175), GRIA1(181), IL1B(184), ESR1(191), ADRA1B(192), GRIK3(201), MAOB(205), ADRB1(211), DAOA(228), AGTR1(236), BDNF(239), GRIN1(248), GAD1(257), TAC1(258), GABBR1(260), HTR3A(261), CNR1(267), TPH1(269), GRIA4(270), GABRA3(273), TACR1(282), OPRM1(295), CCKBR(303), ADRA1A(317), HTR5A(321),                                                                                                                                                                                                                                                                                                                                                                                                                                                                                                                                                                                                                                                                                                                                                         |

|        |          |                                                                                                                                                                                                                                                                                                                                                                                                                                                                                                                                                                                                                                                                                                                                                                                                                                                                                                                                                                                                                                                                                                                                                                                                                                                                                                                                                                                                                                         |
|--------|----------|-----------------------------------------------------------------------------------------------------------------------------------------------------------------------------------------------------------------------------------------------------------------------------------------------------------------------------------------------------------------------------------------------------------------------------------------------------------------------------------------------------------------------------------------------------------------------------------------------------------------------------------------------------------------------------------------------------------------------------------------------------------------------------------------------------------------------------------------------------------------------------------------------------------------------------------------------------------------------------------------------------------------------------------------------------------------------------------------------------------------------------------------------------------------------------------------------------------------------------------------------------------------------------------------------------------------------------------------------------------------------------------------------------------------------------------------|
|        |          | GRIA3(328), GNAS(339), NOS3(340), CREB1(341), GNB3(372), GNAL(375), LEPR(381), POMC(393), HTR2B(419), CHRM2(438), GRIN2A(449), CTLA4(450), NR3C1(472), CCKAR(482), ACE(507), NOS1(512), ESR2(531), LEP(552), GRIN2C(555), GABRA6(563), ADCY9(565), CRHR1(585), SERPINA3(603), CYP2C9(615), HTR7(616), GRM7(617), SYN3(645), NPY(684), GRIN2D(697), AR(705), HTR4(713), OPRK1(719), AKT1(728), GRIN2B(738), MTHFR(755), ITPR1(762), CRHR2(769), CHRNA7(793), GSK3B(798), CACNA1C(844), MMP2(898), FGFR2(953), GRIK4(968), GABRA5(978), CCND2(989), CCK(990), OPRD1(1016), PDE10A(1070), P2RX7(1109), AVPR1B(1131), NFKB1(1134), WFS1(1204), ROS1(1228), FZD3(1251), CCL2(1279), AVPR1A(1348), GRIA2(1373), GPR50(1620), NGFR(1630), LRP1(1642), FGFR3(1681), PRKCH(1727), GRIK2(1900), MYO5B(1915)                                                                                                                                                                                                                                                                                                                                                                                                                                                                                                                                                                                                                                       |
| CNR1   | 3.88E-63 | DRD1(3), ZNF804A(6), DRD2(7), HTR1B(8), ADORA2A(10), HTR1A(13), DRD3(16), HTR3A(18), GRIA1(19), GABBR1(23), TACR1(25), GRM7(27), OPRM1(29), HTR4(31), GRIA3(35), GRIN1(36), ADRA2B(37), ADRA2A(39), OPRK1(41), HTR2A(43), HTR2C(44), OPRD1(46), PENK(50), CHRM2(55), CCKBR(56), ADRB1(57), GRIA4(58), GRIK3(63), DRD5(66), CRHR1(68), ADRA2C(69), AGTR1(73), IL6(76), GRIN2C(82), GRIN2A(83), HTR5A(87), GABRA6(88), GABRA3(90), HTR7(95), GRIN2D(97), ITPR1(98), HTR2B(99), TAC1(100), CRHR2(101), ADRA1B(103), TNF(104), ADRA1A(106), GRIN2B(112), ESR1(114), GRIA2(117), LEPR(123), GABRA5(129), HTR6(131), TH(132), NR3C1(150), IL1B(156), P2RX7(157), CCKAR(168), LEP(172), BDNF(188), GRIK1(193), POMC(198), AVPR1A(209), ESR2(216), CREB1(219), SLC6A4(235), NPY(237), AVPR1B(268), AKT1(275), SLC6A3(280), GNAS(284), APOE(292), GAD1(296), GRIN3A(302), GRIK2(305), ADCY9(317), SLC6A2(318), NOS1(327), FGFR2(331), CACNA1C(332), GRIK4(336), NTRK2(338), NGFR(345), GRIK5(348), DRD4(383), CHRNA7(396), NFKB1(433), ABCB1(440), SLC6A1(450), AR(464), NOS3(531), FGFR1(563), P2RX4(570), LRP1(618), GNAL(718), CCK(732), MMP2(761), HTR3B(811), GSK3B(867), FGFR3(950), MAOA(964), FGFR4(983), ROS1(1002), NTRK3(1022), STAT3(1087), CTLA4(1095), PDE10A(1198), CCL2(1203), SERPINA3(1413), CCND2(1494), TPH2(1561), CRHBP(1574), FZD3(1666), PLA2G4A(1704), DTNBP1(1801), KCNC2(1808), PDE1A(1827), GPR50(1904), PRKCH(1969) |
| ADRA2C | 1.16E-61 | ADRA2A(1), ADRA2B(2), ADRA1B(4), ADRA1A(5), ADRB1(6), AR(10), HTR2C(11), HTR2A(13), HTR1B(18), HTR1A(19), ADORA2A(20), HTR2B(21), DRD1(25), DRD2(30), HTR3A(33), SLC6A2(37), GABRA3(41), HTR5A(43), TNF(45), CHRM2(47), GRM7(50), DRD5(51), DRD3(52), ESR1(72), GNAS(74), HTR7(80), HTR6(81), TH(86), TACR1(88), GRIA3(92), AGTR1(99), IL6(121), GABRA6(122), SLC6A4(125), GRIA4(131), CACNA1C(136), GABBR1(138), GRIA1(149), CCKBR(154), CCKAR(157), ESR2(163), GRIK3(165), GRIN2C(167), HTR4(168), ADCY9(173), GABRA5(179), NR3C1(181), GRIN2D(198), GRIN1(199), CRHR2(209), VGLL4(212), AVPR1B(223), CRHR1(224), IL1B(227), ITPR1(237), TAC1(242), SLC6A3(294), OPRK1(301), CHRNA7(306), GRIN2A(336), POMC(343), DRD4(344), OPRD1(346), CNR1(355), PENK(356), AVPR1A(364), SERPINA3(365), CREB1(400), GRIN2B(405), OPRM1(416), GNAL(432), FGFR2(461), LEPR(473), APOE(510), MAOA(546), GAD1(566), NOS3(582), NPY(594), GRIA2(605), AKT1(615), GRIK1(638), P2RX7(646), ABCB1(698), LEP(711), NOS1(714), TPH2(749), GRIK4(787), GNB3(822), NFKB1(937), CYP2C9(1031), LRP1(1040), BDNF(1068), NGFR(1079), P2RX4(1122), GRIK2(1195), MMP2(1217), FGFR1(1228), DTNBP1(1311), GSK3B(1335), HTR3B(1451), CCK(1459), FGFR4(1480), FGFR3(1487), ROS1(1541), GRIN3A(1546), TPH1(1629), SLC6A1(1705), GRIK5(1707), DDC(1737),                                                                                                                   |

|         |          |                                                                                                                                                                                                                                                                                                                                                                                                                                                                                                                                                                                                                                                                                                                                                                                                                                                                                                                                                                                                                                                                                                                                                                                                                                                                                                                                                                                                                        |
|---------|----------|------------------------------------------------------------------------------------------------------------------------------------------------------------------------------------------------------------------------------------------------------------------------------------------------------------------------------------------------------------------------------------------------------------------------------------------------------------------------------------------------------------------------------------------------------------------------------------------------------------------------------------------------------------------------------------------------------------------------------------------------------------------------------------------------------------------------------------------------------------------------------------------------------------------------------------------------------------------------------------------------------------------------------------------------------------------------------------------------------------------------------------------------------------------------------------------------------------------------------------------------------------------------------------------------------------------------------------------------------------------------------------------------------------------------|
|         |          | KCNC2(1781), CTLA4(1824), PDE1A(1843), FZD3(1891)                                                                                                                                                                                                                                                                                                                                                                                                                                                                                                                                                                                                                                                                                                                                                                                                                                                                                                                                                                                                                                                                                                                                                                                                                                                                                                                                                                      |
| ADORA2A | 7.70E-61 | ADRA2A(5), DRD1(7), DRD2(8), HTR2A(9), ADRA2B(10), ADRA2C(12), DRD3(15), ADRB1(16), IL6(20), HTR1A(27), TNF(28), HTR1B(30), DRD5(31), ADRA1B(35), ADRA1A(36), TACR1(42), HTR2B(51), HTR3A(53), HTR2C(57), IL1B(62), AGTR1(63), P2RX7(68), CNR1(72), CHRM2(80), GRIA3(82), GRM7(84), GRIN1(86), HTR7(89), HTR5A(98), HTR6(99), OPRD1(100), GRIN2C(101), CCKBR(103), GRIN2A(104), OPRK1(109), GRIA4(110), GABBR1(111), OPRM1(113), ITPR1(122), GRIA1(123), TAC1(133), GNAL(134), GRIN2D(137), ESR1(158), CRHR1(168), CRHR2(170), TH(174), CREB1(175), HTR4(176), GRIN2B(190), GRIK3(205), AR(235), LEPR(236), NR3C1(237), NFKB1(255), GRIA2(256), AKT1(271), CCKAR(274), AVPR1A(278), GABRA6(279), GABRA3(285), POMC(294), PENK(306), GNAS(314), ESR2(316), NOS3(325), GRIN3A(334), SLC6A3(340), P2RX4(342), AVPR1B(345), ADCY9(353), GRIK2(355), CACNA1C(368), APOE(383), NOS1(390), GRIK1(427), LEP(443), DRD4(456), SLC6A2(471), NPY(482), NGFR(487), MMP2(495), GABRA5(497), BDNF(505), CHRNA7(518), FGFR2(522), CCL2(524), PDE10A(596), FGFR1(644), PDE2A(668), ABCB1(701), LRP1(711), SLC6A4(721), GRIK5(748), GRIK4(770), PLA2G4A(772), STAT3(807), GSK3B(831), HTR3B(849), NTRK2(872), CTLA4(934), PLA2G2A(956), GAD1(991), FGFR4(1118), CCND2(1124), FGFR3(1186), CCK(1202), SERPINA3(1216), PDE1A(1352), PDE5A(1393), SLC6A1(1473), ROS1(1488), CD3E(1526), NTRK3(1528), PRKCH(1572), MAOA(1662), PDE11A(1859) |
| CRHR2   | 4.58E-60 | CRHR1(1), CRHBP(3), POMC(13), AVPR1B(20), HTR1A(23), HTR3A(29), ADRA2B(32), DRD1(34), HTR1B(42), TACR1(43), NR3C1(47), IL6(54), CCKBR(57), NPY(58), DRD2(59), GABBR1(68), AGTR1(72), ADRA1B(73), ADRB1(74), ADORA2A(75), ADRA2C(76), ADRA1A(78), HTR2C(82), ADRA2A(83), HTR2B(85), HTR2A(87), TNF(88), DRD3(89), ITPR1(90), GRM7(95), GRIA3(109), TH(112), CREB1(113), ESR1(118), AVPR1A(120), LEPR(138), HTR5A(139), PENK(147), ADCY9(167), HTR7(171), IL1B(172), TAC1(174), GRIN1(177), LEP(193), CHRM2(194), GABRA6(195), DRD5(197), HTR4(199), ESR2(203), CNR1(212), FGFR2(222), GRIN2C(224), GRIA1(231), GRIK3(232), GRIA4(236), CCKAR(242), GNAS(245), GRIN2D(274), GABRA3(283), OPRK1(290), HTR6(292), CACNA1C(321), OPRM1(353), OPRD1(374), AKT1(382), GRIN2A(420), GRIN2B(430), FGFR1(460), NFKB1(504), P2RX7(522), GRIA2(535), NOS1(565), FGFR4(572), NGFR(592), BDNF(593), AR(621), GAD1(650), P2RX4(671), SLC6A4(725), GABRA5(729), GRIK5(750), LRP1(773), CCK(807), APOE(812), GRIN3A(849), GRIK1(875), GRIK4(927), NTRK2(934), FGFR3(943), SLC6A2(1001), GRIK2(1002), MMP2(1020), ROS1(1068), TPH2(1189), CHRNA7(1209), GSK3B(1213), PDE1A(1264), NOS3(1275), STAT3(1355), CCL2(1447), GNAL(1484), ABCB1(1488), DRD4(1526), NTRK3(1690), PRKCH(1909), GPR50(1919), SLC6A3(1942), MAOA(1966)                                                                                                              |
| CRHR1   | 4.58E-60 | CRHR2(1), CRHBP(3), POMC(11), AVPR1B(14), HTR1A(27), NR3C1(30), DRD1(37), HTR3A(43), CCKBR(46), ITPR1(49), IL6(52), AGTR1(53), TACR1(55), ADRA2B(61), DRD2(62), HTR1B(68), TNF(69), ADRB1(71), NPY(72), GABBR1(75), ADRA1B(77), ESR1(79), ADRA1A(85), AVPR1A(91), DRD3(93), ADCY9(94), HTR2C(97), HTR2A(101), ADORA2A(102), GNAS(107), CREB1(110), TH(114), ADRA2C(117), GRM7(120), ADRA2A(144), PENK(154), LEPR(160), GRIN1(164), IL1B(165), TAC1(169), ESR2(175), HTR5A(195), HTR2B(196), CNR1(201), CCKAR(205), GRIA3(206), LEP(219), CHRM2(222), FGFR2(229), HTR7(232), GRIN2C(237), GRIA1(252), DRD5(255), GRIA4(262), OPRK1(268), HTR6(270), GABRA6(271), GRIK3(274), HTR4(305), AKT1(322), OPRD1(342), GRIN2D(352), OPRM1(358), GABRA3(389), FGFR1(415),                                                                                                                                                                                                                                                                                                                                                                                                                                                                                                                                                                                                                                                        |

|        |          |                                                                                                                                                                                                                                                                                                                                                                                                                                                                                                                                                                                                                                                                                                                                                                                                                                                                                                                                                                                                                                                                                                                                                                                                                                                                                                                                                                                          |
|--------|----------|------------------------------------------------------------------------------------------------------------------------------------------------------------------------------------------------------------------------------------------------------------------------------------------------------------------------------------------------------------------------------------------------------------------------------------------------------------------------------------------------------------------------------------------------------------------------------------------------------------------------------------------------------------------------------------------------------------------------------------------------------------------------------------------------------------------------------------------------------------------------------------------------------------------------------------------------------------------------------------------------------------------------------------------------------------------------------------------------------------------------------------------------------------------------------------------------------------------------------------------------------------------------------------------------------------------------------------------------------------------------------------------|
|        |          | CACNA1C(431), GRIN2A(435), AR(437), NFKB1(440), NOS1(468), GRIN2B(478), FGFR4(490), P2RX7(548), APOE(568), CCK(607), LRP1(609), BDNF(637), GRIA2(648), NOS3(661), NGFR(680), SLC6A4(692), FGFR3(816), GAD1(834), MMP2(840), SLC6A2(884), GRIN3A(902), CCL2(944), ABCB1(972), GABRA5(975), P2RX4(986), ROS1(1019), GRIK5(1076), NTRK2(1156), GSK3B(1170), STAT3(1204), GPR50(1287), CHRNA7(1295), SERPINA3(1303), GRIK4(1306), GRIK2(1381), PRKCH(1412), DRD4(1431), GNAL(1478), GRIK1(1495), PDE1A(1523), PDE10A(1711), MAOA(1765), SLC6A3(1903), PLA2G4A(1922), CCND2(1997)                                                                                                                                                                                                                                                                                                                                                                                                                                                                                                                                                                                                                                                                                                                                                                                                             |
| CCKBR  | 1.23E-58 | CCKAR(1), CCK(2), DRD1(9), DRD2(12), DRD3(17), HTR1A(20), HTR3A(21), ADRA2B(27), GABBR1(35), TACR1(37), ADRB1(40), HTR1B(45), CRHR1(47), ADRA2A(54), ADORA2A(55), HTR2C(57), AGTR1(60), DRD5(63), ADRA1B(64), OPRD1(68), HTR2B(71), HTR2A(72), IL6(74), OPRK1(81), ADRA2C(82), ADRA1A(83), ESR1(84), OPRM1(90), CRHR2(92), HTR5A(110), ITPR1(112), LEPR(116), GRM7(127), TNF(130), HTR7(134), NR3C1(152), CHRM2(161), GRIA3(165), PENK(167), FGFR2(168), HTR6(171), POMC(185), AR(188), AVPR1B(190), HTR4(193), CNR1(197), IL1B(216), GRIA4(219), GRIN1(224), ESR2(225), AKT1(227), TH(228), TAC1(245), GABRA3(264), LEP(284), GABRA6(287), AVPR1A(288), GRIA1(295), GNAS(305), GRIK3(307), NFKB1(339), NPY(340), FGFR1(346), FGFR4(375), GRIN2D(390), GRIN2C(441), P2RX7(456), GRIN2A(484), ABCB1(578), FGFR3(618), CREB1(646), APOE(654), LRP1(664), CACNA1C(671), MMP2(720), GABRA5(739), GRIN2B(743), DRD4(753), GRIA2(765), CCND2(780), NGFR(826), ROS1(871), ADCY9(883), NOS3(927), NOS1(933), GAD1(1000), STAT3(1041), SLC6A4(1059), GNAL(1139), NTRK2(1172), GSK3B(1228), DUSP6(1258), SLC6A3(1263), P2RX4(1312), PRKCH(1330), BDNF(1396), SLC6A2(1414), CHRNA7(1426), PSMD9(1476), HTR3B(1525), GRIN3A(1527), CTLA4(1590), GRIK4(1631), CCL2(1712), CD3E(1800), SERPINA3(1839), GRIK1(1855), GRIK2(1857), GPR50(1867), PLA2G2A(1953)                                            |
| AVPR1A | 1.27E-58 | AVPR1B(1), HTR1A(9), ADRA1A(12), AGTR1(14), ADRA2B(19), DRD1(20), ADRA1B(21), CRHR1(27), HTR3A(29), ADRB1(31), HTR2A(34), TACR1(36), HTR1B(38), DRD2(43), DRD3(48), ITPR1(51), CRHR2(53), GABBR1(54), HTR2B(59), ADRA2C(60), ADORA2A(62), CACNA1C(63), ADRA2A(68), HTR2C(78), CCKBR(80), ESR1(83), GNAS(94), GRIA3(95), IL6(100), HTR7(101), CHRM2(106), CCKAR(110), NR3C1(111), DRD5(113), HTR5A(115), GRM7(128), GRIN1(134), GRIA4(135), HTR6(137), ESR2(138), POMC(142), TAC1(152), TNF(167), HTR4(169), LEPR(187), GRIK3(190), NPY(202), OPRK1(212), IL1B(216), GABRA3(219), OPRD1(230), PENK(235), CNR1(243), TH(252), GRIA1(261), GRIN2C(262), SLC6A4(269), GRIN2D(282), NOS1(287), NOS3(300), GABRA6(318), FGFR2(323), OPRM1(328), P2RX7(333), AR(357), GRIN2A(405), GRIN2B(434), LEP(436), ADCY9(525), GRIA2(528), P2RX4(541), LRP1(562), AKT1(564), GAD1(598), GRIN3A(602), ABCB1(604), CREB1(621), FGFR1(660), DRD4(686), PDE1A(700), APOE(712), SLC6A2(722), GRIK2(762), CRHBP(790), GRIK1(808), NGFR(875), GPR50(878), GABRA5(901), FGFR4(908), CHRNA7(924), NFKB1(931), GRIK4(957), MMP2(971), CCK(972), FGFR3(994), GNB3(1000), GRIK5(1045), SERPINA3(1091), ROS1(1128), MYO5B(1150), GNAL(1197), MAOA(1222), HTR3B(1255), ACE(1322), BDNF(1389), PLA2G4A(1483), CCL2(1516), CTLA4(1583), GSK3B(1627), NTRK2(1631), PLA2G2A(1754), SLC6A3(1844), SLC6A1(1894), STAT3(1934) |
| TPH2   | 3.97E-57 | TPH1(1), SLC6A4(2), HTR2A(3), HTR1A(4), HTR6(5), TH(6), HTR2B(7), HTR1B(8), HTR2C(9), HTR5A(10), HTR3A(13), HTR7(14), HTR4(29), HTR3B(30), MAOA(31),                                                                                                                                                                                                                                                                                                                                                                                                                                                                                                                                                                                                                                                                                                                                                                                                                                                                                                                                                                                                                                                                                                                                                                                                                                     |

|      |          |                                                                                                                                                                                                                                                                                                                                                                                                                                                                                                                                                                                                                                                                                                                                                                                                                                                                                                                                                                                                                                                                                                                                                                                                                                                                      |
|------|----------|----------------------------------------------------------------------------------------------------------------------------------------------------------------------------------------------------------------------------------------------------------------------------------------------------------------------------------------------------------------------------------------------------------------------------------------------------------------------------------------------------------------------------------------------------------------------------------------------------------------------------------------------------------------------------------------------------------------------------------------------------------------------------------------------------------------------------------------------------------------------------------------------------------------------------------------------------------------------------------------------------------------------------------------------------------------------------------------------------------------------------------------------------------------------------------------------------------------------------------------------------------------------|
|      |          | DTNBP1(35), DAOA(37), SLC6A2(56), DRD4(58), SLC6A3(65), DRD3(91), DDC(92), ADRA2B(97), GPR50(98), ADRA2C(111), COMT(129), IL6(134), WFS1(137), DRD2(138), GNB3(139), ABCB1(144), TNF(168), BDNF(176), ADRA2A(190), GAD1(199), ACE(200), GRIK3(213), CYP2C9(222), IL1B(242), CTLA4(243), GNAS(244), FZD3(245), GABRA3(272), APOE(277), DRD1(281), ESR1(285), ADCY9(301), PER3(307), DISC1(339), ADRB1(341), PENK(356), MTHFR(378), TAC1(392), NR3C1(395), AGTR1(398), GMIP(415), POMC(416), DRD5(428), CRHR2(447), GRIA3(479), NOS3(481), LEPR(485), GNAL(513), SERPINA3(546), SYN3(555), GRIA4(565), GRIK4(607), ESR2(612), FGFR2(746), SLC25A21(748), GABBR1(763), GABRA6(770), TACR1(795), NOS1(847), MAOB(889), ADRA1A(910), PDE1A(913), CACNA1C(940), CLOCK(978), CRHR1(997), ADRA1B(1089), CCKBR(1112), LEP(1137), GRIN1(1236), CRHBP(1245), PER2(1270), NPY(1342), AVPR1B(1345), AR(1357), PDE9A(1429), GABRA5(1442), PER1(1477), CREB1(1578), CCL2(1586), PHACTR3(1600), ITPR1(1609), MMP2(1631), GRM7(1663), ADORA2A(1722), PDE11A(1727), FGFR3(1732), FGFR4(1734), CNR1(1870), AVPR1A(1985)                                                                                                                                                                 |
| DRD5 | 2.17E-56 | DRD1(1), DRD2(2), DRD3(3), SLC6A3(5), DRD4(6), TH(12), ADRA2B(13), ADORA2A(17), HTR1B(18), ADRA2C(19), HTR1A(20), ADRA2A(29), ADRA1A(33), HTR5A(34), ADRB1(39), HTR2A(40), ADRA1B(44), HTR2C(45), GRIA1(49), HTR3A(52), HTR6(53), HTR2B(54), ADCY9(59), GRIN1(60), GRIA4(62), CCKBR(65), GABBR1(73), CCND2(74), CHRM2(76), GRIA3(81), HTR7(88), GABRA3(93), GNAS(95), SLC6A2(106), GRIK3(111), GRIN2C(112), AGTR1(116), HTR4(129), GRIN2A(130), GRIN2D(136), GNAL(139), GRM7(146), TACR1(147), CNR1(166), ITPR1(168), ESR1(179), DDC(182), OPRD1(187), OPRK1(190), OPRM1(192), AVPR1B(217), CREB1(218), CRHR1(230), CCKAR(232), GABRA6(240), CRHR2(246), GABRA5(247), SLC6A4(252), GRIN2B(267), FGFR2(282), NR3C1(295), IL6(302), AVPR1A(309), PENK(314), GRIK4(348), GRIA2(356), TNF(402), GAD1(416), ESR2(427), ROS1(475), GRIK1(484), TAC1(524), MAOA(584), CHRNA7(600), GRIK2(665), IL1B(700), AR(720), PSMD9(769), GRIN3A(789), LEPR(807), P2RX7(816), FGFR1(853), BDNF(888), POMC(934), FGFR3(971), CACNA1C(992), PDE10A(1021), GRIK5(1260), DTNBP1(1295), GPR50(1400), FGFR4(1485), AKT1(1503), HTR3B(1519), NTRK2(1545), NGFR(1550), APOE(1563), GSK3B(1590), LRP1(1599), P2RX4(1618), NOS1(1647), CCK(1846), PDE1A(1850), NPY(1888), MAOB(1905), TPH2(1926) |
| NPY  | 1.15E-55 | LEP(8), LEPR(14), POMC(19), IL6(42), CRHR1(46), TAC1(47), CRHR2(50), TH(54), TACR1(60), ADRA2B(61), TNF(70), DRD1(75), PENK(85), DRD2(86), HTR1A(87), HTR2C(89), CCKAR(90), AGTR1(92), HTR2A(109), IL1B(110), DRD3(111), CCKBR(114), HTR1B(119), ESR1(120), APOE(124), ADRA2A(126), ADRA2C(127), ADRB1(133), GABBR1(138), CCK(151), ADORA2A(160), ADRA1B(168), NOS1(194), BDNF(201), HTR3A(202), GAD1(205), ADRA1A(212), AVPR1A(213), NR3C1(215), GRIA3(223), GRIN1(236), ESR2(238), NOS3(239), GRIA1(278), CNR1(292), GRIK3(296), CHRM2(303), GABRA6(313), GRM7(315), ITPR1(320), AVPR1B(324), GNAS(354), GRIN2C(355), GRIA4(373), ABCB1(397), CREB1(419), SLC6A4(435), SLC6A2(436), GABRA3(437), CACNA1C(438), OPRM1(440), NGFR(473), AKT1(483), HTR6(488), AR(490), ACE(551), MMP2(568), GRIN2D(569), GRIN2B(597), GNB3(607), CRHBP(608), DRD5(619), GRIN2A(640), SERPINA3(695), HTR7(700), HTR5A(708), P2RX7(748), FGFR2(767), NFKB1(777), GRIA2(796), HTR2B(808), GABRA5(828), ADCY9(886), NTRK2(887), CTLA4(907), SLC6A3(915), CCL2(926), OPRK1(950), MAOA(989), HTR4(994), GSK3B(1022), DRD4(1073), OPRD1(1117), STAT3(1131), SLC6A1(1137),                                                                                                                   |

|        |          |                                                                                                                                                                                                                                                                                                                                                                                                                                                                                                                                                                                                                                                                                                                                                                                                                                                                                                                                                                                                                                                                                                                                                                                                                                                                                                                                                                                                                         |
|--------|----------|-------------------------------------------------------------------------------------------------------------------------------------------------------------------------------------------------------------------------------------------------------------------------------------------------------------------------------------------------------------------------------------------------------------------------------------------------------------------------------------------------------------------------------------------------------------------------------------------------------------------------------------------------------------------------------------------------------------------------------------------------------------------------------------------------------------------------------------------------------------------------------------------------------------------------------------------------------------------------------------------------------------------------------------------------------------------------------------------------------------------------------------------------------------------------------------------------------------------------------------------------------------------------------------------------------------------------------------------------------------------------------------------------------------------------|
|        |          | GRIK4(1204), CHRNA7(1278), GRIN3A(1366), TPH2(1403), FGFR1(1405), CCND2(1435), P2RX4(1444), LRP1(1462), KCNC2(1484), GPR50(1491), CYP2C9(1582), GRIK1(1588), NTRK3(1591), CNTF(1676), DTNBP1(1679), MTHFR(1690), GRIK2(1713), FGFR4(1731), FGFR3(1791), PLA2G2A(1861), GRIK5(1900), TPH1(1959)                                                                                                                                                                                                                                                                                                                                                                                                                                                                                                                                                                                                                                                                                                                                                                                                                                                                                                                                                                                                                                                                                                                          |
| HTR5A  | 1.40E-55 | HTR2B(1), HTR6(2), HTR1A(4), HTR2A(5), HTR7(6), HTR3A(7), HTR2C(8), HTR1B(10), HTR3B(11), HTR4(13), SLC6A4(14), TPH2(17), ADRA2B(27), DRD1(39), ADRA2C(40), TPH1(44), ITPR1(47), ADRA1A(50), GRIA4(57), DRD5(62), GRIA3(64), GRIK3(68), DRD2(75), DRD3(78), ADRA2A(81), GABBR1(88), ADRA1B(89), ADORA2A(96), GABRA3(103), MAOA(104), GRIK4(105), ADRB1(106), GRM7(115), GABRA6(125), CCKBR(134), TACR1(136), GRIN1(139), GRIN2D(141), GRIA1(151), GABRA5(156), CHRM2(161), GNAL(162), OPRK1(169), GRIN2C(174), ADCY9(180), GNAS(195), OPRD1(200), AGTR1(223), CRHR1(229), CRHR2(243), AVPR1B(281), NR3C1(284), GRIN2A(300), CNR1(301), FGFR2(306), CACNA1C(309), FZD3(328), TH(330), ESR1(343), GRIN2B(347), GRIA2(406), GAD1(419), CCKAR(420), GRIN3A(426), GPR50(439), AVPR1A(465), IL6(487), GRIK1(498), OPRM1(508), DTNBP1(513), ESR2(517), TAC1(555), P2RX7(565), CHRNA7(620), GRIK5(661), TNF(734), SLC6A2(756), FGFR1(761), GRIK2(789), DDC(815), IL1B(857), PENK(928), DRD4(990), PDE1A(1005), OASL(1019), LEPR(1083), P2RX4(1101), AR(1166), FGFR4(1172), SLC6A1(1196), FGFR3(1310), POMC(1402), LRP1(1460), BDNF(1611), NGFR(1645), SLC6A3(1746)                                                                                                                                                                                                                                                              |
| OPRM1  | 6.44E-55 | OPRD1(1), OPRK1(2), PENK(8), DRD1(15), DRD2(19), ADRA2A(25), DRD3(30), POMC(31), TACR1(38), ADORA2A(40), CCKBR(46), CNR1(49), HTR1A(50), ADRA2B(53), HTR1B(54), HTR3A(55), HTR2A(62), ADRB1(69), ADRA1B(73), GRIN1(76), TAC1(78), DRD5(81), HTR2C(83), ADRA2C(84), IL6(86), GRIA3(90), ADRA1A(91), GABBR1(92), GRIA1(93), AGTR1(97), CHRM2(101), GRIA4(109), ESR1(116), CRHR1(119), GABRA6(127), HTR5A(130), GRIK3(131), GRIN2A(135), TNF(137), HTR2B(138), HTR7(140), NR3C1(143), HTR4(146), CREB1(147), TH(153), CRHR2(155), GRM7(156), ITPR1(159), GRIN2C(169), GRIN2D(187), IL1B(196), HTR6(197), GABRA3(199), CCKAR(226), ESR2(237), LEPR(239), AVPR1B(244), GRIN2B(246), AVPR1A(269), GNAS(272), GRIA2(277), SLC6A2(291), SLC6A3(299), GABRA5(303), FGFR2(306), P2RX7(320), ABCB1(324), NPY(337), CCK(355), DRD4(373), SLC6A4(386), NFKB1(388), NOS1(392), AR(428), NGFR(431), CACNA1C(439), APOE(457), GRIK1(470), ADCY9(473), CHRNA7(490), AKT1(511), GAD1(533), LEP(536), BDNF(552), GRIN3A(575), GRIK2(598), FGFR1(600), GRIK4(612), PRKCH(624), P2RX4(701), LRP1(709), NOS3(751), NTRK2(786), GRIK5(807), GNAL(815), FGFR4(913), FGFR3(960), GSK3B(1027), HTR3B(1119), SLC6A1(1127), ROS1(1149), NTRK3(1154), CTLA4(1200), STAT3(1214), MAOA(1247), CCL2(1262), GPR50(1328), MMP2(1383), PDE1A(1439), SERPINA3(1446), CCND2(1504), CD3E(1544), CYP2C9(1690), GNB3(1780), FZD3(1823), CRHBP(1870), TPH2(1914) |
| AVPR1B | 4.06E-54 | AVPR1A(1), POMC(7), CRHR1(13), ADRA1B(20), CRHR2(23), ADRA1A(25), CRHBP(27), HTR1B(31), HTR1A(38), ADRA2B(43), DRD1(44), HTR3A(45), DRD2(46), AGTR1(53), ESR1(60), ADRA2C(62), NR3C1(68), GNAS(72), HTR2B(74), CCKBR(81), HTR2A(85), ADRB1(88), ITPR1(89), GRM7(101), HTR2C(102), ESR2(104), DRD3(105), TACR1(114), DRD5(118), HTR5A(120), ADRA2A(129), CHRM2(132), ADORA2A(137), GABBR1(138), HTR4(152), HTR7(157), TH(158), GRIA3(172), IL6(177), GRIA4(190), HTR6(224), GRIN1(249), OPRK1(251), PENK(264), CCKAR(266), LEPR(268), FGFR2(270), CACNA1C(275), OPRD1(291), FGFR4(292), GRIA1(309), AR(313), GRIK3(320),                                                                                                                                                                                                                                                                                                                                                                                                                                                                                                                                                                                                                                                                                                                                                                                                 |

|       |          |                                                                                                                                                                                                                                                                                                                                                                                                                                                                                                                                                                                                                                                                                                                                                                                                                                                                                                                                                                                                                                                                                                                                                                                                                                        |
|-------|----------|----------------------------------------------------------------------------------------------------------------------------------------------------------------------------------------------------------------------------------------------------------------------------------------------------------------------------------------------------------------------------------------------------------------------------------------------------------------------------------------------------------------------------------------------------------------------------------------------------------------------------------------------------------------------------------------------------------------------------------------------------------------------------------------------------------------------------------------------------------------------------------------------------------------------------------------------------------------------------------------------------------------------------------------------------------------------------------------------------------------------------------------------------------------------------------------------------------------------------------------|
|       |          | GABRA3(323), GABRA6(324), GPR50(345), GRIN2D(348), GRIN2C(349), TNF(364), IL1B(385), CREB1(432), OPRM1(433), TAC1(452), NPY(462), CNR1(469), P2RX7(564), GRIN2A(597), FGFR1(625), GRIN2B(696), ADCY9(710), GRIK5(735), LEP(786), GRIA2(802), SLC6A4(803), SLC6A2(810), P2RX4(823), GNAL(906), GRIK4(928), LRP1(930), AKT1(960), ABCB1(976), GABRA5(1031), ROS1(1085), NOS1(1126), FGFR3(1154), GRIK2(1236), GRIN3A(1262), DRD4(1272), PDE1A(1279), GAD1(1288), GRIK1(1360), NGFR(1396), MYO5B(1475), APOE(1545), PRKCH(1599), CHRNA7(1648), CCK(1694), NFKB1(1699), MAOA(1838), PLA2G4A(1910)                                                                                                                                                                                                                                                                                                                                                                                                                                                                                                                                                                                                                                          |
| COMT  | 1.13E-52 | DAOA(1), DTNBP1(3), DRD4(6), SLC6A4(10), HTR2A(11), MAOA(13), DRD2(14), DRD3(15), GNB3(17), SLC6A3(21), MTHFR(29), ACE(30), TPH2(41), DRD1(42), MAOB(47), DISC1(58), APOE(61), IL6(69), ESR1(71), ADRA2B(72), TH(76), HTR6(83), TNF(92), CYP2C9(97), IL1B(111), TPH1(113), CTLA4(120), SLC6A2(121), ABCB1(128), GRIK3(134), SERPINA3(136), HTR1A(140), DRD5(143), GPR50(155), NOS3(167), GNAS(186), HTR1B(187), SYN3(191), AGTR1(193), FZD3(198), ADRB1(200), WFS1(205), ADRA2C(210), HTR2C(232), BDNF(257), ESR2(261), DDC(279), PENK(280), ADRA2A(300), HTR5A(309), CCL2(355), CHRFAM7A(366), ADCY9(384), GAD1(434), AR(441), LEPR(497), NR3C1(500), POMC(546), GABRA3(579), GRIK4(589), LEP(640), GRIA4(649), CCKAR(671), GRIN1(698), CHRM2(744), NOS1(768), TAC1(793), GNAL(800), MMP2(803), ADRA1A(840), GABBR1(842), GRIN2B(905), FGFR2(906), GRM7(914), NPY(940), CCKBR(972), HTR3A(989), CACNA1C(1024), GABRA6(1064), OPRM1(1092), ADORA2A(1100), GMIP(1109), TACR1(1115), GRIA3(1192), P2RX7(1260), CRHR1(1266), GSK3B(1321), HTR4(1360), CREB1(1414), ADRA1B(1419), HP(1559), GRIA1(1570), AKT1(1642), CNR1(1668), FGFR3(1676), AVPR1B(1703), CHRNA7(1708), AVPR1A(1775), CCK(1782), FGFR4(1862), GRIN2A(1903), HS6ST3(1962) |
| HTR2B | 5.87E-52 | HTR2A(1), HTR6(2), HTR5A(3), HTR2C(4), HTR1A(7), HTR7(8), HTR3A(9), HTR1B(10), SLC6A4(12), HTR3B(13), HTR4(14), ADRA2B(16), TPH2(17), ADRA2C(22), TPH1(24), ADRA1A(26), ADRA1B(35), ADRA2A(39), ADRB1(42), DRD1(48), ADORA2A(50), MAOA(62), ITPR1(63), AGTR1(83), TACR1(88), GRIA3(93), DRD5(96), FGFR2(102), DRD2(103), CCKBR(111), GRIA4(123), DRD3(152), CHRM2(160), GRIN2C(170), GRIN2D(194), CRHR2(201), TNF(206), GRIK3(211), GABBR1(226), GRIN1(229), GRIN2B(240), ESR1(241), IL6(244), AVPR1B(246), NR3C1(259), OPRD1(260), OPRK1(272), FGFR1(303), TH(309), CRHR1(332), AVPR1A(339), GRM7(349), CACNA1C(350), IL1B(357), ESR2(378), GRIA1(382), DDC(402), GABRA6(425), GABRA3(428), GNAS(473), GRIN2A(479), CNR1(541), P2RX7(574), TAC1(595), GRIK4(621), NOS1(634), FGFR3(666), LEPR(713), FGFR4(717), CCKAR(737), SLC6A2(764), ROS1(817), AKT1(826), GABRA5(854), GRIK1(859), OPRM1(894), NOS3(904), GRIA2(982), ADCY9(1005), AR(1015), P2RX4(1084), GNAL(1266), LRP1(1269), CHRNA7(1297), NGFR(1307), POMC(1323), NFKB1(1437), GRIK2(1589), PENK(1659), GPR50(1734), GRIN3A(1802), CREB1(1969)                                                                                                                             |
| HTR3A | 3.73E-49 | HTR3B(1), HTR2B(4), HTR5A(5), HTR6(6), HTR2A(7), HTR1A(8), HTR7(9), HTR2C(11), HTR1B(12), HTR4(16), SLC6A4(17), CHRNA7(24), GRIA3(25), GRIA4(29), CACNA1C(31), TPH2(34), GRIN2D(43), ITPR1(53), GRIN1(54), GRIA1(55), ADRA2B(62), GABBR1(67), CHRM2(71), GRIK3(72), TACR1(76), DRD1(78), GRIN2C(82), GABRA3(84), GABRA6(90), ADRA2C(92), GRIN2A(95), GRIA2(98), GABRA5(115), GRIN2B(121), ADRA1A(132), P2RX4(134), DRD2(139), CCKBR(141), GRM7(142), ADORA2A(145), GRIK1(148), GRIK5(152), TPH1(153), GRIK2(168), ADRB1(171), ADRA2A(173), GRIK4(179),                                                                                                                                                                                                                                                                                                                                                                                                                                                                                                                                                                                                                                                                                 |



|       |          |                                                                                                                                                                                                                                                                                                                                                                                                                                                                                                                                                                                                                                                                                                                                                                                                                                                                                                                                                                                                                                                                                                                                                                                                                                                                                                                                                                                                                                              |
|-------|----------|----------------------------------------------------------------------------------------------------------------------------------------------------------------------------------------------------------------------------------------------------------------------------------------------------------------------------------------------------------------------------------------------------------------------------------------------------------------------------------------------------------------------------------------------------------------------------------------------------------------------------------------------------------------------------------------------------------------------------------------------------------------------------------------------------------------------------------------------------------------------------------------------------------------------------------------------------------------------------------------------------------------------------------------------------------------------------------------------------------------------------------------------------------------------------------------------------------------------------------------------------------------------------------------------------------------------------------------------------------------------------------------------------------------------------------------------|
|       |          | DRD3(182), P2RX7(193), KCNC2(194), GRIN3A(197), CRHR1(198), CRHR2(202), ADRA1B(205), CHRFAM7A(212), CNR1(214), DRD5(219), OPRD1(224), AGTR1(227), MAOA(230), OPRK1(236), TAC1(243), AVPR1B(269), CCKAR(281), ESR1(285), NR3C1(287), OPRM1(310), AVPR1A(313), FGFR2(348), SLC6A1(385), TH(399), ESR2(419), GNAS(490), IL6(500), PENK(588), GAD1(639), TNF(644), AR(652), POMC(658), LEPR(668), NGFR(671), FGFR1(718), SLC6A2(762), ANK3(772), CCK(805), IL1B(814), FGFR3(858), NTRK2(888), FGFR4(1029), PSMB4(1043), LRP1(1044), ADCY9(1139), BDNF(1144), NTRK3(1170), NPY(1219), DDC(1239), PDE1A(1269), GNAL(1291), DRD4(1358), ROS1(1369), CREB1(1399), NOS1(1431), AKT1(1451), ABCB1(1504), SLC6A3(1796), CRHBP(1828), LEP(1850), M6PR(1891), APOE(1937), NFKB1(1950)                                                                                                                                                                                                                                                                                                                                                                                                                                                                                                                                                                                                                                                                     |
| CHRM2 | 4.32E-47 | ADRA2B(9), HTR3A(14), ADRB1(18), ADRA2C(21), DRD1(26), CHRNA7(27), ADRA2A(29), HTR1A(35), ADRA1A(36), ADRA1B(38), HTR1B(41), DRD2(45), ADORA2A(48), TACR1(49), HTR2A(54), GRM7(57), ITPR1(58), GABBR1(61), AGTR1(62), DRD5(68), DRD3(74), GRIA3(80), HTR2C(84), GRIA1(87), GRIN2C(92), HTR2B(93), IL6(97), GRIA4(99), GRIN1(108), HTR5A(114), CACNA1C(118), CCKBR(119), ESR1(129), GRIK3(131), CNR1(140), GABRA3(141), HTR6(143), CHRFAM7A(152), GRIN2D(154), TNF(162), HTR7(163), OPRD1(167), GRIN2A(169), CRHR1(172), TAC1(173), GABRA6(179), HTR4(180), APOE(183), P2RX7(188), GRIN2B(190), CRHR2(192), AVPR1B(195), OPRK1(199), NOS3(209), CCKAR(216), OPRM1(219), NR3C1(220), LEPR(221), GRIA2(229), ESR2(230), AVPR1A(231), TH(240), IL1B(243), GNAS(265), P2RX4(272), GABRA5(305), NOS1(310), GRIK1(314), FGFR2(370), GRIK5(381), POMC(415), HTR3B(419), GRIK2(433), NGFR(436), PENK(447), AR(451), ADCY9(470), AKT1(473), GRIN3A(502), CREB1(534), LEP(544), NPY(561), GRIK4(565), LRP1(571), SLC6A2(577), ABCB1(594), SLC6A4(605), BDNF(686), FGFR1(727), MMP2(737), SERPINA3(811), DRD4(817), GAD1(852), NTRK2(882), FGFR3(885), NFKB1(915), FGFR4(949), SLC6A1(954), CCK(994), SLC6A3(1010), GNAL(1059), GSK3B(1061), CTLA4(1152), GNB3(1166), PDE1A(1269), ROS1(1284), KCNC2(1293), NTRK3(1316), GPR50(1411), CCL2(1418), ACE(1538), M6PR(1581), MAOA(1639), PLA2G4A(1689), STAT3(1869), PLA2G2A(1871), ANK3(1899), DTNBP1(1947) |
| TAC1  | 1.72E-44 | TACR1(1), IL6(13), TNF(19), IL1B(31), ABCB1(38), PENK(44), TH(53), ADRA2B(62), DRD1(66), AGTR1(67), HTR1A(74), HTR3A(78), HTR2A(80), NGFR(84), NPY(104), NOS1(108), ADORA2A(109), DRD2(110), POMC(118), HTR1B(123), DRD3(151), NOS3(152), LEPR(161), ESR1(172), GABBR1(189), ADRB1(194), ADRA2C(195), GRIA3(214), CRHR1(242), NFKB1(255), HTR2C(273), LEP(275), ADRA2A(284), ADRA1A(288), BDNF(298), OPRM1(311), GRIN1(317), CHRM2(322), CCKBR(332), APOE(335), ESR2(337), ADRA1B(342), GRIA1(348), CRHR2(349), MMP2(359), ITPR1(361), NR3C1(374), GRM7(375), CCL2(376), GNAS(378), GAD1(381), AKT1(387), GRIA4(403), GRIN2C(428), CREB1(435), CNR1(440), FGFR2(451), P2RX7(457), NTRK3(463), CACNA1C(464), HTR2B(474), OPRD1(501), GABRA6(541), GRIK3(554), GRIN2D(557), SLC6A4(559), CCKAR(598), OPRK1(604), HTR7(606), SERPINA3(625), GRIN2A(635), HTR5A(654), AVPR1A(739), GRIN2B(762), NTRK2(789), FGFR1(923), SLC6A2(927), DRD5(930), CCK(948), GABRA3(965), CTLA4(1001), AR(1005), HTR6(1026), FGFR4(1120), GSK3B(1144), HTR4(1178), ACE(1199), GRIA2(1218), STAT3(1263), ADCY9(1266), CHRNA7(1275), PLA2G2A(1282), P2RX4(1306), AVPR1B(1326), SLC6A3(1345), FGFR3(1435), GRIN3A(1513), CCND2(1520), GRIK1(1526), LRP1(1560), GABRA5(1697), PLA2G4A(1767), PRKCH(1779),                                                                                                                                                               |

|        |          |                                                                                                                                                                                                                                                                                                                                                                                                                                                                                                                                                                                                                                                                                                                                                                                                                                                                                                                                                                                                                                                                                                                                                                                                                                                                                                                                                             |
|--------|----------|-------------------------------------------------------------------------------------------------------------------------------------------------------------------------------------------------------------------------------------------------------------------------------------------------------------------------------------------------------------------------------------------------------------------------------------------------------------------------------------------------------------------------------------------------------------------------------------------------------------------------------------------------------------------------------------------------------------------------------------------------------------------------------------------------------------------------------------------------------------------------------------------------------------------------------------------------------------------------------------------------------------------------------------------------------------------------------------------------------------------------------------------------------------------------------------------------------------------------------------------------------------------------------------------------------------------------------------------------------------|
|        |          | GRIK4(1946), SLC6A1(1987)                                                                                                                                                                                                                                                                                                                                                                                                                                                                                                                                                                                                                                                                                                                                                                                                                                                                                                                                                                                                                                                                                                                                                                                                                                                                                                                                   |
| AGTR1  | 7.27E-42 | ACE(4), ADRA2B(19), ADRA1A(23), IL6(26), NOS3(34), TNF(38), ADRB1(39), HTR1A(40), DRD1(42), ADRA1B(54), IL1B(74), LEPR(83), HTR2A(84), AVPR1A(85), ESR1(86), GNB3(87), TACR1(100), DRD3(102), DRD2(108), ADRA2A(109), APOE(111), ADORA2A(123), HTR1B(130), ITPR1(133), ADRA2C(145), HTR2B(158), CRHR1(173), NR3C1(180), MMP2(189), TAC1(196), NOS1(200), HTR3A(201), AKT1(203), HTR2C(206), HTR6(213), CCKBR(214), CHRM2(224), GNAS(226), ESR2(230), CACNA1C(231), LEP(245), CCL2(258), TH(271), CRHR2(319), AVPR1B(327), FGFR2(342), ABCB1(345), GABBR1(351), NFKB1(361), DRD5(363), CCKAR(365), POMC(399), HTR7(410), GRIA3(435), GRIA4(440), AR(468), SLC6A4(492), OPRD1(500), P2RX7(505), CTLA4(509), HTR5A(526), GRM7(529), GRIN1(534), GRIK3(540), SERPINA3(551), FGFR1(567), CNR1(577), GABRA6(623), NPY(631), LRP1(665), GRIA1(670), HTR4(743), OPRM1(766), MTHFR(792), GRIN2C(808), SLC6A2(809), GRIN2A(810), PENK(813), OPRK1(816), GRIN2D(818), DUSP6(823), GABRA3(829), FGFR4(847), FGFR3(880), CREB1(892), DRD4(899), GRIN2B(960), P2RX4(1035), STAT3(1079), NGFR(1094), CYP2C9(1095), ADCY9(1104), ROS1(1229), PLA2G2A(1251), GSK3B(1258), PLA2G4A(1287), GPR50(1410), M6PR(1580), GRIA2(1594), BDNF(1601), PDE1A(1672), CHRNA7(1695), CCND2(1746), PDE5A(1752), MAOA(1753), GABRA5(1772), SLC6A3(1823), PRKCH(1939), CCK(1979), GRIN3A(1992) |
| ADRA1B | 9.34E-42 | ADRA1A(2), ADRB1(3), ADRA2C(4), ADRA2B(5), ADRA2A(6), AR(9), HTR1B(13), HTR1A(20), DRD1(31), TNF(36), AGTR1(37), GNAS(41), VGLL4(42), CACNA1C(47), ADORA2A(57), HTR2B(58), ESR1(67), AVPR1B(70), DRD2(73), CHRM2(84), HTR2C(88), IL6(91), HTR2A(96), IL1B(110), TH(117), DRD3(121), SLC6A2(128), DRD5(129), HTR3A(141), ITPR1(147), GABRA3(151), HTR5A(154), GABRA6(155), TACR1(160), AVPR1A(166), ESR2(177), CCKBR(182), HTR7(191), GRM7(200), HTR6(207), CRHR1(209), GRIA4(211), GABBR1(220), CCKAR(228), NR3C1(251), CRHR2(266), GRIA3(267), ADCY9(282), OPRD1(301), SERPINA3(313), GRIA1(316), HTR4(343), AKT1(345), GABRA5(380), LEPR(386), GRIN1(395), OPRK1(402), GRIN2C(445), OPRM1(452), FGFR2(453), GNAL(472), POMC(473), CREB1(499), GRIN2D(512), TAC1(533), NFKB1(554), GRIK3(584), NOS1(588), NOS3(622), CHRNA7(633), GRIN2A(654), PENK(667), CNR1(672), LEP(715), FGFR1(757), APOE(769), LRP1(796), STAT3(886), PDE1A(933), ABCB1(939), GRIN2B(975), GRIA2(1024), P2RX7(1053), NPY(1056), GSK3B(1080), SLC6A4(1094), NGFR(1164), MMP2(1189), P2RX4(1233), FGFR4(1289), ROS1(1402), SLC6A3(1427), FGFR3(1471), GRIN3A(1522), KCNC2(1593), PRKCH(1602), GRIK4(1644), GAD1(1740), PSMD9(1754), GRIK1(1855), CCND2(1857), GNB3(1940), DRD4(1960), GSK3A(1991), ANK3(1995)                                                                         |
| CCK    | 4.04E-38 | CCKAR(1), CCKBR(2), IL6(25), PENK(26), HTR3A(32), ADRA2B(37), NPY(38), DRD1(43), TNF(49), TH(50), POMC(53), LEPR(55), DRD2(63), LEP(69), TACR1(71), HTR1A(76), TAC1(91), CRHR1(100), DRD3(101), IL1B(106), HTR2A(108), ADRB1(129), ADRA2C(138), AGTR1(173), HTR2C(185), ESR1(197), GABBR1(204), ADRA2A(206), ITPR1(218), HTR1B(225), ADRA1B(241), CRHR2(247), GRIA3(251), ADRA1A(259), OPRK1(279), GNAS(282), OPRM1(284), CACNA1C(300), GRIA4(306), GAD1(318), NR3C1(323), ADORA2A(338), GRIN1(397), GRM7(403), CHRM2(404), FGFR2(406), DRD5(410), ABCB1(416), OPRD1(419), APOE(426), AR(455), HTR5A(460), SERPINA3(545), GRIA1(558), GRIK3(562), NFKB1(564), GABRA3(582), HTR2B(605), NOS1(608), HTR6(629), MMP2(702), SLC6A4(708), ESR2(754), AKT1(757), CNR1(758), GABRA6(776), GRIN2C(782), BDNF(783), CREB1(808), AVPR1A(842), HTR7(927),                                                                                                                                                                                                                                                                                                                                                                                                                                                                                                              |

|      |          |                                                                                                                                                                                                                                                                                                                                                                                                                                                                                                                                                                                                                                                                                                                                                                                                                                                                                                                                                                                                                                                                                                                                                                                                                                                         |
|------|----------|---------------------------------------------------------------------------------------------------------------------------------------------------------------------------------------------------------------------------------------------------------------------------------------------------------------------------------------------------------------------------------------------------------------------------------------------------------------------------------------------------------------------------------------------------------------------------------------------------------------------------------------------------------------------------------------------------------------------------------------------------------------------------------------------------------------------------------------------------------------------------------------------------------------------------------------------------------------------------------------------------------------------------------------------------------------------------------------------------------------------------------------------------------------------------------------------------------------------------------------------------------|
|      |          | AVPR1B(978), HTR4(1040), NOS3(1058), GRIN2D(1079), SLC6A2(1160), FGFR1(1244), ADCY9(1250), GRIN2A(1267), GRIN2B(1309), SLC6A3(1338), GABRA5(1382), PSMD9(1434), P2RX7(1439), NGFR(1459), FGFR4(1507), PSMB4(1519), CCL2(1538), SLC6A1(1549), ROS1(1550), GSK3B(1705), FGFR3(1801), PLA2G2A(1836), GNAL(1871), CTLA4(1913), GRIA2(1960), GRIN3A(1979), GRIK4(1993)                                                                                                                                                                                                                                                                                                                                                                                                                                                                                                                                                                                                                                                                                                                                                                                                                                                                                       |
| ACE  | 6.16E-38 | AGTR1(2), GNB3(10), MTHFR(14), NOS3(18), ADRA2B(20), IL6(25), APOE(30), TNF(31), IL1B(46), SLC6A4(49), HTR2A(52), SERPINA3(80), ABCB1(82), CYP2C9(90), CTLA4(91), LEPR(100), ADRB1(134), COMT(151), DRD3(154), CCL2(160), ESR1(176), LEP(179), DRD2(182), MMP2(197), DRD4(211), MAOA(255), GNAS(283), TAC1(292), DTNBP1(295), TPH2(297), DRD1(304), NOS1(310), TH(324), DAOA(330), HTR6(363), ADRA2A(371), ADRA1A(386), HTR1A(405), TPH1(426), POMC(445), NPY(494), ADRA2C(502), AR(519), GPR50(523), SLC6A2(527), TACR1(536), ESR2(557), GRIK3(561), NR3C1(569), HTR2C(578), SLC6A3(611), CCKAR(655), HTR1B(710), ADRA1B(730), HP(792), PLA2G2A(804), CHRM2(814), CACNA1C(858), WFS1(917), AKT1(971), NFKB1(1034), PENK(1112), AVPR1A(1139), CCKBR(1150), ADORA2A(1229), CRHR1(1234), FGFR2(1239), MAOB(1251), ADCY9(1356), BDNF(1359), ITPR1(1400), GRIA4(1424), FZD3(1550), SYN3(1551), CCND2(1590), HTR3A(1630), HTR2B(1636), GRIN1(1658), GABRA6(1676), DRD5(1682), CCK(1707), GAD1(1709), FGFR3(1736), ACSL4(1769), GSK3B(1771), GRIN2B(1816), GABBR1(1826), GABRA3(1851), P2RX7(1874), FGFR4(1954)                                                                                                                                               |
| GNB3 | 2.12E-37 | ACE(7), MTHFR(11), ADRA2B(18), ADRB1(21), GNAS(28), HTR2A(29), AGTR1(34), SLC6A4(42), CTLA4(43), IL6(44), TNF(53), NOS3(55), IL1B(67), APOE(73), SERPINA3(84), ABCB1(91), GNAL(95), CYP2C9(103), COMT(123), HTR6(124), GPR50(125), DRD4(127), GABRA6(129), ADRA2A(148), CCL2(153), LEPR(162), ESR1(164), LEP(165), GRIK3(172), DTNBP1(194), DAOA(198), DRD2(210), GABRA3(222), DRD3(223), HTR1A(225), ADRA1A(244), ADRA2C(256), MAOA(257), HTR2C(283), CACNA1C(284), TPH2(286), ADCY9(369), PSMB4(374), ESR2(411), DRD1(443), ADRA1B(468), POMC(472), SLC6A2(487), GABRA5(493), TPH1(498), CCKAR(531), GRIA4(570), WFS1(574), AR(610), SLC6A3(624), NR3C1(630), MMP2(633), GRIA3(650), GABBR1(696), HTR1B(711), HP(715), TAC1(725), NPY(757), FZD3(774), GRIN2B(775), TH(855), HTR3A(875), CHRM2(883), PSMD9(927), HTR5A(989), NOS1(1109), GRIN1(1148), GRIN2A(1171), CCKBR(1189), AVPR1A(1202), TACR1(1206), GRIN2D(1227), AKT1(1239), CD3E(1247), NFKB1(1371), DRD5(1383), GMIP(1401), HTR7(1432), HTR2B(1468), SYN3(1484), FGFR2(1553), ANK3(1556), CHRNA7(1576), P2RX7(1583), ADORA2A(1625), GYPA(1658), HTR4(1665), GRIN2C(1712), BDNF(1723), GSK3B(1774), GRIA1(1799), MAOB(1806), PENK(1823), HTR3B(1864), GRIK4(1883), FGFR3(1983), ITPR1(1995) |
| TPH1 | 2.13E-37 | TPH2(1), SLC6A4(3), TH(4), HTR2A(5), HTR6(6), HTR1A(8), HTR2B(10), HTR2C(12), HTR1B(16), HTR5A(20), HTR3A(27), HTR7(37), MAOA(42), DTNBP1(60), HTR4(61), HTR3B(72), DAOA(80), SLC6A2(82), ADRA2B(86), DRD4(98), DDC(99), IL6(124), TNF(144), ADRA2C(164), SLC6A3(171), IL1B(185), GNB3(192), DRD3(202), ESR1(209), CYP2C9(234), ACE(248), DRD2(257), ABCB1(262), GNAS(279), COMT(285), GRIK3(301), FZD3(313), SERPINA3(327), ADRB1(348), GPR50(359), GAD1(369), AGTR1(378), ADRA2A(402), APOE(427), WFS1(476), CTLA4(493), POMC(512), ADRA1A(527), PENK(532), SLC25A21(543), NR3C1(598), TAC1(631), MTHFR(648), ESR2(654), NOS3(710), DRD1(729), FGFR2(771), ADCY9(780), CACNA1C(788), BDNF(819), GRIA4(845), TACR1(964), MAOB(990), LEPR(1007), DRD5(1022),                                                                                                                                                                                                                                                                                                                                                                                                                                                                                            |

|        |          |                                                                                                                                                                                                                                                                                                                                                                                                                                                                                                                                                                                                                                                                                                                                                                                                                                                                                                                                                                                                                                                                                                                                                                                                                                                                                                                               |
|--------|----------|-------------------------------------------------------------------------------------------------------------------------------------------------------------------------------------------------------------------------------------------------------------------------------------------------------------------------------------------------------------------------------------------------------------------------------------------------------------------------------------------------------------------------------------------------------------------------------------------------------------------------------------------------------------------------------------------------------------------------------------------------------------------------------------------------------------------------------------------------------------------------------------------------------------------------------------------------------------------------------------------------------------------------------------------------------------------------------------------------------------------------------------------------------------------------------------------------------------------------------------------------------------------------------------------------------------------------------|
|        |          | GABRA3(1153), GRIA3(1161), CRHR1(1274), CRHR2(1319), ADRA1B(1386), CREB1(1418), AR(1484), ITPR1(1489), GABRA6(1543), PSMB4(1549), FGFR4(1570), NOS1(1620), GABBR1(1625), PDE1A(1706), PSMD9(1898), CCL2(1963)                                                                                                                                                                                                                                                                                                                                                                                                                                                                                                                                                                                                                                                                                                                                                                                                                                                                                                                                                                                                                                                                                                                 |
| SLC6A2 | 7.87E-37 | SLC6A3(1), SLC6A4(2), SLC6A1(11), TH(19), ADRA2A(39), ADRA2B(40), ADRA2C(42), DRD2(61), DRD1(66), DRD3(71), ADRA1B(81), HTR1A(87), HTR2A(88), MAOA(93), ADRB1(96), HTR1B(97), ADRA1A(112), DRD5(123), TPH2(136), HTR2C(142), ABCB1(143), IL6(148), DRD4(152), TNF(185), AGTR1(221), HTR3A(240), HTR2B(276), HTR6(286), TPH1(290), GRIK3(294), ADORA2A(307), GRIA3(313), IL1B(319), PENK(332), TACR1(337), ESR1(342), GNAS(346), CACNA1C(350), HTR5A(367), APOE(376), TAC1(382), GRIA4(390), BDNF(417), LEPR(429), GRIA1(438), DDC(453), DTNBP1(460), GRIN1(473), NOS3(480), POMC(481), NR3C1(491), GABRA6(510), LEP(515), GAD1(521), CREB1(526), GABBR1(534), GRM7(542), CHRM2(544), NOS1(607), CRHR1(609), HTR7(610), GNB3(629), GABRA3(643), OPRM1(648), CNR1(684), FGFR2(714), NPY(760), CCKBR(770), ESR2(771), ITPR1(798), GRIN2D(812), HTR4(816), AKT1(831), AR(847), OPRK1(885), SERPINA3(897), ADCY9(916), GRIN2A(920), MAOB(922), CRHR2(929), AVPR1B(950), GRIN2B(955), COMT(1007), ACE(1047), OPRD1(1078), GRIN2C(1086), CCKAR(1096), ROS1(1100), CTLA4(1139), NGFR(1147), MMP2(1159), GSK3B(1193), AVPR1A(1303), CYP2C9(1375), GNAL(1435), NFKB1(1452), GABRA5(1486), PRKCH(1534), MYO5B(1630), WFS1(1659), P2RX7(1720), GRIA2(1754), FGFR3(1764), GRIK4(1801), GRIN3A(1803), CHRNA7(1826), CCL2(1841), NTRK3(1884) |
| HTR3B  | 8.00E-37 | HTR3A(1), HTR2B(4), HTR5A(5), HTR6(7), HTR2A(8), HTR1A(9), HTR7(10), HTR2C(12), HTR1B(13), SLC6A4(15), HTR4(17), CACNA1C(24), TPH2(32), GRIN2D(34), GRIA3(35), GRIA4(44), GRIK5(55), GRIN2C(62), GABRA6(71), GRIN2A(82), GABRA3(87), GRIN1(94), GRIK3(98), GRIA1(99), ITPR1(104), GRIN2B(105), GRIN3A(108), GRIA2(116), GABRA5(123), GRIK1(144), CHRNA7(153), GABBR1(155), TPH1(169), DRD1(171), GRIK2(172), ADRA2B(183), GRIK4(190), P2RX4(195), KCNC2(206), ADRA1A(228), CHRM2(230), ADRA2C(259), TACR1(262), ADORA2A(269), DRD2(272), MAOA(307), ADRB1(317), P2RX7(324), GRM7(340), PSMB4(354), CCKBR(359), DRD3(375), DRD5(377), ESR1(381), GNAS(410), ADRA1B(424), ESR2(432), ADRA2A(449), OPRD1(461), GNAL(484), AGTR1(487), OPRK1(546), FGFR2(551), TH(559), TAC1(601), CNR1(634), NR3C1(649), CRHR1(730), CRHR2(745), AVPR1A(771), AVPR1B(794), CCKAR(800), NGFR(845), OPRM1(847), GNB3(966), IL6(1036), TNF(1095), NTRK3(1127), DDC(1159), SLC6A2(1161), LEPR(1225), ANK3(1227), FGFR3(1283), AR(1308), NTRK2(1348), FGFR1(1350), FGFR4(1369), CHRFA7A(1386), PDE1A(1435), IL1B(1438), GAD1(1543), SLC6A1(1591), LRP1(1618), POMC(1756), BDNF(1809), PENK(1818), NFKB1(1964), ABCB1(1967)                                                                                                                            |
| ADRA1A | 3.41E-36 | ADRA1B(2), ADRA2C(3), ADRA2B(4), ADRB1(5), ADRA2A(6), HTR1A(9), AR(11), CACNA1C(22), AGTR1(27), TNF(32), GNAS(36), HTR2B(39), VGLL4(42), DRD1(44), HTR1B(53), ESR1(74), ITPR1(75), AVPR1A(84), ADORA2A(94), HTR2A(95), ADCY9(107), GRM7(111), HTR3A(113), HTR7(114), HTR5A(117), CHRM2(121), HTR4(138), HTR2C(143), DRD2(145), IL6(146), AKT1(149), ESR2(159), DRD5(164), HTR6(173), AVPR1B(175), GRIA4(179), PDE1A(196), IL1B(199), GRIA3(233), TACR1(250), GABRA6(261), GABBR1(265), SERPINA3(266), DRD3(279), NR3C1(285), TH(296), CCKBR(323), GABRA3(324), CCKAR(336), SLC6A2(349), CRHR1(369), OPRD1(403), GRIK3(413), CREB1(417), CRHR2(449), FGFR2(464), GRIN1(476), GRIA1(490), OPRK1(518), NFKB1(519), GRIN2D(552), GRIN2C(575), GNAL(619), LEPR(627),                                                                                                                                                                                                                                                                                                                                                                                                                                                                                                                                                               |

|       |          |                                                                                                                                                                                                                                                                                                                                                                                                                                                                                                                                                                                                                                                                                                                                                                                                                                                                                                                                                                                                                                                                                                                                                                                                                                                                                                                        |
|-------|----------|------------------------------------------------------------------------------------------------------------------------------------------------------------------------------------------------------------------------------------------------------------------------------------------------------------------------------------------------------------------------------------------------------------------------------------------------------------------------------------------------------------------------------------------------------------------------------------------------------------------------------------------------------------------------------------------------------------------------------------------------------------------------------------------------------------------------------------------------------------------------------------------------------------------------------------------------------------------------------------------------------------------------------------------------------------------------------------------------------------------------------------------------------------------------------------------------------------------------------------------------------------------------------------------------------------------------|
|       |          | POMC(644), PRKCH(653), TAC1(711), NOS3(751), P2RX4(771), CHRNA7(775), GABRA5(829), FGFR1(844), NOS1(886), LRP1(911), P2RX7(926), GSK3B(958), GRIN2B(961), GRIN2A(964), OPRM1(974), CAMKK2(1038), GRIN3A(1039), CNR1(1082), MMP2(1107), SLC6A4(1109), PDE2A(1122), GRIA2(1177), LEP(1218), ROS1(1312), FGFR4(1317), PENK(1483), GNB3(1500), ABCB1(1505), PLA2G4A(1515), ANK3(1637), CCL2(1663), GSK3A(1685), STAT3(1692), PSMD9(1725), FGFR3(1743), GRIK4(1764), APOE(1785), PDE11A(1853), NPY(1955), GRIK1(1987)                                                                                                                                                                                                                                                                                                                                                                                                                                                                                                                                                                                                                                                                                                                                                                                                       |
| ADRB1 | 4.65E-35 | ADRA1B(3), ADRA2B(4), ADRA1A(5), ADRA2C(6), ADRA2A(8), AR(11), ADCY9(17), GNAS(51), DRD1(57), AGTR1(60), ADORA2A(63), HTR1A(67), VGLL4(75), CHRM2(82), GNB3(85), TNF(86), IL6(88), HTR2A(89), CACNA1C(94), ESR2(96), DRD2(97), ESR1(100), IL1B(101), HTR2C(124), HTR2B(131), CCKAR(156), DRD3(159), TACR1(166), HTR6(168), AKT1(171), HTR3A(176), DRD5(187), HTR1B(189), NR3C1(194), CCKBR(212), ITPR1(251), GRM7(265), SLC6A2(275), GABRA3(284), HTR4(286), CREB1(289), HTR5A(308), LEPR(309), GRIA4(313), CRHR1(320), POMC(332), HTR7(334), TH(338), OPRD1(343), GABRA6(366), NOS3(368), GABBR1(390), GRIA3(420), AVPR1A(421), GSK3B(440), CRHR2(445), OPRK1(447), LEP(461), GRIK3(508), TAC1(529), GRIN1(532), APOE(543), GRIA1(569), LRP1(592), FGFR2(606), NFKB1(612), P2RX7(617), OPRM1(639), AVPR1B(640), CNR1(648), MMP2(682), GRIN2C(702), GPR50(721), SLC6A4(737), ABCB1(740), GNAL(755), SERPINA3(771), CHRNA7(855), P2RX4(860), NOS1(862), FGFR1(864), GRIN2A(869), GRIN2B(870), CCL2(882), PSMB4(888), CTLA4(985), GRIN2D(1029), GSK3A(1031), ACE(1090), DRD4(1095), PSMD9(1159), NPY(1160), GABRA5(1220), PDE2A(1231), CAMKK2(1318), GRIA2(1363), ROS1(1369), CYP2C9(1390), PENK(1391), STAT3(1398), FGFR3(1415), ANK3(1585), PRKCH(1629), NGFR(1702), FGFR4(1758), PDE1A(1824), GRIK2(1874), CD3E(1931) |
| MAOB  | 6.58E-34 | MAOA(1), DRD2(44), SLC6A4(70), DRD3(72), COMT(74), TH(77), DRD1(78), GABBR1(80), SLC6A3(83), HTR2A(91), HTR1A(95), SLC6A2(112), DRD4(115), HTR1B(118), IL6(125), DRD5(129), TNF(136), ESR1(138), APOE(152), ADRA2B(169), HTR6(191), CCKBR(202), DDC(211), TPH2(220), HTR3A(237), IL1B(244), TPH1(245), ADRA2C(253), ABCB1(261), HTR2C(263), SERPINA3(264), ESR2(268), NFKB1(304), ACE(317), NOS3(318), GNAS(322), AGTR1(323), GNB3(356), HTR2B(360), HTR5A(362), PENK(375), ADRA2A(377), ADRB1(473), NR3C1(490), LEPR(508), ADRA1A(544), GAD1(588), NOS1(625), AKT1(626), TAC1(633), ADRA1B(664), CYP2C9(673), TACR1(687), POMC(742), MMP2(745), MTHFR(765), GRIA3(809), GRIK3(812), BDNF(826), DTNBP1(851), CCKAR(855), GRIA4(868), LEP(883), CTLA4(888), HTR7(904), AR(941), GABRA3(982), ADORA2A(994), HTR4(1039), FGFR2(1073), CRHR1(1079), ITPR1(1110), CREB1(1125), CCND2(1180), GNAL(1280), GSK3B(1307), PSMB4(1350), CHRM2(1359), CACNA1C(1373), CCL2(1402), DAOA(1483), GRIN1(1540), NPY(1573), CRHR2(1576), GRIA1(1627), PLA2G2A(1630), CCK(1654), GYPA(1658), ADCY9(1662), CNR1(1791), GRM7(1829), ACSL4(1837), GABRA6(1941), PSMD9(1954)                                                                                                                                                                   |
| POMC  | 1.93E-33 | AVPR1B(12), CRHR1(15), PENK(16), LEP(17), IL6(28), CRHR2(29), LEPR(30), TNF(31), NPY(33), CRHBP(37), IL1B(55), OPRM1(81), ESR1(83), GNAS(94), NR3C1(98), TH(100), ADRA2B(127), ADRB1(143), DRD2(147), ESR2(148), OPRD1(149), TAC1(156), OPRK1(157), ADRA2A(238), AGTR1(264), DRD1(279), TACR1(288), HTR1A(291), NFKB1(304), CCKBR(312), HTR2C(323), ADRA1A(331), ADRA2C(373), ADRA1B(389), ADORA2A(438), APOE(442), AKT1(451), FGFR2(464), HTR2A(467), CREB1(471), SERPINA3(484), HTR1B(495), NOS1(504), DRD3(520), GABRA6(545), HTR3A(560),                                                                                                                                                                                                                                                                                                                                                                                                                                                                                                                                                                                                                                                                                                                                                                           |

|       |          |                                                                                                                                                                                                                                                                                                                                                                                                                                                                                                                                                                                                                                                                                                                                                                                                                                                                                                                                                                                                                                                                                                                                                                                                                                                                                 |
|-------|----------|---------------------------------------------------------------------------------------------------------------------------------------------------------------------------------------------------------------------------------------------------------------------------------------------------------------------------------------------------------------------------------------------------------------------------------------------------------------------------------------------------------------------------------------------------------------------------------------------------------------------------------------------------------------------------------------------------------------------------------------------------------------------------------------------------------------------------------------------------------------------------------------------------------------------------------------------------------------------------------------------------------------------------------------------------------------------------------------------------------------------------------------------------------------------------------------------------------------------------------------------------------------------------------|
|       |          | <p>ABCB1(667), MMP2(692), CACNA1C(739), NOS3(793), ITPR1(812), AR(826), GSK3B(905), CCKAR(927), GAD1(940), AVPR1A(942), CCK(945), STAT3(984), BDNF(1071), FGFR4(1075), GABBR1(1083), GRIA3(1085), CCL2(1117), GABRA3(1144), ADCY9(1148), SLC6A4(1224), HTR2B(1234), CHRM2(1277), PSMD9(1299), GRIN1(1307), FGFR1(1324), CNR1(1419), NGFR(1463), CCND2(1468), SLC6A2(1551), GRIA4(1553), ROS1(1644), FGFR3(1645), PSMB4(1661), PRKCH(1748), CTLA4(1762), GSK3A(1779), DRD5(1824), HTR5A(1836), HTR6(1856), GNB3(1868), LRP1(1883), CD3E(1896), GRIA1(1913)</p>                                                                                                                                                                                                                                                                                                                                                                                                                                                                                                                                                                                                                                                                                                                   |
| OPRK1 | 1.99E-33 | <p>OPRD1(1), OPRM1(2), PENK(10), DRD1(21), DRD2(36), NFKB1(40), ADRA2A(41), ADRA2B(50), DRD3(51), ADORA2A(52), HTR3A(53), CCKBR(59), POMC(62), TACR1(65), ADRB1(68), GRIA4(70), HTR1A(72), CNR1(79), HTR5A(84), ADRA1A(88), HTR2B(98), GRIN1(99), ADRA2C(104), ADRA1B(105), HTR2A(106), GRIA3(112), HTR1B(123), GABRA6(139), HTR2C(141), DRD5(143), GABBR1(160), NR3C1(167), HTR7(168), GRIN2C(171), HTR4(173), GRIK3(177), CRHR1(184), CHRM2(186), AGTR1(199), HTR6(203), ITPR1(205), GRIN2D(206), GRIA1(214), ESR1(218), GRM7(224), GRIN2A(234), CREB1(241), TAC1(255), CRHR2(271), AVPR1B(294), IL6(295), TNF(299), FGFR2(311), TH(324), GABRA3(367), GRIN2B(370), GNAS(387), AVPR1A(394), CCKAR(413), ESR2(426), IL1B(441), P2RX7(480), GRIN3A(547), GRIK4(569), GRIA2(589), ADCY9(592), FGFR1(593), GABRA5(604), AR(644), GRIK1(692), CD3E(705), CACNA1C(768), NGFR(778), CCK(788), LEPR(813), AKT1(818), PRKCH(829), SLC6A2(884), FGFR4(909), P2RX4(916), GAD1(945), GRIK5(961), GRIK2(963), GNAL(973), LRP1(1040), NOS1(1156), FGFR3(1192), CHRNA7(1290), NTRK2(1310), ABCB1(1409), PDE1A(1417), DRD4(1424), HTR3B(1432), ROS1(1447), GSK3B(1558), NTRK3(1601), BDNF(1684), GPR50(1733), NPY(1773), SLC6A4(1774), SLC6A3(1809), CCL2(1860), FKBP5(1978), PSMB4(1986)</p> |
| MTHFR | 3.17E-31 | <p>GNB3(11), ACE(15), APOE(39), IL6(40), NOS3(51), HTR2A(63), SLC6A4(65), CTLA4(67), TNF(72), CYP2C9(73), IL1B(78), SERPINA3(89), ABCB1(92), ADRA2B(93), AGTR1(97), COMT(108), DTNBP1(117), DAOA(128), ESR1(170), DRD4(172), CCL2(175), LEPR(219), LEP(223), MAOA(230), ADRB1(242), TPH2(250), GNAS(279), DRD2(296), GPR50(298), HTR6(312), DRD3(315), TPH1(342), MMP2(353), WFS1(379), AR(383), SLC6A3(390), HP(426), GRIK3(440), HTR1A(476), HTR2C(516), ADRA2C(527), ESR2(530), NOS1(543), TAC1(557), SLC6A2(574), HTR1B(581), NPY(607), CCKAR(632), POMC(660), ADRA2A(672), NR3C1(691), FZD3(796), DRD1(811), TH(834), MAOB(843), TACR1(976), FGFR3(1036), ADRA1A(1039), SYN3(1055), CHRM2(1064), CCKBR(1087), FGFR2(1095), BDNF(1118), CACNA1C(1253), GMIP(1285), NFKB1(1315), PLA2G2A(1387), PENK(1404), ADCY9(1438), FGFR4(1472), AKT1(1475), CRHR1(1531), CCK(1539), ADORA2A(1560), HTR7(1563), GAD1(1581), HTR5A(1589), GABRA6(1591), GYPA(1647), HTR3A(1713), P2RX7(1726), GRIA4(1771), GABBR1(1775), GABRA3(1799), TBX21(1898), GSK3B(1984), ITPR1(1999)</p>                                                                                                                                                                                                         |
| LEP   | 4.51E-31 | <p>LEPR(1), NPY(15), IL6(20), POMC(29), TNF(32), IL1B(79), ADRA2B(88), APOE(92), HTR2C(133), AGTR1(138), ESR1(144), NOS3(166), ADRB1(168), STAT3(169), AKT1(186), ADRA2A(193), NR3C1(228), TAC1(232), CCKAR(235), TH(243), ABCB1(251), CRHR1(262), GNAS(267), HTR1A(271), TACR1(283), NOS1(294), CCKBR(299), DRD2(301), CRHR2(317), GNB3(321), MMP2(324), ESR2(325), DRD1(328), ADRA1B(359), HTR2A(364), DRD3(367), ADRA1A(380), CCL2(393), HTR1B(401), NFKB1(403), ADORA2A(416), PENK(418), ADRA2C(429), ACE(482), AR(535), SERPINA3(538), CCK(540), CNR1(589), CREB1(604), CNTF(627), GSK3B(634),</p>                                                                                                                                                                                                                                                                                                                                                                                                                                                                                                                                                                                                                                                                         |

|       |          |                                                                                                                                                                                                                                                                                                                                                                                                                                                                                                                                                                                                                                                                                                                                                                                                                                                                                                                                                                                                                                                                                                                                                                                                                                                                                                                  |
|-------|----------|------------------------------------------------------------------------------------------------------------------------------------------------------------------------------------------------------------------------------------------------------------------------------------------------------------------------------------------------------------------------------------------------------------------------------------------------------------------------------------------------------------------------------------------------------------------------------------------------------------------------------------------------------------------------------------------------------------------------------------------------------------------------------------------------------------------------------------------------------------------------------------------------------------------------------------------------------------------------------------------------------------------------------------------------------------------------------------------------------------------------------------------------------------------------------------------------------------------------------------------------------------------------------------------------------------------|
|       |          | CTLA4(660), ITPR1(670), SLC6A4(677), BDNF(693), CHRM2(720), SLC6A2(737), GPR50(801), HTR3A(812), FGFR2(844), CACNA1C(856), GSK3A(932), LRP1(964), AVPR1A(1022), HTR6(1059), MTHFR(1087), GAD1(1094), PSMD9(1095), PLA2G2A(1120), GRIN1(1141), CYP2C9(1149), GABBR1(1165), AVPR1B(1171), GABRA6(1181), HTR2B(1187), CCND2(1196), PLA2G4A(1214), MAOA(1228), ACSL4(1241), P2RX7(1251), NGFR(1261), GRIA3(1394), FGFR1(1451), OPRM1(1478), HTR7(1491), FGFR4(1530), CRHBP(1538), SLC6A3(1571), ADCY9(1595), PRKCH(1604), FGFR3(1652), GRIA1(1721), GRIA4(1726), HTR5A(1748), GABRA3(1749), GRM7(1762), DRD5(1769), GRIN2C(1861), WFS1(1971), GRIN2A(1975), HTR4(1997)                                                                                                                                                                                                                                                                                                                                                                                                                                                                                                                                                                                                                                               |
| GPR50 | 1.47E-30 | DAOA(13), HTR2A(37), ADRA2B(38), DTNBP1(46), HTR6(63), HTR2C(68), GNB3(78), ADRB1(88), SLC6A4(119), HTR5A(134), TPH2(135), HTR1A(139), GNAS(142), DRD2(144), GRIK3(158), DRD4(173), ESR1(186), LEPR(189), AGTR1(190), DRD1(198), AVPR1B(216), DRD3(220), HTR2B(235), ADRA1A(237), GNAL(241), IL6(262), GABRA3(267), LEP(271), POMC(303), TNF(307), APOE(310), DISC1(313), NR3C1(325), ADRA2C(340), HTR4(343), ADRA1B(345), ADRA2A(353), HTR1B(355), CCKAR(365), DRD5(371), FZD3(382), CTLA4(388), GABBR1(389), GRIA4(396), HTR7(397), CRHR1(401), HTR3A(402), AR(420), ACE(438), FGFR2(440), ADCY9(442), IL1B(447), CCKBR(451), TPH1(456), GRIK4(460), GRIA3(469), ESR2(478), MTHFR(530), COMT(555), ABCB1(571), OPRD1(577), CYP2C9(630), CHRM2(642), AVPR1A(648), TACR1(690), GMIP(747), OPRK1(757), MAOA(763), GRM7(820), CRHR2(823), LRP1(868), CHRFBAM7A(960), ADORA2A(972), GABRA6(984), NOS3(995), SERPINA3(1159), FGFR4(1188), FGFR1(1225), ITPR1(1237), GRIN1(1279), NPY(1283), TAC1(1325), OPRM1(1379), SLC6A2(1410), P2RX7(1425), SYN3(1450), CCL2(1451), FGFR3(1484), PSMD9(1506), WFS1(1509), TH(1522), ROS1(1690), GRIA1(1702), PSMB4(1717), CRHBP(1741), SLC6A3(1794), CNR1(1948)                                                                                                                  |
| OPRD1 | 6.10E-30 | OPRK1(1), OPRM1(2), PENK(8), DRD1(21), DRD2(36), ADRA2A(45), ADRA2B(49), HTR3A(58), ADORA2A(59), DRD3(60), CCKBR(61), POMC(71), ADRB1(74), TACR1(78), ADRA1A(85), HTR1A(89), ADRA1B(100), GABRA6(101), CNR1(106), HTR2B(120), GRIA4(126), HTR2C(130), GRIN1(131), HTR5A(132), HTR2A(133), GRIA3(136), AGTR1(143), ADRA2C(157), HTR1B(159), CHRM2(160), DRD5(165), CD3E(168), ITPR1(172), GABBR1(174), HTR6(182), ESR1(187), HTR7(193), GRIK3(194), GRM7(196), HTR4(202), GRIN2D(210), GRIA1(216), NR3C1(221), GRIN2C(222), IL6(225), TAC1(228), NFKB1(232), CRHR1(242), GRIN2A(246), CREB1(277), TNF(290), FGFR2(297), PRKCH(300), GABRA3(315), CRHR2(347), ESR2(348), GNAS(349), AVPR1B(351), ADCY9(352), GRIN2B(370), P2RX7(408), IL1B(414), CCKAR(417), TH(425), AVPR1A(435), CACNA1C(489), GRIA2(516), FGFR1(534), GABRA5(560), LEPR(572), LRP1(628), AR(634), GRIK1(650), AKT1(656), GRIK5(678), GRIN3A(737), GRIK4(767), P2RX4(768), NGFR(817), GRIK2(824), FGFR4(912), GNAL(918), CCK(1019), SLC6A2(1030), FGFR3(1045), CHRNA7(1082), HTR3B(1102), GAD1(1143), ROS1(1192), NTRK2(1206), ABCB1(1233), GPR50(1267), GSK3B(1293), GYPA(1302), NOS1(1359), APOE(1569), DRD4(1598), CCND2(1632), NTRK3(1644), M6PR(1675), FKBP5(1696), BDNF(1746), STAT3(1795), LEP(1828), NPY(1856), CCL2(1974), SLC6A4(1984) |
| NOS3  | 6.26E-30 | NOS1(1), AGTR1(19), TNF(21), IL6(23), APOE(34), AKT1(37), IL1B(41), ACE(42), ADRA2B(67), GNB3(89), LEPR(103), ESR1(105), ADRB1(122), GSK3B(127), TAC1(138), LEP(139), MMP2(142), PDE5A(143), MTHFR(147), ABCB1(169), NFKB1(179), GSK3A(196), HTR2A(216), CCL2(219), TACR1(224), ADRA1A(227), SLC6A4(228), ADRA2A(229), CTLA4(272), DRD1(278), ESR2(280), ADORA2A(281), CACNA1C(286),                                                                                                                                                                                                                                                                                                                                                                                                                                                                                                                                                                                                                                                                                                                                                                                                                                                                                                                             |

|        |          |                                                                                                                                                                                                                                                                                                                                                                                                                                                                                                                                                                                                                                                                                                                                                                                                                                                                                                                                                                                                                                                                                                                                                                                                                                                                                                                                                                                                                                                                                             |
|--------|----------|---------------------------------------------------------------------------------------------------------------------------------------------------------------------------------------------------------------------------------------------------------------------------------------------------------------------------------------------------------------------------------------------------------------------------------------------------------------------------------------------------------------------------------------------------------------------------------------------------------------------------------------------------------------------------------------------------------------------------------------------------------------------------------------------------------------------------------------------------------------------------------------------------------------------------------------------------------------------------------------------------------------------------------------------------------------------------------------------------------------------------------------------------------------------------------------------------------------------------------------------------------------------------------------------------------------------------------------------------------------------------------------------------------------------------------------------------------------------------------------------|
|        |          | ADRA1B(295), PDE2A(301), CHRM2(307), TH(308), SERPINA3(325), ADRA2C(342), DRD3(344), DRD2(346), POMC(408), GNAS(424), HTR1B(444), HTR2B(448), HTR1A(452), CYP2C9(462), NR3C1(516), NPY(617), CRHR1(631), ITPR1(652), SLC6A2(679), CCKBR(700), MAOA(726), HTR2C(730), CREB1(737), AVPR1A(745), CCKAR(778), AR(807), PLA2G4A(814), PENK(868), BDNF(873), P2RX7(885), ADCY9(910), GRIN2C(937), HTR6(955), SLC6A3(1015), DTNBP1(1028), STAT3(1062), GRIN1(1070), DRD4(1071), PLA2G2A(1137), FGFR2(1145), HTR3A(1165), FGFR1(1171), GRM7(1193), GRIA4(1248), GABBR1(1297), CNR1(1361), GRIA1(1407), TPH2(1413), CRHR2(1428), DRD5(1430), PRKCH(1438), GRIA3(1447), GRIN2A(1479), HTR7(1498), CCND2(1521), NGFR(1535), GRIN2D(1565), LRP1(1572), COMT(1576), PDE11A(1594), GRIK3(1602), GABRA6(1633), GRIN2B(1671), P2RX4(1680), CHRNA7(1685), CAMKK2(1693), FGFR4(1706), GAD1(1727), FGFR3(1794), TPH1(1806), OPRM1(1829), PDE1A(1844)                                                                                                                                                                                                                                                                                                                                                                                                                                                                                                                                                           |
| BDNF   | 1.68E-29 | NTRK2(2), NTRK3(7), NGFR(10), TH(27), CNTF(28), GRIN1(40), GRIA3(44), GRIA1(45), DRD3(51), GRIN2C(53), GRIN2A(66), GRIN2B(72), IL6(74), TNF(78), DRD1(83), GAD1(85), GRIA2(89), HTR1A(92), HTR2A(94), CREB1(97), DRD2(104), GABBR1(105), GRIA4(114), HTR1B(122), TAC1(123), DNAJB2(128), SLC6A4(138), GRIN2D(142), IL1B(159), TACR1(162), GRM7(167), GRIK3(173), LEPR(183), GABRA5(195), APOE(214), NOS1(221), GABRA3(226), GABRA6(229), HTR2C(241), ADORA2A(258), PENK(271), FGFR2(285), POMC(292), GRIN3A(294), HTR3A(299), AKT1(300), GRIK4(307), ESR1(316), NPY(322), ITPR1(325), ADRA2C(340), ADRA2B(344), CNR1(366), SLC6A2(370), CRHR1(387), AGTR1(390), TPH2(397), LEP(430), DTNBP1(465), GRIK1(468), SLC6A3(484), CRHR2(512), FGFR1(513), DRD5(525), GSK3B(542), ADORA2A(549), NR3C1(553), ADRB1(578), SLC6A1(582), ADRA1B(587), NOS3(590), CHRM2(597), NFKB1(604), HTR5A(605), GNAS(632), MAOA(633), CACNA1C(654), ESR2(669), CCKBR(671), ABCB1(688), HTR6(691), HTR2B(701), GRIK2(736), DRD4(753), FGFR3(780), ADRA1A(794), ADCY9(858), CHRNA7(889), FZD3(909), FGFR4(932), GRIK5(995), MMP2(1015), SYN3(1049), OPRM1(1058), P2RX7(1060), HTR7(1082), STAT3(1130), OLIG2(1131), ROS1(1159), KCNC2(1237), CCND2(1255), OLIG1(1275), CCKAR(1294), AR(1302), CCK(1305), OPRK1(1342), CCL2(1383), PDE10A(1408), SERPINA3(1415), CTLA4(1431), HTR4(1457), TPH1(1458), OPRD1(1542), DDC(1549), LRP1(1690), GSK3A(1763), GNAL(1764), DAOA(1809), CAMKK2(1828), AVPR1A(1865), COMT(1890) |
| CHRNA7 | 4.02E-29 | CHRFAM7A(7), HTR3A(25), CHRM2(33), GABRA3(42), GRIA3(44), CACNA1C(51), GABRA6(54), GRIA4(55), GRIA1(65), GRIN1(67), GABRA5(69), GRIN2D(70), GRIK3(71), ADRA2B(73), GABBR1(83), GRIN2C(85), GRIN2A(93), ADRA2C(96), DRD1(102), GRIN2B(107), TNF(108), ADRA1A(109), ADORA2A(111), HTR1A(116), ADRB1(117), DRD2(119), ADRA1B(124), GRIA2(129), HTR2A(130), HTR3B(131), ITPR1(139), HTR1B(143), DRD3(147), GRIN3A(150), GRM7(154), TH(180), HTR5A(188), ESR1(191), TACR1(193), ADORA2A(195), GNAS(196), GRIK4(199), HTR2C(201), GRIK5(206), HTR6(230), GRIK1(231), HTR2B(237), GRIK2(244), IL6(249), P2RX7(250), DRD5(260), P2RX4(269), HTR7(282), AGTR1(285), TAC1(308), DTNBP1(324), IL1B(335), NOS1(369), KCNC2(393), GAD1(399), NR3C1(406), CCKBR(420), ESR2(423), HTR4(435), FGFR2(459), CNR1(464), SERPINA3(475), CRHR1(489), PSMB4(521), SLC6A1(526), AR(540), NGFR(546), BDNF(565), GNAL(591), OPRM1(596), OPRD1(601), PENK(602), CRHR2(608), POMC(614), NTRK2(633), APOE(651), OPRK1(686), LEPR(699), SLC6A4(709), NFKB1(714), CREB1(778), AKT1(787), NOS3(791), CCKAR(800),                                                                                                                                                                                                                                                                                                                                                                                                           |



|        |          |                                                                                                                                                                                                                                                                                                                                                                                                                                                                                                                                                                                                                                                                                                                                                                                                                                                                                                                                                                                                                                                                                                                                                                                                                                                                                                                                                                                   |
|--------|----------|-----------------------------------------------------------------------------------------------------------------------------------------------------------------------------------------------------------------------------------------------------------------------------------------------------------------------------------------------------------------------------------------------------------------------------------------------------------------------------------------------------------------------------------------------------------------------------------------------------------------------------------------------------------------------------------------------------------------------------------------------------------------------------------------------------------------------------------------------------------------------------------------------------------------------------------------------------------------------------------------------------------------------------------------------------------------------------------------------------------------------------------------------------------------------------------------------------------------------------------------------------------------------------------------------------------------------------------------------------------------------------------|
|        |          | AVPR1A(833), ADCY9(864), SLC6A2(918), DRD4(931), AVPR1B(960), LRP1(980), FGFR1(1025), SLC6A3(1026), FGFR3(1105), GSK3B(1141), ROS1(1208), FZD3(1211), GNB3(1246), NPY(1252), DAOA(1275), ANK3(1344), ABCB1(1358), LEP(1455), PSMD9(1616), NTRK3(1634), MMP2(1744), FGFR4(1769)                                                                                                                                                                                                                                                                                                                                                                                                                                                                                                                                                                                                                                                                                                                                                                                                                                                                                                                                                                                                                                                                                                    |
| LEPR   | 1.30E-28 | LEP(1), IL6(19), NPY(21), TNF(27), POMC(42), AGTR1(71), ADRA2B(76), IL1B(93), APOE(94), ESR1(112), HTR2C(124), NOS3(174), STAT3(175), ADRB1(180), NR3C1(196), AKT1(215), TACR1(221), CCKBR(238), DRD1(248), TH(258), DRD2(260), HTR1A(268), TAC1(269), GNAS(288), NOS1(289), ESR2(296), ADRA2A(299), DRD3(309), CCKAR(313), HTR2A(333), CRHR1(356), ADRA1B(357), ABCB1(361), MMP2(368), ADRA1A(383), ADORA2A(387), FGFR2(422), HTR1B(424), CRHR2(443), ITPR1(451), ACE(487), NFKB1(501), CCL2(503), AR(512), PENK(532), GNB3(565), ADRA2C(570), CTLA4(579), HTR3A(603), BDNF(624), CHRM2(643), HTR2B(734), CNR1(740), FGFR1(774), LRP1(776), CREB1(786), GAD1(839), PSMD9(843), HTR6(844), GRIA3(858), GABBR1(866), GRIN1(868), GSK3B(869), CACNA1C(872), NGFR(874), SLC6A4(888), SERPINA3(907), CCK(913), AVPR1B(971), GABRA6(984), GRIA4(992), FGFR3(1004), AVPR1A(1068), FGFR4(1070), P2RX7(1071), GPR50(1105), GRIA1(1158), GSK3A(1187), WFS1(1204), SLC6A2(1254), CCND2(1279), CNTF(1312), HTR5A(1375), ACSL4(1415), HTR4(1437), HTR7(1468), OPRM1(1472), GABRA3(1502), DRD5(1520), GRIN2A(1554), GRIN2C(1570), OPRD1(1603), GRM7(1619), ROS1(1643), PRKCH(1664), GRIK3(1713), ADCY9(1769), GRIN2D(1793), MAOA(1796), PLA2G4A(1817), CD3E(1839), PLA2G2A(1844), CYP2C9(1848), GRIN2B(1937)                                                                                   |
| GABBR1 | 1.94E-28 | SLC6A1(10), GABRA5(13), GABRA3(14), GABRA6(26), GAD1(30), GRIA3(43), GRM7(44), GRIK3(46), GRIA1(47), HTR1A(53), HTR3A(55), GRIN1(56), DRD1(59), GRIA4(63), GRIN2C(67), GRIA2(68), GRIN2D(70), DRD2(71), TACR1(78), GRIN2B(79), GRIN2A(83), GRIK1(93), HTR2A(95), HTR1B(103), GRIK5(107), CCKBR(108), ITPR1(111), ADRA2B(115), GRIK2(128), DRD3(129), HTR5A(133), ADRA1A(139), ADORA2A(147), CHRM2(151), ADRA2C(152), CNR1(154), DRD5(162), CRHR1(168), HTR2C(172), CACNA1C(175), GRIN3A(176), ADRA1B(181), GRIK4(190), ADRB1(191), CRHR2(195), HTR4(209), AGTR1(219), TAC1(229), KCNC2(235), CHRNA7(238), HTR2B(247), HTR7(260), ADRA2A(264), TH(268), BDNF(272), ESR1(279), P2RX7(284), AVPR1A(307), HTR6(320), NTRK2(350), TNF(359), IL6(362), GNAS(367), OPRD1(374), OPRK1(381), NR3C1(395), OPRM1(422), FGFR2(436), CCKAR(448), AVPR1B(450), HTR3B(472), ESR2(487), IL1B(488), P2RX4(490), NPY(534), NFKB1(556), DRD4(577), GNAL(579), CREB1(580), PENK(582), LEPR(625), AKT1(633), NGFR(637), POMC(727), NOS1(737), SLC6A4(774), ADCY9(782), PCLO(825), MAOB(873), FGFR1(877), AR(907), PDE1A(1066), SLC6A2(1104), ROS1(1132), SLC6A3(1160), FGFR3(1265), CCK(1271), NTRK3(1284), FGFR4(1287), ANK3(1333), ABCB1(1347), APOE(1370), LRP1(1409), MAOA(1494), GSK3B(1495), PSMB4(1528), GPR50(1628), LEP(1697), PDE10A(1705), GNB3(1739), NOS3(1900), DTNBP1(1909), CD3E(1999) |
| P2RX7  | 2.33E-28 | P2RX4(3), IL1B(15), IL6(21), TNF(29), ADORA2A(34), HTR3A(42), GRIA3(57), ITPR1(58), GRM7(65), CACNA1C(67), GRIK3(88), GRIA4(96), TACR1(100), DRD1(105), ADRA2B(110), GABBR1(130), ADRB1(132), GRIA1(134), AGTR1(146), HTR2A(160), GRIN1(168), ESR1(178), GRIN2C(182), DRD2(192), AKT1(204), NFKB1(206), ADRA1A(211), GRIN2D(215), CHRM2(218), HTR1A(227), TAC1(251), HTR2B(252), DRD3(275), HTR2C(277), GRIA2(283), ADRA2C(301), NR3C1(317), CCKBR(327), ADRA2A(338), GRIN2A(364), HTR5A(376), HTR7(377), GRIN2B(381), FGFR2(395), GABRA3(401), HTR1B(402), ADRA1B(415), GABRA6(424), ABCB1(448), CNR1(463),                                                                                                                                                                                                                                                                                                                                                                                                                                                                                                                                                                                                                                                                                                                                                                      |

|       |          |                                                                                                                                                                                                                                                                                                                                                                                                                                                                                                                                                                                                                                                                                                                                                                                                                                                                                                                                                                                                                                                                                                                                                                                                                                                              |
|-------|----------|--------------------------------------------------------------------------------------------------------------------------------------------------------------------------------------------------------------------------------------------------------------------------------------------------------------------------------------------------------------------------------------------------------------------------------------------------------------------------------------------------------------------------------------------------------------------------------------------------------------------------------------------------------------------------------------------------------------------------------------------------------------------------------------------------------------------------------------------------------------------------------------------------------------------------------------------------------------------------------------------------------------------------------------------------------------------------------------------------------------------------------------------------------------------------------------------------------------------------------------------------------------|
|       |          | GRIK5(468), LEPR(482), CRHR1(514), ESR2(523), CHRNA7(547), HTR6(554), GRIK1(560), OPRD1(565), CCL2(568), GRIK2(582), TH(611), NGFR(613), GRIN3A(619), CRHR2(667), OPRK1(674), FGFR1(709), MMP2(712), DRD5(726), HTR4(728), GNAS(752), GRIK4(774), STAT3(797), AVPR1A(820), PLA2G4A(833), LRP1(848), CTLA4(857), NOS3(883), APOE(894), AVPR1B(904), CCKAR(938), POMC(939), NOS1(954), HTR3B(955), OPRM1(956), AR(1006), ADCY9(1035), CREB1(1043), GSK3B(1072), GABRA5(1074), PENK(1080), FGFR3(1136), ROS1(1137), SLC6A1(1185), FGFR4(1215), PLA2G2A(1221), LEP(1281), CD3E(1335), PSMD9(1351), NTRK2(1479), BDNF(1566), GAD1(1569), NPY(1629), KCNC2(1720), SLC6A4(1754), SERPINA3(1817), SLC6A2(1882), PRKCH(1945)                                                                                                                                                                                                                                                                                                                                                                                                                                                                                                                                          |
| APOE  | 5.69E-28 | IL6(28), TNF(41), LRP1(42), NOS3(60), IL1B(64), AGTR1(74), LEPR(76), SERPINA3(81), LEP(99), ESR1(102), ACE(105), ADRA2B(122), ABCB1(135), CCL2(137), MTHFR(157), GNB3(161), SLC6A4(175), HTR2A(178), ADRB1(224), CTLA4(243), MMP2(246), DRD2(252), ESR2(271), NOS1(299), HTR1B(314), TAC1(318), ADRA2A(325), TH(328), DRD3(330), POMC(332), GNAS(333), CYP2C9(352), DRD1(356), CHRM2(366), HTR1A(377), HTR6(387), TACR1(391), ADRA2C(399), NPY(438), ADORA2A(459), NR3C1(465), ADRA1B(482), DTNBP1(509), BDNF(525), AKT1(566), HTR2C(573), MAOA(588), NFKB1(598), AR(628), SLC6A3(652), PENK(658), ADRA1A(694), CCKBR(703), CCKAR(731), SLC6A2(732), PLA2G2A(735), CRHR1(748), DRD4(797), COMT(917), GSK3B(924), ITPR1(937), FGFR2(941), GRIN1(967), GRIK3(975), GRIA4(988), CREB1(1017), GAD1(1021), CACNA1C(1043), GRIA1(1044), NGFR(1054), GRIA3(1112), CNR1(1150), HP(1165), HTR3A(1175), GPR50(1246), P2RX7(1251), CD3E(1255), GABRA6(1267), GABBR1(1289), CCND2(1297), TPH2(1310), GRIN2A(1329), CRHR2(1338), FGFR4(1386), TFCP2(1402), PLA2G4A(1496), FGFR3(1531), DRD5(1598), GRIN2B(1604), GRM7(1625), GRIN2D(1657), FGFR1(1673), DAOA(1676), PSMD9(1701), WFS1(1703), GABRA3(1771), OPRM1(1801), CCK(1827), GSK3A(1867), ACSL4(1920), GRIN2C(1935) |
| GRIK3 | 1.34E-26 | GRIK5(1), GRIK2(2), GRIK4(3), GRIK1(4), GRIA3(5), GRIA4(6), GRIA1(7), GRIA2(9), GRM7(10), GRIN1(21), GRIN2D(22), GRIN2B(25), GRIN2C(26), GRIN2A(27), GABBR1(38), GRIN3A(39), GABRA6(45), GABRA3(48), HTR3A(50), GAD1(54), HTR2A(60), GABRA5(67), HTR6(68), DRD1(71), ADRA2B(73), DRD2(76), DRD3(91), DTNBP1(97), HTR5A(99), HTR1A(122), HTR1B(141), HTR2C(149), ITPR1(178), ADRA2C(180), P2RX7(199), SLC6A1(218), CHRNA7(219), ADRA1A(220), HTR7(231), GNAS(236), CACNA1C(237), TACR1(238), DRD5(241), HTR3B(249), ADRB1(256), DRD4(263), HTR2B(264), ESR1(271), ADORA2A(282), DAOA(283), CHRM2(300), SLC6A4(313), CNR1(340), AGTR1(351), FGFR2(377), HTR4(451), OPRK1(497), ADRA1B(498), PCLO(510), OPRD1(519), CCKBR(534), CRHR1(544), GNB3(561), PSMB4(562), BDNF(570), ADRA2A(571), NR3C1(585), P2RX4(641), TH(652), GNAL(666), TNF(674), CRHR2(711), ESR2(716), TAC1(854), IL6(937), OPRM1(960), KCNC2(995), NTRK2(1004), SLC6A2(1013), CCKAR(1016), GPR50(1136), FZD3(1159), TDRD3(1181), IL1B(1186), MAOA(1237), ADCY9(1310), ROS1(1344), AVPR1A(1436), PHACTR3(1490), AR(1553), AVPR1B(1568), MYO5B(1591), FGFR3(1626), SLC6A3(1813), FGFR1(1911)                                                                                                    |
| PENK  | 1.55E-25 | OPRD1(2), OPRM1(3), OPRK1(4), POMC(6), TH(16), DRD1(21), IL6(24), DRD2(32), TAC1(33), DRD3(46), IL1B(61), TACR1(76), TNF(81), GAD1(103), HTR1A(114), HTR1B(138), CCKBR(159), CNR1(160), CRHR1(181), NR3C1(271), ADRA2C(276), NPY(277), ESR1(289), CRHR2(314), ADRA2B(333), ADRA2A(349), ADORA2A(351),                                                                                                                                                                                                                                                                                                                                                                                                                                                                                                                                                                                                                                                                                                                                                                                                                                                                                                                                                        |

|        |          |                                                                                                                                                                                                                                                                                                                                                                                                                                                                                                                                                                                                                                                                                                                                                                                                                                                                                                                                                                                                                                                                                                                                                                                                                                                                                                                                                                                        |
|--------|----------|----------------------------------------------------------------------------------------------------------------------------------------------------------------------------------------------------------------------------------------------------------------------------------------------------------------------------------------------------------------------------------------------------------------------------------------------------------------------------------------------------------------------------------------------------------------------------------------------------------------------------------------------------------------------------------------------------------------------------------------------------------------------------------------------------------------------------------------------------------------------------------------------------------------------------------------------------------------------------------------------------------------------------------------------------------------------------------------------------------------------------------------------------------------------------------------------------------------------------------------------------------------------------------------------------------------------------------------------------------------------------------------|
|        |          | HTR3A(358), LEPR(371), GRIA3(427), CCK(434), ADRA1B(453), AGTR1(472), GRIN1(478), CREB1(493), HTR2A(516), FGFR2(566), GRIA4(570), GNAS(587), ESR2(594), DRD5(629), GRIA1(676), LEP(681), HTR2C(701), GABBR1(703), GRIN2C(752), ADRA1A(764), ABCB1(778), ADRB1(780), NOS1(800), GABRA6(814), CCKAR(836), NFKB1(845), SLC6A3(861), SLC6A2(869), AVPR1B(872), BDNF(885), APOE(906), GRIN2D(919), ITPR1(921), PDE10A(955), CD3E(1062), SERPINA3(1085), SLC6A4(1216), PSMB4(1227), GABRA3(1262), CACNA1C(1269), HTR5A(1272), CHRM2(1293), NGFR(1341), AVPR1A(1376), AKT1(1377), AR(1389), GRM7(1406), CCND2(1431), HTR2B(1435), MMP2(1445), CTLA4(1541), GNAL(1542), FGFR1(1622), ROS1(1638), GRIN2A(1735), GRIK3(1805), GABRA5(1878), ADCY9(1894), FGFR4(1979)                                                                                                                                                                                                                                                                                                                                                                                                                                                                                                                                                                                                                             |
| GRIN1  | 2.47E-25 | GRIN2C(1), GRIN2D(2), GRIN2A(3), GRIN2B(4), GRIN3A(5), GRIA3(7), GRIA1(9), GRIA4(11), GRIA2(14), GRIK3(20), GRIK1(21), GRIK4(23), DRD1(25), GRIK5(26), GRIK2(29), GRM7(36), HTR3A(50), GABBR1(58), GABRA6(67), CACNA1C(77), DRD2(85), GABRA5(88), GABRA3(97), ITPR1(121), DRD3(124), HTR1A(126), TACR1(136), BDNF(142), HTR1B(148), HTR2A(157), ADORA2A(159), CREB1(176), DRD5(178), ADRA2B(182), NTRK2(189), GAD1(215), TH(225), CHRNA7(244), HTR2C(249), HTR5A(252), ADRA2C(253), CNR1(264), HTR3B(273), CHRM2(284), NOS1(288), ADRA1A(291), ADRB1(302), HTR2B(310), ADRA2A(336), OPRK1(344), CRHR1(350), NR3C1(351), ESR1(352), ADRA1B(356), OPRD1(358), HTR6(382), AGTR1(385), OPRM1(399), CCKBR(402), HTR7(406), P2RX7(417), TAC1(418), NGFR(428), HTR4(430), IL6(435), FGFR2(437), CRHR2(448), TNF(451), P2RX4(457), GNAS(481), IL1B(517), PENK(543), KCNC2(625), SLC6A1(628), ESR2(664), AKT1(670), AVPR1A(719), LEPR(739), DRD4(774), AVPR1B(782), PSMB4(821), FGFR1(831), CCKAR(867), ROS1(871), GSK3B(925), NTRK3(926), AR(967), LRP1(977), POMC(998), NPY(1027), NFKB1(1034), MYO5B(1070), GNAL(1096), DTNBP1(1104), ADCY9(1146), SLC6A2(1157), APOE(1216), FGFR3(1289), SLC6A3(1297), SLC6A4(1368), FGFR4(1372), CAMKK2(1441), PDE1A(1462), FZD3(1512), CHRFBAM7A(1564), CCND2(1573), PSMD9(1613), PDE10A(1631), CD3E(1691), ANK3(1706), DAOA(1785), NOS3(1802), LEP(1923) |
| GABRA3 | 1.86E-23 | GABRA5(8), GABRA6(9), GABBR1(14), SLC6A1(22), GAD1(36), GRIA3(45), GRIK3(65), GRIA4(69), GRIN2D(70), HTR3A(74), GRIN2C(76), ADRA2B(77), GRIA1(78), ADRA2C(82), GRIN2A(83), GRIN1(92), GRIN2B(107), DRD1(112), GRIA2(120), DRD2(124), HTR1A(126), CACNA1C(127), CHRNA7(135), ADRA2A(140), ADRA1B(147), GRIK5(148), DRD3(157), GRIK1(158), ADRB1(160), HTR5A(165), HTR2A(166), GRM7(170), ADRA1A(171), GRIN3A(184), GRIK2(189), GRIK4(190), KCNC2(197), HTR3B(201), DRD5(203), GNAS(224), HTR1B(226), ESR1(271), TNF(273), HTR2C(278), TACR1(288), PSMB4(297), CHRM2(309), HTR6(334), TH(356), ITPR1(365), GNAL(381), ADORA2A(384), CCKBR(409), HTR2B(421), CNR1(455), AGTR1(516), NR3C1(545), ESR2(558), IL6(592), GNB3(617), BDNF(633), CRHR1(635), CRHR2(645), FGFR2(658), DRD4(685), SLC6A4(701), HTR7(708), P2RX7(719), OPRD1(745), IL1B(791), POMC(853), P2RX4(889), HTR4(902), OPRK1(905), AVPR1B(930), TAC1(946), OPRM1(973), AVPR1A(993), PENK(1010), AR(1057), NTRK2(1067), DTNBP1(1117), SERPINA3(1177), CHRFBAM7A(1183), LEPR(1241), FZD3(1295), CCKAR(1311), GPR50(1315), FGFR1(1341), ADCY9(1351), ROS1(1419), SLC6A3(1425), SLC6A2(1501), FGFR3(1547), LRP1(1549), CD3E(1625), TPH2(1634), NGFR(1663), ANK3(1666), NOS1(1672), NPY(1742), PSMD9(1744), FGFR4(1760), CREB1(1984)                                                                                           |
| GRM7   | 3.77E-23 | GRIA3(8), GRIA1(9), GRIA4(10), GRIK3(11), GRIA2(19), GRIK1(21), GRIK5(26),                                                                                                                                                                                                                                                                                                                                                                                                                                                                                                                                                                                                                                                                                                                                                                                                                                                                                                                                                                                                                                                                                                                                                                                                                                                                                                             |

|        |          |                                                                                                                                                                                                                                                                                                                                                                                                                                                                                                                                                                                                                                                                                                                                                                                                                                                                                                                                                                                                                                                                                                                                                                                                                                                                                                               |
|--------|----------|---------------------------------------------------------------------------------------------------------------------------------------------------------------------------------------------------------------------------------------------------------------------------------------------------------------------------------------------------------------------------------------------------------------------------------------------------------------------------------------------------------------------------------------------------------------------------------------------------------------------------------------------------------------------------------------------------------------------------------------------------------------------------------------------------------------------------------------------------------------------------------------------------------------------------------------------------------------------------------------------------------------------------------------------------------------------------------------------------------------------------------------------------------------------------------------------------------------------------------------------------------------------------------------------------------------|
|        |          | GRIN1(29), GABBR1(31), GRIK2(36), CACNA1C(38), GRIN2D(47), GRIK4(48), GRIN2C(51), ITPR1(52), GRIN2B(54), GRIN2A(58), HTR1A(68), ADRA2C(69), DRD1(71), HTR1B(72), GRIN3A(76), ADRA1A(79), HTR3A(84), ADRA2B(86), ADORA2A(126), CHRM2(132), DRD2(133), ADRB1(139), TACR1(144), GAD1(145), ADRA2A(148), P2RX7(157), ADRA1B(159), GABRA3(162), HTR5A(173), CNR1(175), HTR2A(184), GABRA5(190), HTR7(193), GABRA6(201), CCKBR(202), NR3C1(207), CRHR1(216), DRD3(220), PCLO(222), HTR2C(238), CRHR2(246), HTR4(250), DRD5(261), CREB1(265), SLC6A1(278), AGTR1(284), AVPR1B(293), HTR2B(298), CAMKK2(309), ADCY9(321), TAC1(335), OPRD1(340), TH(343), BDNF(350), P2RX4(357), ESR1(396), IL6(399), OPRK1(409), GNAS(412), CHRNA7(415), NTRK2(432), TNF(450), HTR6(453), PDE1A(456), AVPR1A(479), KCNC2(517), NOS1(537), OPRM1(567), CCKAR(584), FGFR2(684), AKT1(700), ESR2(715), PENK(737), NGFR(774), MYO5B(781), IL1B(808), NPY(852), SLC6A2(858), PRKCH(879), SLC6A4(887), LEPR(894), PDE10A(962), POMC(988), ANK3(1036), ROS1(1044), DRD4(1052), GNAL(1071), HTR3B(1075), FGFR1(1119), GSK3B(1173), AR(1233), APOE(1243), NOS3(1289), PLA2G2A(1338), CCK(1355), NFKB1(1375), FGFR4(1403), LRP1(1490), SYN3(1516), PLA2G4A(1537), ABCB1(1629), NTRK3(1690), FGFR3(1780), SLC6A3(1904), LEP(1911), DTNBP1(1972) |
| GRIN2D | 5.78E-23 | GRIN2C(1), GRIN2A(2), GRIN2B(3), GRIN1(4), GRIN3A(5), GRIA3(7), GRIA4(9), GRIA1(11), GRIA2(15), GRIK3(17), GRIK1(19), GRIK5(23), GABRA6(26), GRIK4(28), GRIK2(37), CACNA1C(48), DRD1(52), HTR3A(53), GRM7(63), GABRA3(68), GABBR1(84), GABRA5(91), HTR3B(108), ITPR1(126), ADRA2B(161), DRD2(162), TACR1(190), HTR1A(199), ADORA2A(203), HTR2A(207), DRD3(214), CHRNA7(233), ADRA2C(235), HTR5A(241), KCNC2(250), HTR2B(259), CD3E(271), HTR1B(285), DRD5(292), ADRA1A(296), GAD1(305), ADRA2A(308), PSMB4(314), HTR2C(317), NOS1(325), TH(335), CHRM2(342), ESR1(350), P2RX4(351), ADRA1B(375), HTR6(395), BDNF(405), NTRK2(409), P2RX7(422), HTR7(436), OPRD1(460), CNR1(462), AGTR1(476), ADRB1(477), OPRK1(491), ESR2(501), CCKBR(514), CRHR1(546), TAC1(552), NR3C1(565), CRHR2(589), CREB1(626), GNAS(640), IL1B(666), HTR4(674), NGFR(675), IL6(681), FGFR2(685), PENK(699), TNF(720), OPRM1(785), SLC6A1(791), AVPR1B(861), GNAL(911), AVPR1A(982), FGFR1(1041), PRKCH(1119), PSMD9(1143), AKT1(1163), NTRK3(1183), LRP1(1194), LEPR(1207), FGFR4(1235), NFKB1(1272), ADCY9(1329), SLC6A2(1387), ROS1(1397), AR(1418), CCKAR(1424), PHACTR3(1463), POMC(1464), APOE(1550), NPY(1595), DRD4(1617), GSK3B(1641), FGFR3(1656), ANK3(1669), PDE10A(1729), CCND2(1785), FZD3(1840), MYO5B(1859)            |
| GRIK2  | 1.30E-22 | GRIK5(1), GRIK1(2), GRIK3(3), GRIK4(4), GRIA4(5), GRIA3(6), GRIA1(7), GRIA2(8), GRIN1(12), GRIN2D(15), GRIN2C(16), GRIN2A(17), GRIN2B(18), GRM7(21), GRIN3A(37), HTR3A(42), GABBR1(46), GABRA3(59), GABRA6(61), CACNA1C(66), GABRA5(81), DRD1(84), ADORA2A(131), ADRA2B(134), DRD2(137), ITPR1(142), HTR3B(159), HTR2A(162), HTR1A(169), TACR1(180), HTR2C(182), GAD1(186), HTR1B(190), HTR5A(218), CHRNA7(230), P2RX4(238), DRD3(239), HTR6(241), CHRM2(244), ADRB1(246), ADRA2C(249), P2RX7(250), HTR2B(258), DRD5(260), ADRA1A(277), HTR7(311), HTR4(328), CNR1(343), GNAS(345), ADRA2A(354), KCNC2(368), NR3C1(370), ESR1(372), TH(397), NTRK2(398), ADRA1B(407), BDNF(429), SLC6A1(430), OPRD1(434), CRHR2(466), AGTR1(468), TAC1(473), OPRK1(484), FGFR2(486), CRHR1(496), CCKBR(522), IL6(549), DTNBP1(557), PSMB4(558), TNF(601), AVPR1A(641), OPRM1(657), AVPR1B(690), ESR2(718), PCLO(756), GNAL(786), CREB1(802), AR(846), MYO5B(857), DRD4(873), CCKAR(991),                                                                                                                                                                                                                                                                                                                                      |

|        |          |                                                                                                                                                                                                                                                                                                                                                                                                                                                                                                                                                                                                                                                                                                                                                                                                                                                                                                                                                                                                                                                                                                                                                                                                                                                                                                |
|--------|----------|------------------------------------------------------------------------------------------------------------------------------------------------------------------------------------------------------------------------------------------------------------------------------------------------------------------------------------------------------------------------------------------------------------------------------------------------------------------------------------------------------------------------------------------------------------------------------------------------------------------------------------------------------------------------------------------------------------------------------------------------------------------------------------------------------------------------------------------------------------------------------------------------------------------------------------------------------------------------------------------------------------------------------------------------------------------------------------------------------------------------------------------------------------------------------------------------------------------------------------------------------------------------------------------------|
|        |          | FGFR1(1018), ROS1(1048), SLC6A4(1058), IL1B(1076), NGFR(1104), ANK3(1152), ADCY9(1170), PENK(1176), LEPR(1205), PSMD9(1239), NOS1(1248), FGFR3(1278), CHRFAM7A(1417), LRP1(1493), FGFR4(1523), AKT1(1544), PDE10A(1570), POMC(1580), NPY(1591), SLC6A2(1599), FZD3(1679), APOE(1857)                                                                                                                                                                                                                                                                                                                                                                                                                                                                                                                                                                                                                                                                                                                                                                                                                                                                                                                                                                                                           |
| GRIK4  | 2.52E-22 | GRIK5(1), GRIK3(2), GRIK2(3), GRIK1(4), GRIA4(5), GRIA3(6), GRIA1(7), GRIA2(8), GRIN1(11), GRIN2B(13), GRIN2D(14), GRIN2C(15), GRIN2A(16), GRIN3A(26), GRM7(27), HTR3A(49), GABRA5(66), HTR5A(71), DTNBP1(72), GABRA6(79), GABRA3(81), GABBR1(82), GAD1(92), DRD1(112), DAOA(128), ADRA2B(138), HTR1A(143), HTR2A(151), DRD2(175), HTR6(179), CACNA1C(218), DRD3(228), HTR2B(252), HTR7(261), HTR1B(273), ITPR1(275), DRD5(300), HTR3B(317), ADRA2C(318), FGFR2(323), FZD3(331), HTR2C(352), TACR1(367), CHRNA7(373), ADRA1A(388), BDNF(391), TH(395), DISC1(427), GNAL(495), NTRK2(508), GNAS(524), ADRA1B(541), ADORA2A(545), NR3C1(551), CHRM2(583), IL6(624), ESR1(625), P2RX7(631), OPRK1(644), HTR4(647), KCNC2(659), P2RX4(709), PSMB4(739), ADRB1(755), TNF(772), CNR1(790), FGFR1(848), OPRD1(858), ADRA2A(919), CRHR2(928), TAC1(955), NGFR(988), CCKBR(989), AGTR1(991), IL1B(1007), CRHR1(1031), DRD4(1055), MYO5B(1066), ROS1(1091), GPR50(1191), AVPR1B(1207), FGFR3(1212), SLC6A4(1225), PHACTR3(1327), PENK(1336), ESR2(1341), FGFR4(1355), ADCY9(1386), OPRM1(1535), NTRK3(1576), TPH2(1594), SLC6A1(1640), LRP1(1700), AR(1746), AVPR1A(1829), APOE(1882), SLC6A2(1888), PCLO(1916), CREB1(1951)                                                                             |
| GRIN2C | 3.78E-22 | GRIN2D(1), GRIN2A(2), GRIN1(3), GRIN2B(4), GRIN3A(5), GRIA3(7), GRIA4(12), GRIA1(13), GRIA2(15), GRIK1(16), GRIK3(20), GRIK5(24), GRIK4(26), DRD1(27), GABRA6(28), GRIK2(32), GRM7(55), CACNA1C(61), HTR3A(72), GABRA3(77), GABBR1(78), ITPR1(114), GABRA5(127), DRD2(141), ADRA2B(154), ADORA2A(166), HTR3B(169), BDNF(174), TACR1(179), ADRA2C(205), NOS1(213), DRD3(218), CHRM2(234), HTR1A(235), HTR2C(239), HTR2A(240), TH(241), HTR2B(253), GAD1(255), NTRK2(256), DRD5(270), HTR5A(301), CHRNA7(308), ADRA1A(319), KCNC2(327), HTR1B(344), ESR1(351), CREB1(354), ADRA1B(360), ADRB1(367), P2RX7(418), CD3E(419), CRHR1(420), CNR1(432), ADRA2A(438), OPRK1(449), NFKB1(453), NR3C1(471), IL1B(472), P2RX4(485), IL6(486), TNF(489), TAC1(491), NGFR(505), PSMB4(507), AGTR1(511), OPRD1(524), HTR7(526), CRHR2(529), HTR6(544), CCKBR(606), AKT1(617), ESR2(650), FGFR2(653), PENK(681), GNAS(730), OPRM1(808), SLC6A1(834), HTR4(856), ADCY9(941), AVPR1B(955), PDE10A(964), GNAL(966), FGFR1(983), NTRK3(1017), AVPR1A(1045), GSK3B(1075), PRKCH(1090), LEPR(1156), PSMD9(1161), NPY(1255), LRP1(1285), ROS1(1356), FGFR4(1365), POMC(1388), AR(1390), NOS3(1399), CCKAR(1514), MYO5B(1518), CCND2(1635), FGFR3(1683), DRD4(1742), SLC6A2(1879), PDE1A(1908), ANK3(1928), APOE(1977) |
| NOS1   | 4.10E-22 | NOS3(1), TNF(43), IL6(49), TH(54), AGTR1(62), GSK3B(64), TAC1(75), IL1B(85), GRIN2C(87), AKT1(100), GRIN1(110), LEPR(111), PDE5A(117), GSK3A(118), CACNA1C(131), ADRA2B(136), TACR1(143), DRD1(144), GRIN2D(148), APOE(178), LEP(207), ESR1(213), ADRA1A(215), NFKB1(218), ADRB1(219), ADRA1B(225), POMC(226), GRIA1(246), GRIA3(262), HTR2B(278), ADORA2A(284), ITPR1(295), DRD3(303), DRD2(313), HTR1A(315), ADRA2A(324), CREB1(327), GRIN2A(329), NGFR(338), GRIA4(340), BDNF(345), ADRA2C(361), GAD1(366), HTR1B(378), MMP2(394), GRIN2B(396), PENK(406), CHRM2(408), GRM7(436), CRHR1(439), PDE2A(460), ESR2(467), GABBR1(483), NPY(489), HTR2A(508), GNAS(567), NR3C1(605), HTR3A(628), GABRA6(669), ABCB1(678), ADCY9(697), CCKBR(709),                                                                                                                                                                                                                                                                                                                                                                                                                                                                                                                                                 |

|        |          |                                                                                                                                                                                                                                                                                                                                                                                                                                                                                                                                                                                                                                                                                                                                                                                                                                                                                                                                                                                                                                                                                                                                                                                                                                                                                                                                                             |
|--------|----------|-------------------------------------------------------------------------------------------------------------------------------------------------------------------------------------------------------------------------------------------------------------------------------------------------------------------------------------------------------------------------------------------------------------------------------------------------------------------------------------------------------------------------------------------------------------------------------------------------------------------------------------------------------------------------------------------------------------------------------------------------------------------------------------------------------------------------------------------------------------------------------------------------------------------------------------------------------------------------------------------------------------------------------------------------------------------------------------------------------------------------------------------------------------------------------------------------------------------------------------------------------------------------------------------------------------------------------------------------------------|
|        |          | AVPR1A(740), CRHR2(757), ACE(768), HTR2C(808), SLC6A4(839), FGFR2(847), SLC6A2(851), CCKAR(857), GRIN3A(888), CHRNA7(976), CNR1(990), GRIA2(1007), P2RX7(1024), GABRA3(1030), GRIK3(1043), PLA2G4A(1075), AR(1098), PDE1A(1111), SERPINA3(1166), NTRK2(1192), OPRM1(1206), CCL2(1266), DRD5(1271), CCND2(1308), ROS1(1326), CAMKK2(1338), FGFR1(1345), HTR7(1453), STAT3(1489), OPRK1(1492), PLA2G2A(1506), SLC6A1(1521), NTRK3(1540), ANK3(1546), SLC6A3(1568), MAOA(1627), AVPR1B(1669), CCK(1693), DDC(1695), PRKCH(1696), GABRA5(1710), CTLA4(1736), PDE11A(1743), HTR5A(1778), PDE10A(1786), OPRD1(1836), KCNC2(1867), P2RX4(1872), PSMD9(1948), FGFR3(1982), GNB3(1994)                                                                                                                                                                                                                                                                                                                                                                                                                                                                                                                                                                                                                                                                               |
| GRIN2A | 4.14E-22 | GRIN2B(1), GRIN2D(2), GRIN2C(3), GRIN1(4), GRIN3A(5), GRIA3(10), GRIA1(11), GRIA4(13), GRIA2(16), GRIK1(23), GRIK3(24), GRIK4(29), GRIK5(30), GRIK2(32), DRD1(35), GABRA6(48), GRM7(58), GABRA5(64), HTR3A(66), CACNA1C(68), GABRA3(70), GABBR1(87), DRD2(125), ITPR1(130), ADORA2A(132), HTR2A(155), TACR1(158), ADRA2B(166), HTR3B(170), HTR1A(172), BDNF(174), DRD3(176), HTR1B(190), ADRA2A(198), DRD5(214), NTRK2(222), CHRNA7(236), ADRA2C(251), CREB1(252), CHRM2(270), HTR2C(279), CNR1(305), ADRB1(313), HTR5A(315), HTR2B(325), ADRA1A(326), TH(329), ADRA1B(342), AGTR1(355), HTR6(374), GAD1(376), IL6(382), OPRD1(405), ESR1(410), OPRK1(416), NOS1(425), PSMB4(427), NR3C1(432), P2RX4(445), OPRM1(458), CCKBR(460), TAC1(472), P2RX7(481), TNF(501), CRHR1(502), HTR7(504), IL1B(512), KCNC2(521), CD3E(539), GNAS(571), NGFR(608), CRHR2(628), AKT1(658), FGFR2(684), HTR4(690), SLC6A1(734), LEPR(802), PENK(804), ESR2(838), DRD4(891), NFKB1(909), LRP1(943), GSK3B(974), ROS1(976), AVPR1B(981), FGFR1(992), AVPR1A(995), APOE(1003), GNAL(1040), AR(1065), CCKAR(1078), SLC6A2(1175), PSMD9(1192), POMC(1287), NPY(1352), SLC6A3(1357), ADCY9(1420), SLC6A4(1449), MYO5B(1472), NTRK3(1493), FGFR4(1499), NOS3(1541), FGFR3(1579), DTNBP1(1586), CCND2(1700), PRKCH(1749), PDE10A(1753), ANK3(1829), GNB3(1920), FZD3(1947), LEP(1961) |
| CYP2C9 | 7.01E-22 | ABCB1(35), IL6(53), ADRA2B(65), GNB3(66), MTHFR(94), ACE(98), TNF(101), SLC6A4(104), APOE(117), HTR2A(121), IL1B(122), AGTR1(172), ADRB1(182), SERPINA3(193), NOS3(194), CTLA4(205), ADRA2C(234), GNAS(254), ESR1(256), DRD2(314), DTNBP1(339), TH(344), TPH2(359), DRD4(362), HTR2C(409), DRD3(410), LEPR(427), NR3C1(471), TPH1(494), MAOA(497), COMT(513), HTR6(532), HTR1A(537), AR(577), LEP(597), CCL2(618), ADRA2A(619), TAC1(620), ADRA1A(621), MMP2(723), DRD1(787), POMC(826), HTR1B(878), ESR2(883), CACNA1C(896), SLC6A2(901), UGT2A1(906), DAOA(923), TACR1(932), GPR50(1009), PENK(1016), GYPA(1037), SLC6A3(1044), GRIK3(1062), ADCY9(1097), FGFR2(1112), NOS1(1150), CCKAR(1157), HTR3A(1194), PDE11A(1368), ITPR1(1378), ADRA1B(1389), CCKBR(1398), PDE1A(1438), GABRA6(1555), GABRA3(1610), WFS1(1613), ACSL4(1621), HTR2B(1659), HTR5A(1776), AKT1(1799), FGFR4(1801), PSMB4(1828), GRIA4(1902), PLA2G2A(1979)                                                                                                                                                                                                                                                                                                                                                                                                                           |
| GRIK1  | 7.65E-22 | GRIK5(1), GRIK2(2), GRIK3(3), GRIK4(4), GRIA4(5), GRIA3(6), GRIA1(7), GRIA2(8), GRIN1(13), GRIN2C(15), GRIN2D(16), GRM7(18), GRIN2B(19), GRIN2A(21), GRIN3A(31), HTR3A(40), GABBR1(43), GABRA3(60), GABRA5(63), GABRA6(67), DRD1(79), CACNA1C(120), TACR1(133), ADRA2B(135), HTR3B(144), HTR1A(150), GAD1(152), DRD2(155), HTR1B(159), ITPR1(161), HTR2A(166), ADRA2C(180), ADORA2A(185), HTR5A(191), HTR2C(193), HTR2B(204), CHRM2(214), HTR7(235), DRD5(243), DRD3(245), P2RX4(248), CHRNA7(257), HTR6(260), ADRA1A(267),                                                                                                                                                                                                                                                                                                                                                                                                                                                                                                                                                                                                                                                                                                                                                                                                                                 |

|        |          |                                                                                                                                                                                                                                                                                                                                                                                                                                                                                                                                                                                                                                                                                                                                                                                                                                                                                                                                                                                                                                                                                                                                                                                                                               |
|--------|----------|-------------------------------------------------------------------------------------------------------------------------------------------------------------------------------------------------------------------------------------------------------------------------------------------------------------------------------------------------------------------------------------------------------------------------------------------------------------------------------------------------------------------------------------------------------------------------------------------------------------------------------------------------------------------------------------------------------------------------------------------------------------------------------------------------------------------------------------------------------------------------------------------------------------------------------------------------------------------------------------------------------------------------------------------------------------------------------------------------------------------------------------------------------------------------------------------------------------------------------|
|        |          | P2RX7(272), CNR1(284), NTRK2(289), KCNC2(311), BDNF(317), PCLO(324), HTR4(334), ADRB1(337), ADRA1B(338), ADRA2A(361), SLC6A1(368), TAC1(380), OPRD1(394), OPRK1(405), CRHR2(438), TH(456), ESR1(462), AGTR1(533), FGFR2(539), GNAS(544), CCKBR(571), OPRM1(581), CRHR1(586), NR3C1(595), IL6(601), DTNBP1(681), NGFR(706), AVPR1A(721), PSMB4(747), ESR2(782), AVPR1B(800), MYO5B(825), TNF(849), CREB1(853), GNAL(869), CCKAR(1060), FZD3(1121), DRD4(1175), PENK(1177), IL1B(1198), FGFR1(1274), NOS1(1318), ANK3(1336), ROS1(1341), NTRK3(1401), PSMD9(1412), SLC6A4(1532), AR(1542), SLC6A2(1584), CHRFAM7A(1623), FGFR3(1646), NPY(1674), PHACTR3(1697), LEPR(1740), SYN3(1816), ADCY9(1948), LRP1(1992), FGFR4(1995)                                                                                                                                                                                                                                                                                                                                                                                                                                                                                                    |
| HP     | 1.05E-21 | IL6(7), TNF(13), IL1B(17), SERPINA3(20), APOE(34), ADRA2B(36), GNB3(65), AGTR1(101), ESR1(115), ACE(120), CCL2(127), GNAS(157), MTHFR(167), ADRB1(171), LEPR(181), ABCB1(186), LEP(192), NOS3(223), HTR2A(256), MMP2(287), CTLA4(336), SLC6A4(338), ADRA1A(345), HTR6(370), CYP2C9(379), ESR2(413), LRP1(444), POMC(494), ADRA2A(507), NR3C1(591), ADRA2C(626), TAC1(765), NFKB1(766), PSMB4(768), ADRA1B(782), DRD2(845), CACNA1C(847), TH(896), PLA2G2A(916), FGFR2(1010), AR(1012), PSMD9(1022), CRHR1(1153), HTR2B(1167), GYP A(1175), TACR1(1233), DTNBP1(1306), PENK(1324), GABRA6(1338), AKT1(1342), GRIK3(1394), HTR1A(1437), ITPR1(1462), SLC6A2(1480), GABRA3(1567), DRD3(1632), WFS1(1743), MAOA(1772), DRD1(1822), HTR2C(1823), NOS1(1975), DRD4(1995)                                                                                                                                                                                                                                                                                                                                                                                                                                                            |
| GABRA5 | 9.82E-21 | GABRA3(5), GABRA6(11), GABBR1(14), SLC6A1(19), GAD1(31), GRIA1(41), GRIA3(52), GRIN2A(53), GRIN1(56), GRIN2D(58), HTR3A(62), GRIK3(63), GRIA4(78), GRIA2(79), GRIN2B(80), GRIN2C(86), HTR1A(100), GRIK4(110), GRIK1(121), ADRA2B(122), CACNA1C(125), HTR1B(129), ADRA2C(134), GRIK5(136), GRM7(137), DRD1(138), CHRNA7(141), GNAS(152), GRIN3A(165), HTR5A(168), GRIK2(176), ADRA1B(184), DRD2(187), HTR3B(195), ADRA2A(215), HTR2A(225), ADRA1A(237), DRD5(275), HTR2C(279), DRD3(305), TNF(311), KCNC2(323), BDNF(326), GNAL(328), ITPR1(336), ADRB1(354), TACR1(365), CNR1(373), ESR1(388), HTR2B(396), CHRM2(412), ADORA2A(421), TH(434), PSMB4(463), HTR6(467), HTR7(496), CCKBR(545), NTRK2(572), NR3C1(624), FGFR2(653), AGTR1(664), ESR2(669), HTR4(721), IL6(728), OPRD1(739), PENK(766), OPRK1(787), IL1B(805), GNB3(818), CRHR2(846), CRHR1(852), OPRM1(856), POMC(884), CHRFAM7A(899), CREB1(903), TAC1(913), P2RX4(926), SLC6A4(985), P2RX7(994), LEPR(1026), DRD4(1135), ADCY9(1298), PHACTR3(1314), AVPR1B(1435), NGFR(1450), FZD3(1508), PSMD9(1531), SERPINA3(1548), AR(1565), NOS1(1604), FGFR1(1656), ABCB1(1688), SLC6A2(1705), APOE(1724), NPY(1770), CD3E(1804), AVPR1A(1853), FGFR3(1910), CCKAR(1921) |
| GRIN2B | 2.17E-20 | GRIN2A(1), GRIN2D(2), GRIN2C(3), GRIN1(4), GRIN3A(5), GRIA3(10), GRIA1(11), GRIA4(13), GRIA2(15), GRIK3(20), GRIK1(22), GRIK4(29), GRIK5(30), GRIK2(35), DRD1(41), GRM7(49), GABRA6(67), CACNA1C(77), GABBR1(80), HTR3A(81), GABRA3(92), GABRA5(98), ITPR1(123), ADRA2B(128), DRD2(152), HTR2A(166), BDNF(178), HTR1A(179), ADORA2A(197), TACR1(205), HTR3B(212), HTR2B(215), DRD3(218), NTRK2(229), CREB1(234), CHRNA7(263), HTR1B(275), ADRA2C(292), TH(303), ADRB1(307), GAD1(317), CHRM2(319), ADRA1A(326), HTR2C(337), HTR5A(350), HTR6(361), DRD5(366), CNR1(384), ESR1(404), AGTR1(407), ADRA2A(420), TNF(459), IL1B(464), NOS1(466), P2RX7(468), ADRA1B(469), AKT1(473), IL6(478), NR3C1(485), P2RX4(500), GNAS(505), KCNC2(508), TAC1(518), HTR7(520), CRHR1(523), PSMB4(577), NGFR(583), OPRD1(587), GSK3B(596),                                                                                                                                                                                                                                                                                                                                                                                                    |

|        |          |                                                                                                                                                                                                                                                                                                                                                                                                                                                                                                                                                                                                                                                                                                                                                                                                                                                                                                                                                                                                                                                                                                                                                      |
|--------|----------|------------------------------------------------------------------------------------------------------------------------------------------------------------------------------------------------------------------------------------------------------------------------------------------------------------------------------------------------------------------------------------------------------------------------------------------------------------------------------------------------------------------------------------------------------------------------------------------------------------------------------------------------------------------------------------------------------------------------------------------------------------------------------------------------------------------------------------------------------------------------------------------------------------------------------------------------------------------------------------------------------------------------------------------------------------------------------------------------------------------------------------------------------|
|        |          | OPRK1(602), CRHR2(611), CCKBR(621), HTR4(652), FGFR2(662), SLC6A1(726), DTNBP1(727), OPRM1(779), ESR2(823), GNAL(826), CD3E(890), DRD4(926), LRP1(978), FGFR1(980), LEPR(988), PENK(1006), ROS1(1028), AVPR1A(1033), NFKB1(1047), AVPR1B(1072), CCKAR(1133), APOE(1150), DAOA(1160), AR(1200), SLC6A2(1206), SLC6A4(1261), CAMKK2(1291), NPY(1293), ADCY9(1294), GNB3(1339), PSMD9(1366), NTRK3(1370), ANK3(1404), POMC(1415), PDE10A(1601), MYO5B(1603), FGFR4(1610), FZD3(1632), FGFR3(1641), SYN3(1705), PCLO(1744), NOS3(1747), PRKCH(1766), ABCB1(1834), CHRFAM7A(1942), PDE1A(1977)                                                                                                                                                                                                                                                                                                                                                                                                                                                                                                                                                            |
| IL6    | 4.25E-20 | IL1B(4), TNF(36), STAT3(91), NFKB1(93), CCL2(117), LEP(158), LEPR(185), APOE(209), AGTR1(215), TAC1(260), ESR1(263), AKT1(284), TACR1(293), CTLA4(303), NOS3(309), POMC(312), ADRA2B(319), MMP2(321), TBX21(336), ADORA2A(348), ABCB1(354), SERPINA3(362), ADRB1(401), NR3C1(430), P2RX7(491), HTR2A(533), ESR2(570), PLA2G2A(595), ADRA2A(613), PENK(616), ADRA1B(623), HTR6(633), TH(641), GNAS(644), ADRA1A(651), CREB1(689), LBP(702), GNB3(705), ACE(714), DRD2(727), GABRA6(779), DRD1(792), NOS1(817), GSK3B(858), CRHR1(863), ADRA2C(886), FGFR2(898), AR(914), HTR1A(927), NPY(990), DRD3(999), CCKBR(1034), CCND2(1037), SLC6A4(1082), PRKCH(1096), HTR1B(1109), ITPR1(1118), CRHR2(1147), M6PR(1159), PLA2G4A(1166), CACNA1C(1202), FGFR4(1219), MTHFR(1239), HTR2C(1261), FGFR1(1317), CHRM2(1341), CD3E(1342), CNTF(1349), BDNF(1371), CYP2C9(1404), FGFR3(1420), NGFR(1458), LRP1(1589), HTR2B(1602), CCKAR(1637), SLC6A2(1743), PSMD9(1765), GSK3A(1872), HTR3A(1936), CNR1(1989)                                                                                                                                                     |
| GRIN3A | 7.13E-20 | GRIN1(2), GRIN2C(3), GRIN2D(4), GRIN2A(5), GRIN2B(6), GRIA3(9), GRIA4(12), GRIA1(23), GRIK3(32), GRIA2(33), GRIK4(36), GRIK5(40), GRIK1(42), GRM7(61), GRIK2(66), DRD1(76), PSMB4(83), CACNA1C(85), HTR3A(104), GABBR1(152), GABRA6(157), GABRA3(164), PSMD9(197), ITPR1(198), GABRA5(201), HTR3B(227), HTR1A(293), ADORA2A(325), ADRA1A(336), ADRA2B(356), TACR1(370), CHRNA7(378), HTR5A(380), DRD2(383), HTR2A(441), BDNF(505), DRD3(528), TNF(547), GAD1(600), NR3C1(605), TH(608), IL1B(649), ADRA1B(652), P2RX7(656), CHRM2(681), HTR7(701), HTR2B(714), HTR2C(720), IL6(735), DRD5(736), ADRB1(737), NTRK2(753), ADRA2C(757), OPRK1(777), HTR6(786), CREB1(793), AGTR1(800), P2RX4(802), HTR1B(806), CRHR1(829), NFKB1(837), NOS1(840), CNR1(849), TAC1(856), ADRA2A(910), ADCY9(916), ESR1(951), GNAS(953), OPRD1(972), CRHR2(998), CCKBR(1070), LRP1(1072), HTR4(1076), NGFR(1127), PHACTR3(1128), AKT1(1267), AVPR1A(1293), PDE1A(1297), PENK(1321), MYO5B(1339), SLC6A1(1351), KCNC2(1379), GNAL(1389), FGFR2(1406), PRKCH(1476), OPRM1(1555), AVPR1B(1672), CCL2(1692), GSK3B(1773), PDE10A(1778), ESR2(1794), FGFR1(1810), SLC6A2(1942) |
| DAOA   | 1.09E-19 | DTNBP1(1), DISC1(5), FZD3(17), SYN3(23), CHRFAM7A(25), COMT(29), GPR50(31), HTR2A(36), TPH2(43), DRD4(44), SLC6A4(69), GRIK3(76), HTR6(77), DRD3(78), GRIK4(82), GNB3(115), DRD2(122), TPH1(128), MTHFR(135), CTLA4(140), MAOA(166), WFS1(173), ABCB1(177), SLC6A3(181), ACE(198), GAD1(216), GRIN1(238), GMIP(241), GNAL(243), TNF(249), GRIN2B(253), APOE(260), ADRA2B(307), IL1B(308), GNAS(311), IL6(314), GRIA4(315), HTR5A(317), CYP2C9(330), HTR1B(376), DRD1(392), HTR2C(398), SLC6A2(439), HTR1A(441), ESR1(443), ADRA2C(484), NOS3(488), BDNF(499), CHRNA7(511), AGTR1(515), SERPINA3(540), GRIN2A(591), GABRA3(621), DDC(696), DRD5(718), ADRB1(744), PER3(816), CCKAR(877), ADRA2A(909), ADCY9(992), HTR4(1002), GRIA3(1052), CCL2(1070), AR(1247), GRIK2(1252),                                                                                                                                                                                                                                                                                                                                                                         |



|        |          |                                                                                                                                                                                                                                                                                                                                                                                                                                                                                                                                                                                                                                                                                                                                                                                                                                                                                                                                                                                                                                                                                                                                                                                                                                         |
|--------|----------|-----------------------------------------------------------------------------------------------------------------------------------------------------------------------------------------------------------------------------------------------------------------------------------------------------------------------------------------------------------------------------------------------------------------------------------------------------------------------------------------------------------------------------------------------------------------------------------------------------------------------------------------------------------------------------------------------------------------------------------------------------------------------------------------------------------------------------------------------------------------------------------------------------------------------------------------------------------------------------------------------------------------------------------------------------------------------------------------------------------------------------------------------------------------------------------------------------------------------------------------|
|        |          | GABBR1(1276), GABRA5(1360), TH(1404), GRIN2D(1439), POMC(1472), NR3C1(1531), GSK3B(1575), TFCP2(1645), MAOB(1772), FGFR2(1829), LEPR(1833), ESR2(1865), HTR7(1913), NOS1(1985)                                                                                                                                                                                                                                                                                                                                                                                                                                                                                                                                                                                                                                                                                                                                                                                                                                                                                                                                                                                                                                                          |
| GABRA6 | 1.73E-19 | GABRA3(8), GABRA5(12), GABBR1(15), SLC6A1(24), GRIN2D(36), GRIN2C(46), GRIA4(55), GRIA3(59), GAD1(62), GRIK3(71), GRIN2A(75), GRIA1(80), HTR3A(85), GRIN1(86), CACNA1C(95), GRIN2B(96), ADRA2B(105), GRIK5(128), GRIA2(140), IL6(148), HTR1A(169), ADRA1B(172), ADRA2C(175), ADRA1A(179), DRD2(186), DRD1(189), TNF(191), GNAS(197), ITPR1(207), CHRNA7(215), HTR3B(222), ADRA2A(225), GRIK1(234), GRIN3A(241), ADRB1(245), GRIK4(248), KCNC2(261), HTR5A(263), HTR1B(265), GRIK2(268), HTR2A(285), GRM7(288), DRD3(300), OPRD1(322), ESR1(332), PSMB4(335), TACR1(366), HTR6(370), GNB3(423), GNAL(437), HTR2C(444), OPRK1(462), ADORA2A(464), TH(487), NR3C1(504), AGTR1(510), CHRM2(522), HTR2B(535), CCKBR(546), CNR1(568), DRD5(569), CRHR2(581), CRHR1(582), POMC(586), ESR2(606), IL1B(617), TAC1(697), HTR7(721), FGFR2(735), OPRM1(743), BDNF(783), SLC6A4(818), PENK(862), P2RX7(915), LEPR(939), CD3E(1009), P2RX4(1019), HTR4(1036), AVPR1B(1103), SERPINA3(1159), NGFR(1259), CCKAR(1272), NOS1(1292), FGFR1(1359), CREB1(1361), NTRK2(1405), SLC6A2(1415), NPY(1472), ADCY9(1502), AVPR1A(1530), AR(1559), LRP1(1576), PSMD9(1577), ANK3(1680), DRD4(1694), ROS1(1700), NFKB1(1714), APOE(1770), FGFR4(1813), FGFR3(1934) |
| GRIK5  | 2.66E-19 | GRIK2(1), GRIK1(2), GRIK4(3), GRIK3(4), GRIA4(5), GRIA3(6), GRIA1(7), GRIA2(8), GRIN2D(12), GRIN1(13), GRIN2C(14), GRM7(18), GRIN2A(20), GRIN2B(22), GRIN3A(29), HTR3A(47), GABRA6(48), GABBR1(51), HTR3B(56), GABRA3(61), GABRA5(86), CACNA1C(102), DRD1(121), ITPR1(156), ADRA2B(179), DRD2(200), HTR5A(203), GAD1(210), CHRNA7(211), P2RX7(222), P2RX4(224), HTR1A(227), CHRM2(235), TACR1(245), ESR1(262), HTR1B(276), ADORA2A(287), HTR2A(291), HTR7(316), DRD3(320), ADRA1A(322), HTR6(324), KCNC2(333), ADRA2C(337), HTR2C(339), ADRB1(345), HTR2B(346), CRHR2(367), OPRD1(375), CRHR1(395), CNR1(397), ESR2(398), DRD5(400), PCLO(416), NTRK2(425), AVPR1B(439), NR3C1(465), OPRK1(474), SLC6A1(512), GNAS(519), ADRA2A(528), FGFR2(542), PSMB4(547), HTR4(550), CCKBR(569), BDNF(571), ADRA1B(585), MYO5B(653), AGTR1(667), TH(725), TAC1(746), LRP1(804), OPRM1(805), AVPR1A(816), NGFR(861), GNAL(867), FGFR1(873), ANK3(892), IL6(1045), DTNBP1(1092), TNF(1095), CCKAR(1196), AR(1282), ROS1(1421), LEPR(1436), NPY(1437), FGFR4(1440), CREB1(1461), FZD3(1466), FGFR3(1492), NOS1(1519), PSMD9(1527), IL1B(1544), NTRK3(1587), ADCY9(1660), SLC6A2(1685), PENK(1752), POMC(1761), AKT1(1827), DRD4(1897)                  |
| GRIA4  | 4.40E-19 | GRIA3(1), GRIA1(2), GRIA2(3), GRIK3(5), GRIK4(6), GRIK1(7), GRIK2(8), GRIK5(9), GRM7(16), GRIN1(19), GRIN2D(20), GRIN2C(22), GRIN2A(25), GRIN2B(26), GRIN3A(32), HTR3A(41), GABRA6(55), CACNA1C(56), DRD1(57), GABRA3(82), ITPR1(91), GABBR1(92), ADRA2B(124), DRD2(133), GABRA5(159), HTR5A(169), HTR1A(172), DRD3(173), HTR3B(183), GAD1(190), ADRA1A(195), HTR2A(198), HTR6(205), HTR7(244), HTR2C(253), ADRA2C(265), DRD5(270), ADORA2A(276), TACR1(302), HTR2B(303), ADRB1(305), CHRNA7(318), HTR1B(332), ADRA1B(335), P2RX4(338), GNAS(369), KCNC2(390), P2RX7(406), CHRM2(417), TH(419), HTR4(426), OPRK1(434), ESR1(453), NR3C1(508), ADRA2A(509), AGTR1(543), OPRD1(552), FGFR2(564), TNF(573), CNR1(609), MYO5B(614), BDNF(629), NTRK2(660),                                                                                                                                                                                                                                                                                                                                                                                                                                                                                  |

|       |          |                                                                                                                                                                                                                                                                                                                                                                                                                                                                                                                                                                                                                                                                                                                                                                                                                                                                                                                                                                                                                                                                                                                                                                                                                                                                                                                     |
|-------|----------|---------------------------------------------------------------------------------------------------------------------------------------------------------------------------------------------------------------------------------------------------------------------------------------------------------------------------------------------------------------------------------------------------------------------------------------------------------------------------------------------------------------------------------------------------------------------------------------------------------------------------------------------------------------------------------------------------------------------------------------------------------------------------------------------------------------------------------------------------------------------------------------------------------------------------------------------------------------------------------------------------------------------------------------------------------------------------------------------------------------------------------------------------------------------------------------------------------------------------------------------------------------------------------------------------------------------|
|       |          | CCKBR(661), PSMB4(749), ANK3(758), GNAL(771), DTNBP1(789), CRHR1(862), ADCY9(883), TAC1(888), IL6(890), FZD3(1011), SLC6A1(1014), ESR2(1042), CRHR2(1078), FGFR4(1085), OPRM1(1104), PENK(1116), FGFR1(1132), AVPR1B(1168), IL1B(1188), DRD4(1211), NOS1(1230), CREB1(1255), ROS1(1305), AR(1319), AVPR1A(1336), NGFR(1423), LRP1(1473), CCKAR(1561), LEPR(1569), FGFR3(1641), PSMD9(1689), CHRFAM7A(1876), SLC6A2(1899), SLC6A4(1939), AKT1(1991)                                                                                                                                                                                                                                                                                                                                                                                                                                                                                                                                                                                                                                                                                                                                                                                                                                                                  |
| P2RX4 | 5.34E-19 | P2RX7(5), CACNA1C(12), HTR3A(19), GRIA3(40), ITPR1(42), GRIA4(48), GRIA1(79), GRIN2D(82), ADRA1A(88), GRIN1(110), ADRA2B(111), ADRB1(112), TACR1(113), GRIN2C(122), ADORA2A(123), GRM7(124), GRIA2(126), GRIK3(133), GABBR1(137), DRD1(157), GRIN2A(161), AGTR1(164), CHRM2(168), HTR3B(191), GRIN2B(196), HTR2B(210), GRIK5(221), GABRA6(222), ADRA1B(225), GRIK1(232), GABRA3(236), HTR1A(237), IL6(249), GRIK2(254), ADRA2C(258), CHRNA7(270), KCNC2(272), ADRA2A(286), HTR5A(289), DRD2(290), HTR2A(293), TNF(306), TAC1(322), HTR2C(334), GRIN3A(336), CRHR2(350), HTR7(363), GRIK4(371), CRHR1(384), CCKBR(410), DRD3(411), GABRA5(427), HTR4(429), IL1B(438), OPRD1(441), HTR1B(446), ESR1(461), OPRK1(505), NR3C1(512), DRD5(519), FGFR2(520), AVPR1B(528), AVPR1A(532), TH(539), CNR1(632), AKT1(638), HTR6(651), SLC6A1(675), ESR2(687), GNAS(715), NGFR(718), LEPR(729), CCKAR(734), ADCY9(739), FGFR1(741), NOS1(762), NOS3(773), OPRM1(797), ABCB1(891), CREB1(892), ANK3(908), PDE1A(977), FGFR4(1007), NTRK2(1043), MMP2(1052), POMC(1132), NFKB1(1176), PENK(1221), LRP1(1242), NPY(1284), AR(1305), BDNF(1338), FGFR3(1364), M6PR(1449), ROS1(1474), PLA2G4A(1486), GAD1(1553), LEP(1574), NTRK3(1612), PSMD9(1642), PSMB4(1823), GSK3B(1833), CAMKK2(1891), SLC6A2(1908), MYO5B(1939), APOE(1962) |
| GRIA2 | 1.08E-18 | GRIA3(1), GRIA1(2), GRIA4(3), GRIK1(8), GRIK4(9), GRIK3(10), GRIK2(12), GRIK5(13), GRIN1(14), GRIN2A(16), GRIN2B(17), GRIN2C(18), GRIN2D(20), GRM7(25), GRIN3A(36), HTR3A(56), GABBR1(57), CACNA1C(65), GABRA5(71), GABRA6(75), GABRA3(76), DRD1(77), ITPR1(100), HTR1A(152), BDNF(167), DRD2(184), NTRK2(192), HTR3B(195), TACR1(197), GAD1(202), ADORA2A(209), HTR1B(233), HTR2C(239), ADRA2B(240), HTR2A(252), P2RX4(273), CHRNA7(281), CHRM2(300), HTR5A(302), ADRA1A(306), DRD3(307), ADRA2C(309), P2RX7(311), TH(312), CNR1(315), DRD5(347), ADRB1(350), ADRA1B(364), HTR2B(371), ESR1(394), CREB1(409), SLC6A1(418), HTR7(419), NGFR(420), TNF(423), KCNC2(436), ADRA2A(445), NR3C1(446), CCKBR(461), GNAS(474), AGTR1(480), CRHR1(484), HTR4(504), CRHR2(529), TAC1(531), FGFR2(534), OPRD1(543), HTR6(554), IL6(593), OPRK1(611), MYO5B(622), OPRM1(629), NOS1(703), ESR2(706), IL1B(780), PSMB4(791), AKT1(835), PCLO(845), AVPR1B(887), AVPR1A(892), LEPR(964), NTRK3(965), PENK(967), FGFR1(978), GNAL(1002), CCKAR(1075), ROS1(1076), LRP1(1077), AR(1121), NFKB1(1191), NPY(1252), ANK3(1312), FGFR3(1330), PSMD9(1335), GSK3B(1340), POMC(1388), CAMKK2(1422), SLC6A2(1425), FGFR4(1436), ADCY9(1479), APOE(1561), DRD4(1626), SLC6A4(1700), PDE10A(1782)                                            |
| GRIA1 | 1.41E-18 | GRIA3(1), GRIA2(2), GRIA4(3), GRIK3(6), GRIK1(7), GRIK4(8), GRIK2(10), GRIK5(11), GRIN1(14), GRM7(15), GRIN2A(19), GRIN2B(21), GRIN2C(24), GRIN2D(25), GRIN3A(43), DRD1(56), GABBR1(58), GABRA5(69), HTR3A(70), GABRA6(90), GABRA3(106), DRD2(111), CACNA1C(121), ITPR1(122), GAD1(131), HTR1A(146), HTR1B(149), TACR1(186), NTRK2(189), DRD3(198), BDNF(202), DRD5(205), CNR1(221), ADORA2A(248), ADRA2B(249), ADRA2C(252), TH(259), CREB1(269),                                                                                                                                                                                                                                                                                                                                                                                                                                                                                                                                                                                                                                                                                                                                                                                                                                                                   |

|          |          |                                                                                                                                                                                                                                                                                                                                                                                                                                                                                                                                                                                                                                                                                                                                                                                                                                                                                                                                                                                                                                                                                        |
|----------|----------|----------------------------------------------------------------------------------------------------------------------------------------------------------------------------------------------------------------------------------------------------------------------------------------------------------------------------------------------------------------------------------------------------------------------------------------------------------------------------------------------------------------------------------------------------------------------------------------------------------------------------------------------------------------------------------------------------------------------------------------------------------------------------------------------------------------------------------------------------------------------------------------------------------------------------------------------------------------------------------------------------------------------------------------------------------------------------------------|
|          |          | HTR2A(278), CHRNA7(282), CHRM2(285), HTR2C(306), SLC6A1(318), HTR5A(337), HTR3B(340), ADRA1B(342), ADRA1A(344), ADRB1(367), P2RX7(398), MYO5B(415), P2RX4(425), ADRA2A(431), NGFR(455), ESR1(458), KCNC2(473), HTR2B(474), NR3C1(483), TAC1(486), GNAS(487), AGTR1(500), CRHR1(510), CCKBR(523), TNF(524), HTR7(525), OPRM1(541), PCLO(542), FGFR2(555), HTR6(572), NOS1(578), OPRD1(584), HTR4(605), CRHR2(620), OPRK1(622), IL6(657), CAMKK2(705), PENK(724), ESR2(849), ROS1(851), PSMB4(854), IL1B(912), DRD4(916), AVPR1B(961), AKT1(979), FGFR1(994), NTRK3(1000), LEPR(1015), SLC6A3(1021), GNAL(1079), SLC6A2(1104), ANK3(1168), AVPR1A(1191), NPY(1197), LRP1(1222), PSMD9(1251), ADCY9(1256), AR(1281), PDE10A(1302), FGFR3(1347), GSK3B(1350), APOE(1359), CCKAR(1398), POMC(1498), SLC6A4(1529), FGFR4(1542), DTNBP1(1546), SYN3(1575), NFKB1(1689), FZD3(1996)                                                                                                                                                                                                            |
| IL1B     | 2.15E-18 | IL6(3), TNF(36), NFKB1(80), CCL2(108), STAT3(174), MMP2(238), TACR1(269), AGTR1(271), P2RX7(274), ESR1(280), ADRB1(281), AKT1(282), CTLA4(298), PLA2G2A(299), SERPINA3(312), TAC1(325), POMC(326), APOE(331), NOS3(339), LEPR(364), LEP(365), ADRA2B(367), TBX21(386), ADORA2A(400), HTR2A(438), NR3C1(441), ADRA1B(449), ABCB1(484), ADRA1A(490), ESR2(529), PENK(607), CREB1(633), LBP(646), GNB3(658), TH(678), NOS1(707), GNAS(709), GSK3B(726), ADRA2A(740), ACE(754), DRD2(792), HTR1A(808), PLA2G4A(814), DRD1(838), PRKCH(847), ADRA2C(848), SLC6A4(923), CACNA1C(957), FGFR2(961), HTR1B(986), ITPR1(987), CRHR1(1020), CD3E(1137), CCKBR(1148), DRD3(1172), HTR2B(1230), MTHFR(1254), AR(1262), CRHR2(1306), LRP1(1344), FGFR1(1349), PSMD9(1370), CYP2C9(1387), HTR2C(1403), CCND2(1411), BDNF(1429), GRIN2C(1437), GRIN1(1489), NPY(1513), FGFR4(1525), GABRA6(1534), ADCY9(1573), CCKAR(1576), HTR6(1583), GABBR1(1597), GRIA3(1631), FGFR3(1690), CHRM2(1724), HTR3A(1747), GRIA4(1782), GSK3A(1786), NGFR(1840), DTNBP1(1881), GRIN2B(1982)                             |
| CHRFAM7A | 4.70E-18 | CHRNA7(1), DTNBP1(25), DAOA(26), HTR3A(30), DISC1(36), CHRM2(40), HTR2A(65), GRIA4(73), CACNA1C(74), HTR6(81), FZD3(87), ADRA2B(95), GABRA3(97), GRIK3(112), DRD3(115), DRD2(118), GRIN1(138), TNF(141), GABRA5(143), GNAS(149), CREB1(173), GRIA3(177), NFKB1(183), HTR5A(191), DRD1(198), IL6(209), ADRA2C(211), GABRA6(214), DRD4(229), ESR1(241), SYN3(267), ITPR1(273), ADRA1A(311), DRD5(317), HTR1A(323), GABBR1(348), GRIA1(360), HTR2C(381), ADRA2A(384), HTR4(397), ADRB1(417), ADRA1B(430), HTR1B(471), GRIN2B(473), FGFR2(483), GNAL(523), GRM7(551), GRIK4(561), AGTR1(583), HTR7(628), NR3C1(633), GPR50(647), HTR2B(649), GRIN2A(670), AKT1(697), IL1B(729), GRIN3A(758), GRIN2D(798), GRIN2C(823), SLC6A4(866), TH(913), GRIK1(937), GRIK2(947), ADORA2A(971), P2RX7(1045), CCKAR(1062), GNB3(1203), COMT(1220), APOE(1232), SERPINA3(1270), AR(1311), PSMB4(1319), ESR2(1325), TACR1(1352), PSMD9(1375), FGFR3(1378), CCKBR(1472), PHACTR3(1494), CAMKK2(1517), FGFR4(1537), HTR3B(1613), GSK3B(1695), GAD1(1755), FGFR1(1797), P2RX4(1811), GRIA2(1922), ADCY9(1998) |
| CCL2     | 5.17E-18 | IL6(16), TNF(18), IL1B(20), NFKB1(53), APOE(152), AGTR1(154), MMP2(187), SERPINA3(232), AKT1(251), NOS3(281), CTLA4(294), ESR1(295), STAT3(326), LEPR(331), GNB3(348), TAC1(350), ABCB1(353), ADRB1(355), ADRA2B(371), TACR1(441), HTR2A(454), LEP(461), NR3C1(483), ACE(495), GNAS(553), ADORA2A(598), PRKCH(604), ADRA1A(607), ESR2(622), POMC(658), PSMD9(659), P2RX7(747), FGFR2(755), PLA2G2A(855), CREB1(915), MTHFR(939), TH(940),                                                                                                                                                                                                                                                                                                                                                                                                                                                                                                                                                                                                                                              |

|       |          |                                                                                                                                                                                                                                                                                                                                                                                                                                                                                                                                                                                                                                                                                                                                                                                                                                                                                                                                                                                                                                                                                                                       |
|-------|----------|-----------------------------------------------------------------------------------------------------------------------------------------------------------------------------------------------------------------------------------------------------------------------------------------------------------------------------------------------------------------------------------------------------------------------------------------------------------------------------------------------------------------------------------------------------------------------------------------------------------------------------------------------------------------------------------------------------------------------------------------------------------------------------------------------------------------------------------------------------------------------------------------------------------------------------------------------------------------------------------------------------------------------------------------------------------------------------------------------------------------------|
|       |          | GSK3B(968), ITPR1(980), LRP1(1026), SLC6A4(1032), DRD2(1071), PLA2G4A(1078), CRHR1(1099), FGFR1(1114), DRD1(1133), AR(1167), PSMB4(1169), ADRA1B(1171), HTR1A(1207), HTR6(1286), FGFR4(1300), ADRA2A(1361), CACNA1C(1370), DRD3(1375), PENK(1426), CCKBR(1492), NOS1(1497), CYP2C9(1499), ADRA2C(1536), FGFR3(1570), CCND2(1590), TBX21(1619), HTR2C(1680), DUSP6(1817), DTNBP1(1826), ADCY9(1876), CD3E(1890), CCKAR(1967), HTR2B(1977), LBP(1997)                                                                                                                                                                                                                                                                                                                                                                                                                                                                                                                                                                                                                                                                   |
| CRHBP | 1.33E-17 | CRHR1(2), CRHR2(3), POMC(10), AVPR1B(17), NR3C1(42), ESR1(55), IL6(94), ESR2(105), CREB1(118), GNAS(133), TH(142), ADRA2B(146), HTR1A(147), HTR3A(161), DRD2(190), DRD1(216), TNF(229), ADCY9(267), DRD3(282), HTR5A(333), ITPR1(432), NPY(433), PENK(467), GRIA4(468), GRIA3(505), CCKBR(514), AGTR1(529), AR(543), HTR2A(568), ADRA2C(571), HTR2C(602), ADRA1A(609), LEP(614), ADRA1B(647), DRD5(650), LEPR(652), IL1B(674), AVPR1A(712), FGFR2(734), GABBR1(789), GRIN1(826), TAC1(830), TACR1(835), GRIK3(988), ADRB1(1030), HTR2B(1062), HTR1B(1063), GABRA3(1134), FGFR4(1221), ADRA2A(1258), GRIK4(1300), HTR6(1323), GAD1(1372), GABRA6(1415), ABCB1(1432), GRIN3A(1433), ADORA2A(1440), SLC6A4(1449), LRP1(1535), FKBP5(1577), CACNA1C(1582), APOE(1598), PSMB4(1600), TPH2(1658), CHRM2(1761), GRM7(1785), SERPINA3(1853), OPRK1(1911)                                                                                                                                                                                                                                                                      |
| GRIA3 | 1.98E-17 | GRIA4(1), GRIA2(2), GRIA1(3), GRIK3(4), GRIK4(6), GRIK1(7), GRIK5(10), GRIK2(12), GRIN1(14), GRM7(18), GRIN2D(19), GRIN2C(21), GRIN2B(27), GRIN2A(28), GRIN3A(32), HTR3A(49), GABBR1(54), GABRA3(64), GABRA6(77), CACNA1C(78), DRD1(117), GABRA5(131), GAD1(140), ITPR1(151), HTR1A(180), ADRA2B(183), HTR3B(200), TACR1(213), DRD2(234), HTR5A(245), ADRA2C(264), HTR2A(273), HTR1B(293), ADORA2A(298), BDNF(302), HTR2C(304), CHRNA7(306), DRD3(311), ADRA1A(323), HTR2B(329), P2RX7(369), NTRK2(374), P2RX4(381), DRD5(412), TH(418), CHRM2(441), KCNC2(452), HTR6(474), FGFR2(501), PSMB4(506), GNAS(516), ADRB1(519), SLC6A1(526), CNR1(544), ADRA1B(549), HTR7(572), MYO5B(594), ESR1(679), CCKBR(691), TAC1(700), ADRA2A(706), AGTR1(715), HTR4(726), ROS1(759), CRHR2(783), TNF(788), NR3C1(789), OPRD1(800), OPRK1(837), NGFR(853), CRHR1(933), IL6(1053), ANK3(1135), GNAL(1183), OPRM1(1213), PENK(1270), ESR2(1359), NTRK3(1371), AVPR1A(1417), NOS1(1445), CREB1(1457), PCLO(1496), IL1B(1513), FGFR1(1525), AVPR1B(1599), FGFR3(1610), PSMD9(1655), ADCY9(1762), PHACTR3(1837), CCKAR(1890), LEPR(1974) |
| TNF   | 2.21E-17 | IL6(4), IL1B(9), NFKB1(14), CCL2(105), ESR1(152), SERPINA3(173), ADRA2B(174), AKT1(197), MMP2(248), LEPR(257), LEP(262), ADRA1A(271), NOS3(302), AGTR1(315), APOE(327), GNAS(332), ADRA2A(337), STAT3(339), ADRA1B(343), POMC(360), TAC1(371), CTLA4(396), ADRB1(433), ADORA2A(468), ADRA2C(483), TACR1(485), ABCB1(500), NR3C1(536), ESR2(547), LBP(615), CREB1(657), P2RX7(694), PLA2G4A(736), GSK3B(754), TH(805), HTR2A(815), NOS1(834), TBX21(876), PRKCH(883), FGFR2(896), CACNA1C(921), GNB3(944), PLA2G2A(952), ACE(983), DRD2(1040), NGFR(1074), DRD1(1112), CD3E(1122), LRP1(1123), GABRA6(1124), CRHR1(1172), FGFR1(1247), HTR1A(1265), CCND2(1364), ITPR1(1366), AR(1386), PENK(1405), SLC6A4(1407), DRD3(1447), FGFR4(1461), PSMD9(1489), CCKBR(1533), BDNF(1559), FGFR3(1622), HTR2B(1635), DUSP6(1654), GSK3A(1683), CRHR2(1687), GNAL(1771), NPY(1779), PDE2A(1783), GABRA3(1789), HTR2C(1806), GRIA4(1880), HTR1B(1886), GRIA3(1912)                                                                                                                                                                 |
| GNAL  | 6.04E-17 | GNAS(19), DRD1(66), ADCY9(88), ADRA2B(207), ADORA2A(222), DRD2(223),                                                                                                                                                                                                                                                                                                                                                                                                                                                                                                                                                                                                                                                                                                                                                                                                                                                                                                                                                                                                                                                  |

|       |          |                                                                                                                                                                                                                                                                                                                                                                                                                                                                                                                                                                                                                                                                                                                                                                                                                                                                                                                                                                                                                                                                                                                                            |
|-------|----------|--------------------------------------------------------------------------------------------------------------------------------------------------------------------------------------------------------------------------------------------------------------------------------------------------------------------------------------------------------------------------------------------------------------------------------------------------------------------------------------------------------------------------------------------------------------------------------------------------------------------------------------------------------------------------------------------------------------------------------------------------------------------------------------------------------------------------------------------------------------------------------------------------------------------------------------------------------------------------------------------------------------------------------------------------------------------------------------------------------------------------------------------|
|       |          | <p>UGT2A1(288), GNB3(359), HTR5A(368), TNF(376), HTR6(379), DRD5(382), ADRA1A(389), DRD3(392), ADRA2A(396), HTR2A(404), GABRA6(416), ADRA1B(425), GABRA3(434), ADRB1(435), GRIA4(441), HTR1A(451), ADRA2C(453), GRIA3(459), GRIK3(494), TH(514), GABRA5(517), ESR1(555), GABBR1(564), HTR2C(593), PDE10A(624), GAD1(634), CACNA1C(654), HTR2B(694), HTR3A(715), IL6(752), GRIA1(760), GRIN2C(771), ANK3(775), GRIK4(785), GRIN1(791), GRIN2D(805), HTR4(841), SERPINA3(843), GPR50(851), PENK(856), FGFR2(912), FZD3(922), PSMD9(957), GRIN2B(962), CCKBR(998), DTNBP1(1039), HTR1B(1075), GRM7(1179), GRIN2A(1189), PSMB4(1199), AGTR1(1200), HTR7(1203), ESR2(1228), IL1B(1236), DRD4(1260), DAOA(1293), SLC6A3(1307), SLC6A4(1308), TAC1(1361), NR3C1(1365), OPRD1(1381), OPRK1(1407), ITPR1(1414), AVPR1B(1529), TACR1(1535), CRHR1(1540), GRIA2(1565), CHRNA7(1591), CHRM2(1593), GRIN3A(1640), CCKAR(1723), POMC(1725), HTR3B(1735), TPH2(1771), AKT1(1805), CREB1(1808), PHACTR3(1918), SLC6A2(1926), CRHR2(1966)</p>                                                                                                               |
| CTLA4 | 6.58E-17 | <p>IL6(32), TNF(42), IL1B(65), CD3E(74), GNB3(92), TBX21(118), HTR2A(189), ABCB1(190), APOE(224), MTHFR(227), ADRA2B(230), AGTR1(253), CCL2(275), GNAS(285), ACE(289), SLC6A4(310), NOS3(332), ESR1(352), LEPR(353), SERPINA3(355), DTNBP1(362), ADRB1(373), NFKB1(387), AKT1(467), HTR6(532), ITPR1(535), CYP2C9(573), DRD4(596), DAOA(597), NR3C1(607), DRD2(639), DRD3(699), TAC1(707), TACR1(755), LEP(775), FGFR4(810), MMP2(813), PENK(827), GRIK3(840), FGFR2(869), HTR1A(870), DRD1(899), HTR2C(918), GMIP(923), POMC(929), TH(978), AR(993), ADORA2A(1024), P2RX7(1036), TPH2(1040), ADRA2C(1058), ADRA2A(1094), PSMD9(1127), ADRA1A(1150), STAT3(1216), MAOA(1222), FGFR3(1244), ESR2(1264), WFS1(1283), CCND2(1290), GRIA4(1311), CCKAR(1316), GPR50(1357), CCKBR(1358), ADCY9(1477), FZD3(1507), COMT(1512), GSK3B(1582), HTR1B(1609), CREB1(1626), SLC6A3(1637), SLC6A2(1673), FGFR1(1705), GRIA3(1727), CACNA1C(1776), CHRM2(1779), HTR3A(1827), ADRA1B(1855), TPH1(1861), CD47(1871), GABBR1(1881), GAD1(1892), LRP1(1902), NOS1(1948)</p>                                                                                  |
| CNTF  | 1.05E-16 | <p>BDNF(11), IL6(19), STAT3(24), TNF(34), NTRK2(35), NGFR(43), IL1B(51), TH(67), LEP(70), LEPR(75), AKT1(121), FGFR2(141), OLIG2(148), NTRK3(171), TAC1(235), FGFR1(242), OLIG1(274), NFKB1(287), TACR1(303), GRIA3(315), POMC(351), CREB1(361), ESR1(377), ADRA2B(381), CACNA1C(415), APOE(425), GRIN2C(440), FGFR3(449), GAD1(462), NOS1(503), DRD1(510), PENK(524), GSK3B(551), GRIN1(553), ROS1(565), GRIA1(575), AGTR1(578), ITPR1(584), FGFR4(601), DRD2(621), NPY(638), ADORA2A(644), ADRB1(650), GABBR1(670), NR3C1(673), GRIA4(683), CRHR1(712), GABRA6(717), ADRA1A(725), ADRA2C(731), ADRA1B(738), HTR1A(749), HTR2A(760), DRD3(761), CRHR2(762), GNAS(815), HTR3A(834), ADRA2A(923), GRIA2(957), ESR2(984), HTR2C(1002), GRIN2D(1033), ABCB1(1060), P2RX7(1077), CCL2(1090), SERPINA3(1094), HTR1B(1110), MMP2(1159), GRM7(1172), GABRA3(1212), GRIN2B(1235), GRIN2A(1246), GRIK3(1298), CHRM2(1300), CCND2(1355), HTR2B(1362), AR(1377), ADCY9(1416), PRKCH(1428), CNR1(1436), DUSP6(1440), CCKBR(1450), NOS3(1470), LRP1(1592), GNAL(1621), PSMD9(1718), FZD3(1778), CHRNA7(1836), GSK3A(1837), GRIN3A(1860), ANK3(1903)</p> |
| ESR1  | 2.65E-16 | <p>ESR2(1), TCF20(38), TNF(41), AR(49), IL6(67), ADRA2B(78), NR3C1(103), ADRA1A(132), ADRB1(144), IL1B(145), ADRA2A(158), AGTR1(178), AKT1(183), ADRA1B(185), GNAS(207), ADRA2C(221), DRD1(252), SERPINA3(262), LEPR(266),</p>                                                                                                                                                                                                                                                                                                                                                                                                                                                                                                                                                                                                                                                                                                                                                                                                                                                                                                             |

|       |          |                                                                                                                                                                                                                                                                                                                                                                                                                                                                                                                                                                                                                                                                                                                                                                                                                                                                                                                                                                                                                                                                                                                                                                                         |
|-------|----------|-----------------------------------------------------------------------------------------------------------------------------------------------------------------------------------------------------------------------------------------------------------------------------------------------------------------------------------------------------------------------------------------------------------------------------------------------------------------------------------------------------------------------------------------------------------------------------------------------------------------------------------------------------------------------------------------------------------------------------------------------------------------------------------------------------------------------------------------------------------------------------------------------------------------------------------------------------------------------------------------------------------------------------------------------------------------------------------------------------------------------------------------------------------------------------------------|
|       |          | DRD2(272), NFKB1(277), POMC(285), APOE(286), FGFR2(288), TH(307), HTR2A(310), HTR1A(311), NOS3(456), TACR1(458), CREB1(486), CCKBR(488), DRD3(511), CRHR1(527), LEP(531), HTR3A(547), FGFR4(552), ITPR1(555), HTR2C(566), ADORA2A(620), LRP1(670), HTR1B(677), AVPR1B(702), FGFR1(703), MMP2(704), CACNA1C(706), STAT3(725), GRIA4(742), TAC1(747), ABCB1(761), GSK3B(782), GABRA6(790), GRIK3(816), GRIA3(822), HTR2B(852), GABRA3(875), CHRM2(914), GABBR1(915), FGFR3(921), GRIN1(954), CCND2(995), CRHR2(1006), GRIN2C(1050), HTR6(1054), GRIN2D(1093), CCL2(1115), DRD5(1130), PENK(1156), GRIA1(1157), ROS1(1192), P2RX7(1249), PRKCH(1306), NOS1(1316), SLC6A4(1339), OPRD1(1362), AVPR1A(1390), GNB3(1432), CTLA4(1438), CCKAR(1447), NGFR(1483), HTR5A(1498), PSMD9(1580), NPY(1590), CNR1(1705), OPRK1(1712), GRM7(1717), FKBP5(1722), OPRM1(1790), GRIN2B(1797), GRIN2A(1812), HTR7(1846), GNAL(1884), HTR4(1940), GABRA5(1994)                                                                                                                                                                                                                                              |
| ESR2  | 3.38E-16 | ESR1(1), AR(36), ADRB1(60), TCF20(63), TNF(67), IL6(88), ADRA2B(104), ADRA1A(113), NR3C1(126), IL1B(161), ADRA1B(191), AGTR1(203), ADRA2A(205), POMC(224), ADRA2C(229), HTR1A(248), DRD1(277), TH(281), DRD2(305), FGFR2(314), LEPR(315), HTR2A(320), GNAS(324), AKT1(327), HTR3A(356), TACR1(369), CRHR1(410), APOE(426), NFKB1(464), CCKBR(476), HTR2C(486), AVPR1B(490), DRD3(515), HTR1B(518), HTR2B(533), TAC1(537), SERPINA3(558), FGFR4(564), ITPR1(572), ADORA2A(610), NOS3(629), CACNA1C(633), CREB1(634), LEP(681), CRHR2(689), MMP2(693), GABRA6(708), GRIA3(716), GABBR1(752), GRIA4(756), GRIN2D(760), FGFR1(766), GRIK3(771), CHRM2(776), GABRA3(788), PENK(821), GSK3B(834), LRP1(855), GRIN1(888), HTR5A(935), GRIN2C(943), HTR6(988), ABCB1(991), AVPR1A(995), CCND2(1005), FGFR3(1033), STAT3(1072), DRD5(1113), GRIA1(1116), CCL2(1150), NOS1(1159), OPRD1(1205), HTR4(1252), P2RX7(1295), HTR7(1335), NGFR(1398), NPY(1435), OPRK1(1445), PRKCH(1455), GRM7(1460), SLC6A4(1474), PSMD9(1484), CRHBP(1489), CCKAR(1490), ROS1(1518), CNR1(1541), GABRA5(1654), OPRM1(1656), GNB3(1663), ADCY9(1754), WFS1(1793), GRIN2A(1816), GAD1(1817), GRIN2B(1826), FKBP5(1992) |
| TH    | 1.66E-15 | TPH2(9), TPH1(11), DRD1(13), DRD2(15), DRD3(18), DDC(32), SLC6A3(33), SLC6A2(50), DRD5(63), GAD1(166), ROS1(174), PENK(183), FGFR2(185), NGFR(211), CREB1(259), IL6(276), BDNF(277), ADRA2B(286), ADRA2C(325), TNF(332), DRD4(339), NTRK3(352), ADRA1B(362), FGFR1(388), ESR1(396), NTRK2(419), TAC1(422), POMC(438), NOS1(492), HTR1A(529), AKT1(542), ADRA2A(557), ADRA1A(568), GNAS(618), GRIA3(648), GRIA1(652), ADRB1(661), IL1B(674), NR3C1(677), AGTR1(704), GRIN1(705), TACR1(725), HTR1B(735), CACNA1C(750), GSK3B(759), PTPRR(770), FGFR3(798), NPY(807), GRIN2C(825), ITPR1(839), FGFR4(841), ADCY9(853), GRIA4(877), LEPR(880), ESR2(886), ADORA2A(888), CRHR1(923), HTR2A(958), HTR2C(1002), SLC6A4(1008), HTR3A(1064), CCND2(1102), GABBR1(1127), CRHR2(1242), HTR2B(1272), NFKB1(1290), GRIN2D(1311), STAT3(1316), LEP(1356), DUSP6(1389), AR(1406), GABRA3(1413), CCKBR(1431), GABRA6(1496), APOE(1551), GSK3A(1605), GRIN2B(1643), OLIG2(1707), GRM7(1781), GRIN2A(1792), PSMD9(1794), HTR5A(1818), ABCB1(1855), OLIG1(1887), MAOA(1889), NOS3(1931)                                                                                                                   |
| NR3C1 | 6.06E-15 | FKBP5(12), ESR1(44), AR(54), IL6(57), NFKB1(68), TNF(72), CRHR1(124), IL1B(148), ESR2(160), ADRA2B(163), ADRB1(170), CREB1(187), POMC(208), FGFR2(210), HTR1A(238), AGTR1(239), DRD1(260), ADRA1A(276), AKT1(301), HTR2A(306),                                                                                                                                                                                                                                                                                                                                                                                                                                                                                                                                                                                                                                                                                                                                                                                                                                                                                                                                                          |

|       |          |                                                                                                                                                                                                                                                                                                                                                                                                                                                                                                                                                                                                                                                                                                                                                                                                                                                                                                                                                                                                                                                                                                                                                                                                                                                                                         |
|-------|----------|-----------------------------------------------------------------------------------------------------------------------------------------------------------------------------------------------------------------------------------------------------------------------------------------------------------------------------------------------------------------------------------------------------------------------------------------------------------------------------------------------------------------------------------------------------------------------------------------------------------------------------------------------------------------------------------------------------------------------------------------------------------------------------------------------------------------------------------------------------------------------------------------------------------------------------------------------------------------------------------------------------------------------------------------------------------------------------------------------------------------------------------------------------------------------------------------------------------------------------------------------------------------------------------------|
|       |          | GNAS(321), CRHR2(323), LEPR(336), TH(351), HTR3A(364), ITPR1(393), ADRA2C(396), DRD2(413), ADRA1B(425), HTR2C(439), TACR1(447), HTR1B(480), GRM7(484), DRD3(508), AVPR1B(518), CCKBR(552), GRIA4(590), HTR2B(623), ADRA2A(631), PSMD9(643), FGFR1(662), GRIN1(676), STAT3(693), GRIA3(699), ADORA2A(733), LEP(740), ABCB1(760), LRP1(819), PENK(821), HTR6(880), ADCY9(892), GSK3B(912), FGFR4(942), GABRA6(949), FGFR3(963), GRIA1(979), TCF20(1009), GABBR1(1024), OPRK1(1029), HTR5A(1041), TAC1(1078), CD3E(1093), GRIN2C(1141), GRIK3(1212), HTR4(1217), ROS1(1231), OPRD1(1314), CHRM2(1328), CACNA1C(1333), GABRA3(1377), HTR7(1391), PSMB4(1395), APOE(1405), CRHBP(1418), DRD5(1436), AVPR1A(1492), GRIN2D(1546), P2RX7(1550), CCL2(1566), GRIN2A(1573), MMP2(1575), SERPINA3(1614), PRKCH(1656), NGFR(1723), CCKAR(1740), GRIN2B(1831), CCND2(1838), OPRM1(1859), CNR1(1895)                                                                                                                                                                                                                                                                                                                                                                                                  |
| NTRK2 | 1.94E-14 | BDNF(2), NTRK3(3), NGFR(6), GRIA1(32), TH(34), GRIA3(54), GRIN1(56), GRIN2C(74), GRIN2A(96), GRIN2B(100), GRIA2(102), GRIA4(118), GABBR1(126), FGFR2(136), GRIN2D(152), AKT1(164), DRD1(168), FGFR1(169), CREB1(191), CNTF(207), GRM7(220), TACR1(223), GAD1(227), HTR3A(229), GRIK3(236), DRD3(238), ITPR1(239), ROS1(290), TAC1(294), HTR1A(304), DRD2(351), GABRA5(376), FGFR3(398), GSK3B(405), GABRA3(410), GRIK1(420), GRIK4(425), TNF(432), HTR1B(436), GABRA6(483), FGFR4(495), HTR2C(496), IL6(498), GRIN3A(502), ESR1(517), ADORA2A(529), HTR2A(545), CCKBR(566), ADRA2B(575), NR3C1(586), CNR1(642), ADRA2C(655), HTR2B(668), GRIK2(686), ADRA1B(704), CRHR1(717), GRIK5(734), LEPR(737), AGTR1(744), CRHR2(752), ADRA1A(756), NOS1(777), CHRM2(796), DRD5(801), ADRB1(812), CACNA1C(835), PENK(842), PTPRR(843), HTR5A(847), STAT3(876), NFKB1(975), CHRNA7(1034), P2RX7(1042), IL1B(1046), ESR2(1048), GSK3A(1087), POMC(1104), OPRD1(1106), OPRK1(1130), SLC6A1(1159), DUSP6(1170), CAMKK2(1217), FZD3(1224), ADRA2A(1231), LRP1(1246), GNAS(1262), NPY(1362), DNAJB2(1383), AR(1408), APOE(1423), OPRM1(1448), OLIG1(1511), HTR4(1567), HTR6(1570), CCND2(1631), ADCY9(1633), OLIG2(1643), P2RX4(1667), HTR7(1672), SLC6A2(1705), AVPR1B(1810), PRKCH(1840), CCKAR(1875) |
| ABCB1 | 5.04E-14 | IL6(31), TNF(41), TAC1(61), IL1B(84), SLC6A4(102), CYP2C9(106), APOE(145), TACR1(150), ADRA2B(192), GNAS(200), CTLA4(202), AGTR1(218), GNB3(223), SERPINA3(241), ESR1(246), HTR2A(265), NOS3(276), SLC6A2(292), LEPR(313), NR3C1(355), ACE(380), DRD2(386), LEP(399), DTNBP1(405), ADRB1(420), MMP2(449), AKT1(479), NFKB1(483), SLC6A3(504), CCL2(523), MTHFR(567), TH(583), HTR1A(599), DRD3(611), POMC(698), HTR1B(792), DRD1(831), ADRA2C(842), FGFR2(880), AR(881), ADRA2A(897), HTR2C(899), ADRA1B(912), ESR2(931), PENK(942), ADRA1A(948), CCKBR(1062), P2RX7(1099), TPH2(1197), SLC6A1(1253), ITPR1(1266), PSMD9(1288), FKBP5(1352), CACNA1C(1388), GSK3B(1402), CREB1(1482), ADORA2A(1500), MAOA(1518), HTR3A(1630), NOS1(1639), DAOA(1643), PRKCH(1671), FGFR4(1715), HTR6(1726), CCND2(1755), DRD4(1822), GRIA4(1891), LRP1(1937), CHRM2(1949), FGFR3(1972)                                                                                                                                                                                                                                                                                                                                                                                                                  |
| LBP   | 1.37E-13 | TNF(14), IL6(19), IL1B(24), TFCP2(32), NFKB1(78), CCL2(196), APOE(270), ADORA2A(359), STAT3(380), LEP(393), TAC1(408), LEPR(410), AKT1(422), P2RX7(438), TACR1(440), NR3C1(453), SERPINA3(461), AGTR1(465), LRP1(474), ESR1(477), PLA2G4A(490), POMC(532), CREB1(559), PLA2G2A(585), ADRA2B(605), ABCB1(608), ADRB1(612), NOS3(654), MMP2(700), NOS1(719), ITPR1(794), GNAS(827), ADRA1A(861), ADRA2A(936), ADRA1B(1000), CRHR2(1015), FGFR2(1016),                                                                                                                                                                                                                                                                                                                                                                                                                                                                                                                                                                                                                                                                                                                                                                                                                                     |

|          |          |                                                                                                                                                                                                                                                                                                                                                                                                                                                                                                                                                                                                                                                                                                                                                                                                                                                                                                                                      |
|----------|----------|--------------------------------------------------------------------------------------------------------------------------------------------------------------------------------------------------------------------------------------------------------------------------------------------------------------------------------------------------------------------------------------------------------------------------------------------------------------------------------------------------------------------------------------------------------------------------------------------------------------------------------------------------------------------------------------------------------------------------------------------------------------------------------------------------------------------------------------------------------------------------------------------------------------------------------------|
|          |          | CTLA4(1031), CRHR1(1044), PENK(1054), TH(1061), CACNA1C(1125), PSMD9(1144), DRD1(1180), ESR2(1248), HTR3A(1256), DRD2(1359), HTR1A(1422), GSK3B(1440), ADRA2C(1470), TBX21(1559), PSMB4(1574), HTR1B(1578), AR(1685), PRKCH(1691), CHRM2(1717), CCKBR(1773), CCND2(1931), DRD3(1979), FGFR1(1991)                                                                                                                                                                                                                                                                                                                                                                                                                                                                                                                                                                                                                                    |
| PDE5A    | 3.45E-13 | PDE11A(1), PDE9A(2), PDE2A(3), PDE10A(4), PDE1A(17), PDE6C(19), NOS3(52), NOS1(56), AKT1(105), CREB1(109), ADCY9(125), CACNA1C(128), ADRA1A(144), AGTR1(156), TNF(162), ADRB1(167), IL6(169), ADRA2B(170), GNAS(171), ITPR1(213), IL1B(322), HTR5A(345), HTR2B(348), ADORA2A(362), NFKB1(368), TH(380), HTR3A(417), ADRA1B(466), DRD1(500), HTR2A(511), MMP2(521), ESR1(528), NR3C1(558), ADRA2C(567), GSK3B(569), HTR1A(577), PLA2G2A(606), SERPINA3(643), FGFR2(695), ABCB1(709), CRHR1(717), HTR7(762), LEPR(785), GRIA4(834), HTR4(873), TAC1(884), ADRA2A(888), AR(904), HTR6(924), TACR1(983), POMC(1020), HTR2C(1034), GRIN2C(1079), PLA2G4A(1093), GSK3A(1120), DRD2(1138), PRKCH(1174), ESR2(1231), PENK(1299), CHRM2(1371), LEP(1447), DUSP6(1454), PSMB4(1472), CRHR2(1537), GRIA3(1543), CCKBR(1615), FGFR1(1723), PSMD9(1733), APOE(1737), SLC6A4(1753), DRD5(1861), STAT3(1872), DRD3(1908), GABBR1(1910), FGFR4(1971) |
| DISC1    | 7.59E-13 | DTNBP1(4), DAOA(5), FZD3(26), CHRFAM7A(27), SYN3(32), GRIK4(50), COMT(52), HTR2A(59), GPR50(65), TPH2(69), DRD3(71), DRD4(74), HTR6(75), GRIK3(86), SLC6A4(89), WFS1(99), DRD2(105), HTR5A(121), GAD1(143), GABRA3(189), TPH1(208), GRIA4(241), GRIN1(253), GNAS(254), GNAL(292), HTR1A(316), BDNF(354), SLC6A3(382), HTR2C(415), DRD1(417), SLC6A2(470), TNF(477), MAOA(486), CHRNA7(497), GNB3(498), GRIN2B(511), FGFR2(626), IL6(627), APOE(632), HTR1B(658), GRIA3(671), GRIA1(677), ABCB1(692), GABRA5(709), CTLA4(718), ADRA2C(728), TH(749), IL1B(799), ADRA2B(857), ADCY9(971), GSK3B(977), GMIP(982), ESR1(986), GABBR1(1046), GRIN2A(1079), MTHFR(1112), NR3C1(1266), DRD5(1326), PSMD9(1452), FGFR3(1494), PHACTR3(1568), CREB1(1583), DDC(1599), ADRB1(1622), AR(1824), SERPINA3(1921)                                                                                                                                   |
| AR       | 6.93E-12 | ADRB1(7), ADRA1A(13), ADRA1B(15), ADRA2C(27), ADRA2B(31), ADRA2A(42), ESR1(45), ESR2(67), NR3C1(83), IL6(180), FGFR2(191), CCKAR(222), TNF(251), AKT1(257), GNAS(342), AGTR1(389), CCKBR(390), ADORA2A(411), FKBP5(436), TH(465), HTR2A(484), NFKB1(501), IL1B(515), FGFR1(528), DRD1(531), LEPR(550), DRD2(562), CREB1(568), FGFR3(619), HTR3A(634), HTR2C(681), GSK3B(697), FGFR4(700), HTR1A(731), ITPR1(758), TCF20(787), DRD3(811), ROS1(821), TACR1(831), POMC(909), ABCB1(919), GRIA4(939), SERPINA3(985), GRIA3(990), CRHR1(998), STAT3(1024), HTR6(1025), APOE(1051), HTR2B(1095), LEP(1177), CCND2(1194), AVPR1B(1308), PSMD9(1322), MMP2(1327), GRIK3(1348), LRP1(1382), GRIN1(1391), TAC1(1459), CHRM2(1506), GABBR1(1532), GABRA3(1541), PENK(1564), HTR1B(1670), DRD5(1686), HTR5A(1733), GRIA1(1759), NGFR(1795), CACNA1C(1822), CRHR2(1918), GABRA6(1944), NOS3(1970), DRD4(1984), CTLA4(1993), SLC6A4(1995)         |
| SERPINA3 | 1.41E-11 | TNF(15), IL6(47), IL1B(71), ADRA2B(83), APOE(91), ESR1(104), GNAS(123), ADRA1A(163), MMP2(236), GNB3(277), ABCB1(309), ADRA1B(311), LRP1(339), CCL2(344), PSMB4(393), ACE(428), AGTR1(471), ADRA2A(472), ADRA2C(494), ADRB1(534), ESR2(554), HTR2A(578), POMC(611), NFKB1(629), MTHFR(636), CTLA4(654), CACNA1C(720), NOS3(743), AKT1(784), HTR6(805), NR3C1(929), SLC6A4(958), TAC1(973), AR(1046), TH(1082), LEPR(1090), CYP2C9(1092),                                                                                                                                                                                                                                                                                                                                                                                                                                                                                             |



|        |          |                                                                                                                                                                                                                                                                                                                                                                                                                                                                                                                                                                                                                                                                                                                                                                                                                                                                                                                                                                                                                                                                                                                                                                                             |
|--------|----------|---------------------------------------------------------------------------------------------------------------------------------------------------------------------------------------------------------------------------------------------------------------------------------------------------------------------------------------------------------------------------------------------------------------------------------------------------------------------------------------------------------------------------------------------------------------------------------------------------------------------------------------------------------------------------------------------------------------------------------------------------------------------------------------------------------------------------------------------------------------------------------------------------------------------------------------------------------------------------------------------------------------------------------------------------------------------------------------------------------------------------------------------------------------------------------------------|
|        |          | GSK3B(1188), LEP(1222), PSMD9(1224), HP(1322), FGFR2(1350), PENK(1355), GABRA6(1503), PLA2G2A(1537), TACR1(1556), GSK3A(1607), GNAL(1733), GABRA3(1771), GRIK3(1781), TFCP2(1785), FGFR4(1853), DRD2(1876), GRIA4(1897), ITPR1(1900), DTNBP1(1998)                                                                                                                                                                                                                                                                                                                                                                                                                                                                                                                                                                                                                                                                                                                                                                                                                                                                                                                                          |
| NGFR   | 1.50E-11 | NTRK3(7), NTRK2(11), BDNF(16), TH(41), TNF(81), TAC1(93), FGFR2(103), TACR1(123), AKT1(125), IL6(154), FGFR1(166), GRIA3(228), GRIA1(260), NFKB1(284), GRIN1(285), DRD1(308), FGFR3(336), ESR1(362), HTR3A(371), GRIN2C(377), OLIG1(398), ADRA2B(468), DRD2(469), NOS1(481), CNTF(483), ITPR1(488), IL1B(489), GSK3B(491), CREB1(494), ROS1(508), FGFR4(523), AGTR1(532), NR3C1(536), HTR1A(552), LEPR(554), ADORA2A(561), GABBR1(562), GAD1(567), GRIA4(572), GRIN2D(596), ADRA1B(642), GRIA2(672), DRD3(686), GRIN2B(698), ADRB1(702), STAT3(709), GRIN2A(713), HTR2A(716), HTR2B(733), PTPRR(736), ADRA2C(750), OLIG2(775), ESR2(789), LRP1(797), CHRM2(799), HTR1B(822), PENK(843), P2RX7(853), HTR2C(859), CCKBR(860), POMC(873), ADRA1A(877), GABRA6(879), CRHR1(880), CCND2(885), GRM7(922), GRIK3(945), AR(959), CRHR2(988), APOE(989), ADRA2A(1018), DUSP6(1180), HTR5A(1190), GABRA3(1221), CNR1(1241), FZD3(1292), OPRK1(1298), GNAS(1300), NPY(1336), OPRD1(1354), GSK3A(1356), GRIN3A(1439), GRIK4(1444), DRD5(1452), CACNA1C(1477), MMP2(1501), OPRM1(1554), LEP(1581), CHRNA7(1607), ANK3(1692), HTR6(1709), SLC6A2(1726), GABRA5(1819), CD3E(1870), NOS3(1941), GRIK1(1968) |
| DTNBP1 | 1.58E-11 | DAOA(1), DISC1(5), FZD3(16), SYN3(19), CHRFBAM7A(38), COMT(53), HTR2A(59), TPH2(66), DRD4(73), GRIK3(76), SLC6A4(89), HTR6(96), DRD3(97), GRIK4(107), GPR50(120), DRD2(143), WFS1(195), ABCB1(196), TPH1(199), GRIA4(229), TNF(269), GAD1(275), CTLA4(284), GNAS(301), GNB3(329), SLC6A3(333), IL6(343), APOE(393), HTR5A(437), MTHFR(438), IL1B(443), ADRA2B(605), MAOA(642), GMIP(794), GRIA3(950), ESR1(954), GRIN1(966), SLC6A2(996), ADRA2C(1018), HTR2C(1020), GABRA3(1025), GRIN2B(1052), DRD1(1094), HTR1A(1119), BDNF(1141), ACE(1151), CYP2C9(1210), SERPINA3(1287), CHRNA7(1323), TDRD3(1327), FGFR2(1353), HTR1B(1420), TH(1454), GNAL(1490), GRIA1(1494), ADRB1(1610), DDC(1661), DRD5(1771), NOS3(1824), AKT1(1896), PSMD9(1954)                                                                                                                                                                                                                                                                                                                                                                                                                                              |
| GAD1   | 6.11E-10 | GABBR1(3), SLC6A1(7), GABRA5(19), GABRA3(20), DDC(23), GABRA6(35), GRIK3(57), GRIA3(58), TH(68), GRIA1(86), GRIA4(114), GRM7(165), GRIN1(184), DRD2(206), PENK(240), GRIK4(243), GRIN2C(246), DRD1(263), BDNF(282), GRIN2D(327), MYO5B(338), GRIA2(356), FGFR2(403), DRD3(442), HTR1A(480), IL6(486), HTR2A(511), TAC1(539), GRIN2B(548), DTNBP1(580), HTR3A(584), GRIK1(593), KCNC2(608), ADRA2B(609), ADRA2C(663), TACR1(674), TNF(677), GRIN2A(693), HTR5A(744), NTRK2(873), FZD3(895), NOS1(915), LEPR(927), GNAS(935), HTR1B(993), NGFR(994), POMC(1009), GRIK2(1026), DRD5(1066), ESR1(1067), IL1B(1098), ITPR1(1104), CACNA1C(1111), GRIK5(1136), GNAL(1143), ROS1(1158), OLIG2(1197), PSMD9(1254), NPY(1298), HTR2C(1366), GRIN3A(1457), OLIG1(1540), SLC6A4(1568), CCND2(1577), FGFR1(1646), CREB1(1674), NTRK3(1695), NR3C1(1728), PDE10A(1824), TPH2(1851), ADRA1B(1885), SLC6A2(1896), ADCY9(1908), CCKBR(1910), APOE(1923), FGFR3(1925)                                                                                                                                                                                                                                        |
| SLC6A1 | 1.97E-08 | GABBR1(5), GABRA5(16), GABRA3(19), GAD1(29), GABRA6(32), SLC6A2(48), SLC6A4(72), SLC6A3(87), GRIK3(184), GRIA3(186), GRIA1(190), HTR3A(207), GRM7(241), CACNA1C(308), HTR1A(318), GRIA4(320), TH(331), GRIN1(353), KCNC2(356), ITPR1(449), GRIA2(456), GRIN2C(469), ABCB1(475), GRIN2D(488),                                                                                                                                                                                                                                                                                                                                                                                                                                                                                                                                                                                                                                                                                                                                                                                                                                                                                                |

|       |          |                                                                                                                                                                                                                                                                                                                                                                                                                                                                                                                                                                                                                                                                                                                                                                                                                                                                                                                                    |
|-------|----------|------------------------------------------------------------------------------------------------------------------------------------------------------------------------------------------------------------------------------------------------------------------------------------------------------------------------------------------------------------------------------------------------------------------------------------------------------------------------------------------------------------------------------------------------------------------------------------------------------------------------------------------------------------------------------------------------------------------------------------------------------------------------------------------------------------------------------------------------------------------------------------------------------------------------------------|
|       |          | DRD1(497), PCLO(515), DRD2(554), GRIN2B(563), GRIN2A(571), HTR5A(604), TACR1(610), ANK3(621), HTR1B(626), ADRA2B(670), ADRA2C(697), GRIK1(707), BDNF(731), ADRA1A(776), HTR2A(805), IL6(869), ADRA1B(872), GRIK2(876), MYO5B(896), TAC1(913), P2RX7(929), HTR2C(964), TNF(966), CNR1(986), CHRM2(996), CHRNA7(1003), ROS1(1009), AGTR1(1038), GRIK5(1060), GRIN3A(1133), PENK(1137), ADORA2A(1163), HTR6(1188), NOS1(1194), IL1B(1215), ADRB1(1249), P2RX4(1332), ADRA2A(1336), NTRK2(1349), DRD5(1385), DRD3(1391), GRIK4(1516), FGFR2(1545), CCKBR(1582), AKT1(1631), ESR1(1667), GNAS(1679), NR3C1(1778), NGFR(1791), CREB1(1817), HTR2B(1857), PSMB4(1862), LEPR(1894), POMC(1988)                                                                                                                                                                                                                                             |
| SYN3  | 3.93E-08 | DTNBP1(4), DAOA(5), DISC1(34), PCLO(69), GRIK3(109), FZD3(113), DRD3(131), DRD4(136), HTR2A(137), DRD2(140), GRIA1(142), SLC6A4(176), GRIA3(214), GRIA4(225), GRM7(263), CHRFAM7A(272), GAD1(291), BDNF(295), GRIN1(298), TH(302), TPH2(318), DRD1(319), GNAS(339), GRIN2B(349), SLC6A3(391), HTR6(410), COMT(427), ADRA2B(454), AGTR1(471), GRIK4(500), SLC6A2(505), TNF(542), NOS1(543), FGFR2(568), GABBR1(573), GNB3(576), IL6(631), APOE(698), IL1B(833), HTR1A(850), ADRA2C(857), GRIK1(882), GPR50(884), HTR1B(885), ITPR1(901), ACE(902), ADCY9(940), ANK3(954), ABCB1(963), NOS3(990), GRIN2A(1038), SLC6A1(1047), GRIA2(1057), DRD5(1080), HTR2C(1085), CTLA4(1141), MYO5B(1145), CACNA1C(1192), ESR1(1219), GABRA3(1223), TPH1(1232), GNAL(1274), NTRK2(1341), MAOA(1405), GRIK2(1433), GSK3B(1542), ADRB1(1611), FGFR3(1692), CYP2C9(1728), GABRA5(1731), HTR5A(1768), DDC(1793), GRIN2D(1824), ROS1(1836), NGFR(1839) |
| PDE2A | 6.40E-08 | PDE11A(1), PDE5A(2), PDE9A(4), PDE10A(5), PDE1A(13), PDE6C(21), ADCY9(59), CREB1(69), TNF(85), NOS3(123), ADRA1A(132), GNAS(150), ADRB1(153), CACNA1C(175), IL1B(186), NOS1(190), ADRA2B(209), IL6(230), ADORA2A(243), AKT1(257), CAMKK2(311), ADRA2A(495), ADRA1B(547), ITPR1(562), TH(652), ADRA2C(712), NFKB1(724), MMP2(729), HTR2B(813), GRIA4(879), AGTR1(941), DRD1(1163), HTR5A(1168), PSMB4(1193), FGFR2(1295), ESR1(1367), CRHR1(1394), POMC(1396), HTR2A(1418), GRM7(1441), TAC1(1464), GSK3B(1567), GRIA3(1656), SERPINA3(1704), ANK3(1884), NR3C1(1885), PSMD9(1924), FGFR1(1927)                                                                                                                                                                                                                                                                                                                                     |
| MMP2  | 1.00E-07 | TNF(44), IL6(55), IL1B(68), AKT1(141), NFKB1(161), AGTR1(173), SERPINA3(237), CCL2(259), NOS3(283), ESR1(293), ADRA2B(348), APOE(358), FGFR2(362), LEPR(365), ADRB1(405), LRP1(458), ABCB1(460), TAC1(494), LEP(552), ESR2(566), FGFR1(580), ADRA1A(602), TACR1(613), PLA2G2A(625), TH(636), STAT3(644), POMC(665), CACNA1C(668), FGFR4(728), NR3C1(740), NOS1(818), GSK3B(837), ADORA2A(848), PRKCH(873), CREB1(913), ACE(930), GNAS(968), ADRA1B(992), DUSP6(995), AR(1071), PLA2G4A(1073), CCKBR(1102), ITPR1(1125), HTR2A(1175), FGFR3(1214), ADRA2C(1221), DRD1(1243), CCND2(1286), ADRA2A(1290), PENK(1325), DRD2(1344), CTLA4(1376), P2RX7(1468), CRHR1(1553), HTR1A(1599), PSMD9(1677), HTR2B(1748), ADCY9(1822), GSK3A(1867), CHRM2(1913)                                                                                                                                                                                 |
| GNAS  | 1.07E-07 | ADCY9(15), GNAL(26), ADRA2B(45), ADRB1(62), ADRA1A(63), TNF(79), ADRA1B(98), GNB3(125), HTR6(169), ADRA2A(177), ESR1(189), ADRA2C(211), FGFR2(217), IL6(219), CACNA1C(224), DRD1(242), SERPINA3(312), HTR1A(313), POMC(350), AGTR1(502), GABRA6(505), FGFR3(517), NR3C1(560), TH(571), IL1B(685), GRIA4(727), DRD2(752), GRIA3(778), HTR2A(786), CREB1(788), DRD5(796), ABCB1(803), CRHR1(843), GABRA5(860), GRIK3(870), GABRA3(904), PSMD9(946), LEPR(958), ESR2(1022), AR(1102), PSMB4(1106), AVPR1B(1116), HTR5A(1221), ITPR1(1257),                                                                                                                                                                                                                                                                                                                                                                                            |

|         |          |                                                                                                                                                                                                                                                                                                                                                                                                                                                                                                                                                                                                                                                                                                                                                                                                                                                                                                                        |
|---------|----------|------------------------------------------------------------------------------------------------------------------------------------------------------------------------------------------------------------------------------------------------------------------------------------------------------------------------------------------------------------------------------------------------------------------------------------------------------------------------------------------------------------------------------------------------------------------------------------------------------------------------------------------------------------------------------------------------------------------------------------------------------------------------------------------------------------------------------------------------------------------------------------------------------------------------|
|         |          | ROS1(1269), ANK3(1396), HTR2C(1468), PDE1A(1474), HTR3A(1487), DRD3(1534), AKT1(1565), GSK3A(1575), CTLA4(1591), PDE11A(1642), LEP(1657), GABBR1(1672), WFS1(1705), NFKB1(1754), APOE(1771), GRIA1(1809), SLC6A4(1843), ADORA2A(1907), TAC1(1971), GRIN1(1984)                                                                                                                                                                                                                                                                                                                                                                                                                                                                                                                                                                                                                                                         |
| PLA2G2A | 1.17E-07 | PLA2G4A(7), IL1B(36), IL6(40), TNF(50), MMP2(166), NFKB1(168), CACNA1C(193), AKT1(249), AGTR1(286), ADRA2B(327), APOE(351), ITPR1(380), ADRA1A(394), SERPINA3(409), TH(440), CCL2(497), HTR2A(555), TAC1(557), HTR2B(602), ADORA2A(688), ESR1(695), GNAS(704), TACR1(734), LEPR(740), FGFR2(765), ABCB1(780), ACSL4(827), NR3C1(838), CREB1(923), LEP(952), NOS3(977), ADRB1(1003), P2RX7(1025), PRKCH(1062), GRM7(1123), GSK3B(1130), POMC(1156), LRP1(1185), DRD2(1198), CCKBR(1233), DRD1(1238), NOS1(1306), PDE1A(1325), HTR2C(1363), FGFR1(1368), STAT3(1425), ADRA1B(1453), GRIA3(1455), PSMD9(1471), FGFR4(1525), PSMB4(1540), PENK(1568), GRIA4(1574), HTR3A(1614), ESR2(1721), ADCY9(1808), CRHR1(1859), ACE(1872), CCKAR(1874), PDE5A(1941)                                                                                                                                                                  |
| PER2    | 1.44E-07 | PER3(1), PER1(2), CLOCK(3), CREB1(101), HTR1B(165), GSK3B(176), IL6(179), TH(189), TPH2(300), TNF(305), POMC(345), GRIN2C(377), PENK(414), NR3C1(426), CCND2(473), IL1B(481), DRD1(482), FGFR2(590), GRIA3(592), ROS1(609), AKT1(640), HTR7(647), HTR5A(654), NFKB1(686), LEPR(759), ESR1(766), GAD1(847), ITPR1(876), ADRA2B(931), DRD2(949), TAC1(992), AGTR1(995), LEP(1005), DDC(1061), GRIA1(1154), CRHR1(1169), PSMD9(1208), GRIA4(1209), DRD3(1218), GRIN1(1231), GNAS(1245), DUSP6(1391), NPY(1458), HTR1A(1459), CRHR2(1523), STAT3(1595), GRIN2A(1605), GRM7(1611), TACR1(1640), AVPR1A(1659), SLC6A2(1736), ABCB1(1790), GABRA3(1796), GRIN2D(1800), CCKBR(1847), PHACTR3(1965), ESR2(1993)                                                                                                                                                                                                                 |
| PLA2G4A | 1.67E-07 | PLA2G2A(6), TNF(47), IL6(74), IL1B(85), ITPR1(93), CACNA1C(95), AKT1(96), NFKB1(120), ADRA2B(218), ADRA1A(294), AGTR1(346), ACSL4(376), ESR1(384), MMP2(393), PRKCH(440), STAT3(499), CREB1(508), ADORA2A(510), GSK3B(518), TH(578), ADRB1(623), NOS3(632), P2RX7(651), ADRA1B(662), CCL2(663), NR3C1(688), CAMKK2(698), LEPR(701), GNAS(719), ADRA2A(763), FGFR2(765), NOS1(791), TAC1(794), TACR1(818), GSK3A(828), HTR2B(836), APOE(863), SERPINA3(903), DRD1(915), POMC(928), FGFR1(971), LEP(973), ADRA2C(994), HTR2A(1054), PDE1A(1070), CCKBR(1190), HTR2C(1199), GRM7(1200), ESR2(1237), DUSP6(1273), ADCY9(1372), DRD2(1383), GRIA4(1398), ABCB1(1440), CRHR1(1447), GRIA3(1483), LRP1(1501), PSMD9(1629), HTR3A(1640), FGFR4(1697), HTR1A(1777), CHRM2(1811), GRIN2C(1832)                                                                                                                                   |
| NTRK3   | 1.92E-07 | NTRK2(2), NGFR(5), BDNF(8), TH(26), FGFR2(105), GRIA3(151), TAC1(156), FGFR1(166), TACR1(236), HTR3A(293), GRIN1(311), DRD1(318), GRIA1(320), ROS1(327), AKT1(331), FGFR3(334), GRIN2C(380), GAD1(387), GRIA4(392), FGFR4(431), ITPR1(492), GRIN2D(508), GABBR1(512), DRD2(526), DRD3(540), GSK3B(570), HTR2B(589), ADRA2B(593), OLIG1(603), IL6(622), PENK(624), TNF(625), PTPRR(630), FZD3(632), HTR1A(647), ADRA2C(687), HTR2C(694), ESR1(702), CNTF(721), ADRA1B(734), GABRA6(747), GRIK3(755), ADRA1A(778), CREB1(783), GRIA2(788), OLIG2(818), GRIN2B(848), HTR2A(851), HTR5A(858), HTR1B(861), NOS1(890), ADORA2A(903), GABRA3(904), GSK3A(910), GRIN2A(913), NR3C1(928), GRM7(957), AGTR1(964), CHRM2(1009), CCKBR(1011), DUSP6(1016), GRIK4(1025), ESR2(1026), ADRB1(1070), LEPR(1088), CACNA1C(1113), STAT3(1124), OPRK1(1132), CRHR2(1190), POMC(1200), DRD5(1262), CRHR1(1283), SLC6A2(1292), OPRD1(1304), |

|        |          |                                                                                                                                                                                                                                                                                                                                                                                                                                                                                                                                                                                                                                                                                                                                                                                                                                                                                                                                                                                                 |
|--------|----------|-------------------------------------------------------------------------------------------------------------------------------------------------------------------------------------------------------------------------------------------------------------------------------------------------------------------------------------------------------------------------------------------------------------------------------------------------------------------------------------------------------------------------------------------------------------------------------------------------------------------------------------------------------------------------------------------------------------------------------------------------------------------------------------------------------------------------------------------------------------------------------------------------------------------------------------------------------------------------------------------------|
|        |          | GNAS(1373), IL1B(1400), NFKB1(1453), CCND2(1470), GABRA5(1493), AR(1537), CNR1(1545), ADRA2A(1560), GRIK1(1740), OPRM1(1778), P2RX7(1783), GRIN3A(1859), PRKCH(1872), LRP1(1875), HTR6(1913), ANK3(1980)                                                                                                                                                                                                                                                                                                                                                                                                                                                                                                                                                                                                                                                                                                                                                                                        |
| PER1   | 2.17E-07 | PER2(1), PER3(2), CLOCK(3), CREB1(70), TH(151), HTR1B(200), GSK3B(204), IL6(211), POMC(338), NR3C1(391), PENK(421), TNF(441), TPH2(465), GRIN2C(476), DRD1(526), ROS1(581), FGFR2(610), LEPR(627), AKT1(640), ESR1(702), HTR7(705), ITPR1(708), IL1B(738), NFKB1(744), HTR5A(751), CCND2(756), ADRA2B(784), LEP(788), DDC(795), GAD1(827), TAC1(840), DRD2(897), CRHR1(921), AGTR1(1046), HTR2C(1140), DRD3(1171), GNAS(1200), HTR1A(1207), GRIA3(1219), CRHR2(1231), NOS1(1333), ADRA1A(1365), GRIN1(1402), TACR1(1413), ADRB1(1441), ADRA1B(1485), HTR2B(1487), NPY(1537), PSMD9(1546), CCKBR(1612), GRIA1(1618), STAT3(1621), ADRA2C(1667), GRIA4(1724), PRKCH(1777), DUSP6(1839), GRIN2A(1878), GABBR1(1883), ADRA2A(1918), ESR2(1972)                                                                                                                                                                                                                                                      |
| CREB1  | 1.09E-06 | AKT1(63), CAMKK2(81), NFKB1(121), TNF(141), TH(154), GSK3B(156), DRD1(158), IL6(185), NR3C1(226), STAT3(233), GRIN1(273), PDE10A(288), ADRB1(296), IL1B(332), TCF20(334), ESR1(343), PDE1A(351), PDE11A(360), PDE2A(366), GRIA1(377), GNAS(421), ADRA1A(425), ADORA2A(456), CRHR1(463), FGFR2(466), ADCY9(467), PRKCH(468), DRD2(549), ITPR1(553), BDNF(570), GRIN2B(646), HTR1A(661), GSK3A(669), GRM7(672), CRHR2(673), GRIN2C(719), GRIN2A(746), FGFR1(778), ADRA1B(840), ADRA2B(847), ADRA2C(878), CACNA1C(893), TACR1(903), CCND2(906), DRD5(917), POMC(925), AR(943), ROS1(967), ESR2(986), DRD3(1009), ADRA2A(1032), DUSP6(1048), TAC1(1065), PENK(1128), PSMD9(1139), GRIA3(1145), NTRK2(1159), AGTR1(1189), NOS1(1325), OPRK1(1329), HTR1B(1358), LEPR(1364), NGFR(1365), GRIA4(1393), GABBR1(1398), OPRD1(1415), PER1(1464), GRIN2D(1478), TFCP2(1548), OPRM1(1584), MMP2(1623), FGFR4(1647), GRIA2(1718), FGFR3(1729), PDE5A(1733), CCKBR(1777), HTR2A(1821), LEP(1934), HTR2C(1973) |
| PDE10A | 1.75E-06 | PDE11A(1), PDE9A(2), PDE2A(4), PDE5A(7), PDE1A(15), PDE6C(19), CREB1(57), ADCY9(97), DRD1(112), TH(138), GNAS(166), GNAL(200), PENK(218), DRD2(239), ADORA2A(249), GRIN2C(310), GAD1(391), GRIA1(409), GRIA3(511), GRIA4(528), CACNA1C(540), DRD5(545), GRM7(556), GRIN1(653), ITPR1(666), ADRA1A(771), ADRA2C(798), ADRA2B(826), PHACTR3(841), PSMB4(906), GABBR1(907), DRD3(940), ADRB1(984), TAC1(1047), GRIK3(1169), GRIN2D(1179), HTR7(1185), AKT1(1227), CRHR1(1376), HTR3A(1394), ADRA1B(1455), MYO5B(1464), GABRA6(1478), GRIN2B(1490), IL6(1553), NOS1(1599), HTR5A(1641), HTR1A(1655), GRIN2A(1701), DNAJB2(1713), CAMKK2(1744), HTR4(1760), GRIN3A(1775), FGFR2(1854), PSMD9(1922)                                                                                                                                                                                                                                                                                                   |
| ITPR1  | 2.17E-06 | CACNA1C(19), HTR3A(102), GRM7(113), GRIA4(134), ADRA1A(146), GRIA3(153), GRIA1(174), HTR5A(185), CAMKK2(210), GRIN2C(223), GRIN1(230), ADRA2B(231), DRD1(240), GRIN2D(252), HTR2B(258), HTR1A(265), HTR2C(269), AGTR1(273), GABBR1(299), HTR2A(337), GRIA2(343), CRHR1(350), ADRA1B(354), GRIN2B(366), ADRB1(368), GRIN2A(373), CHRM2(385), PDE1A(386), AKT1(392), HTR6(397), TACR1(408), P2RX7(411), P2RX4(434), GABRA6(438), FGFR2(439), ADORA2A(441), IL6(475), GRIK3(478), ESR1(505), TNF(529), NR3C1(531), HTR1B(553), CCKBR(559), DRD2(570), ANK3(580), TH(583), HTR7(591), ADCY9(606), HTR4(610), GRIN3A(666), PLA2G4A(671), ROS1(688), DRD3(701), ADRA2C(714), CREB1(748), HTR3B(755), CRHR2(756), IL1B(810), ADRA2A(822), FGFR1(830), GNAS(855), AVPR1B(898), AVPR1A(915), DRD5(978), FGFR4(1007), CCKAR(1027), GABRA3(1039), LEPR(1072),                                                                                                                                              |

|       |          |                                                                                                                                                                                                                                                                                                                                                                                                                                                                                                                                                                                                                                                                                                                                                                                                                                                                                                                                                                                            |
|-------|----------|--------------------------------------------------------------------------------------------------------------------------------------------------------------------------------------------------------------------------------------------------------------------------------------------------------------------------------------------------------------------------------------------------------------------------------------------------------------------------------------------------------------------------------------------------------------------------------------------------------------------------------------------------------------------------------------------------------------------------------------------------------------------------------------------------------------------------------------------------------------------------------------------------------------------------------------------------------------------------------------------|
|       |          | GSK3B(1092), OPRD1(1138), ESR2(1185), TAC1(1214), NFKB1(1239), FGFR3(1273), PRKCH(1367), PSMD9(1396), LRP1(1406), KCNC2(1414), CNR1(1437), GRIK1(1478), OPRK1(1520), PSMB4(1527), CHRNA7(1572), GRIK5(1588), GRIK2(1611), AR(1638), NOS1(1682), GABRA5(1688), GRIK4(1774), MYO5B(1794), NGFR(1842), POMC(1898), NTRK2(1963)                                                                                                                                                                                                                                                                                                                                                                                                                                                                                                                                                                                                                                                                |
| LRP1  | 3.31E-06 | APOE(22), TNF(87), ESR1(146), SERPINA3(183), IL6(191), ADRA2B(200), ADRB1(204), FGFR2(215), NR3C1(258), AKT1(270), MMP2(293), AGTR1(327), IL1B(331), ADRA1A(342), FGFR1(343), ITPR1(375), DRD1(466), ADRA1B(489), ESR2(498), LEPR(526), TACR1(528), NFKB1(586), GNAS(599), GRIA4(656), GRIA3(661), HTR3A(672), PSMB4(732), ADRA2A(760), DRD2(769), CCKBR(777), HTR2A(787), FGFR4(790), PSMD9(815), ADRA2C(820), HTR2B(827), HTR1A(846), HTR6(848), AR(859), GRIN1(871), CRHR1(914), NGFR(917), GSK3B(932), ROS1(938), ADORA2A(1002), CACNA1C(1003), DRD3(1011), FGFR3(1020), CREB1(1055), TH(1080), GRIA1(1108), GRIK3(1110), STAT3(1125), HTR2C(1158), CHRM2(1232), ABCB1(1284), CD3E(1312), CCL2(1335), GABRA6(1340), POMC(1368), HTR5A(1384), P2RX7(1418), GRIN2C(1422), OPRD1(1455), GRIN2D(1466), GABRA3(1484), TAC1(1489), GRIN2A(1506), CRHR2(1546), LEP(1587), GRIN2B(1602), GABBR1(1622), PRKCH(1625), EHD3(1660), GSK3A(1739), M6PR(1759), GRIN3A(1811), FKBP5(1865), DRD5(1996) |
| TBX21 | 4.36E-06 | IL6(48), IL1B(74), TNF(87), CTLA4(95), CD3E(123), NFKB1(242), STAT3(349), TH(484), CCL2(503), TAC1(574), TACR1(595), AKT1(639), PENK(645), ESR1(691), ABCB1(719), PSMD9(792), APOE(802), LEPR(811), CREB1(826), NR3C1(847), AGTR1(900), CCND2(918), FGFR2(948), POMC(982), MMP2(1024), ADORA2A(1070), NOS3(1101), LEP(1116), ADRB1(1152), P2RX7(1287), FGFR1(1302), GNAS(1364), FGFR3(1370), GNB3(1385), GSK3B(1416), ADCY9(1444), ESR2(1456), TFCP2(1542), ITPR1(1627), PRKCH(1653), PLA2G4A(1729), FGFR4(1744), ADRA2B(1799), SERPINA3(1812), GABRA6(1860), AR(1872), OLIG2(1910), NOS1(1920)                                                                                                                                                                                                                                                                                                                                                                                            |
| ADCY9 | 1.13E-05 | GNAS(13), ADRB1(16), ADRA2B(35), PDE1A(56), DRD1(62), ADRA1A(63), GNAL(65), HTR6(83), CACNA1C(92), PDE2A(100), DRD5(140), ADRA2A(163), ADRA2C(236), CRHR1(284), TH(315), ITPR1(328), CREB1(358), ADRA1B(366), DRD2(409), HTR1A(492), HTR5A(522), PDE11A(659), HTR7(705), TDRD3(753), HTR4(880), NR3C1(882), PDE10A(912), TNF(946), CRHR2(973), IL6(984), GRM7(1029), PDE9A(1054), GRIA4(1166), FGFR2(1186), CAMKK2(1250), PSMD9(1264), PRKCH(1272), ADORA2A(1310), IL1B(1359), PSMB4(1364), DRD3(1377), PHACTR3(1627), GRIA3(1648), HTR2A(1678), ROS1(1824), AGTR1(1834), AKT1(1895)                                                                                                                                                                                                                                                                                                                                                                                                       |
| STAT3 | 3.35E-05 | IL6(10), AKT1(36), IL1B(47), NFKB1(53), TNF(58), CREB1(218), FGFR4(222), GSK3B(295), LEPR(300), FGFR2(302), FGFR3(400), FGFR1(405), LEP(422), ESR1(439), PRKCH(549), DUSP6(555), NR3C1(560), CNTF(561), TH(598), CCND2(629), CCL2(710), GSK3A(758), ROS1(816), MMP2(900), TCF20(1001), ADRA1B(1036), AGTR1(1072), ADRB1(1125), AR(1144), POMC(1194), ESR2(1199), PSMD9(1204), ADRA1A(1243), ITPR1(1352), NGFR(1360), DRD1(1390), GNAS(1492), CD3E(1625), TACR1(1638), PLA2G4A(1647), LRP1(1701), ADORA2A(1729), TAC1(1744), TBX21(1790), CCKBR(1817), P2RX7(1909), ADRA2B(1931)                                                                                                                                                                                                                                                                                                                                                                                                            |
| PER3  | 7.74E-05 | PER2(1), PER1(2), CLOCK(3), CREB1(118), TPH2(179), GSK3B(184), IL6(296), TH(363), DTNBP1(380), HTR1B(390), ROS1(533), TNF(557), FGFR2(558), DDC(681), NR3C1(802), POMC(808), ESR1(836), ADRA2B(864), GNAS(898), IL1B(1007), ADCY9(1046), HTR5A(1073), AKT1(1155), AGTR1(1159), PENK(1177), SLC6A4(1238), DRD1(1244),                                                                                                                                                                                                                                                                                                                                                                                                                                                                                                                                                                                                                                                                       |

|        |          |                                                                                                                                                                                                                                                                                                                                                                                                                                                                                                                                                                                                                                                                                                              |
|--------|----------|--------------------------------------------------------------------------------------------------------------------------------------------------------------------------------------------------------------------------------------------------------------------------------------------------------------------------------------------------------------------------------------------------------------------------------------------------------------------------------------------------------------------------------------------------------------------------------------------------------------------------------------------------------------------------------------------------------------|
|        |          | PSMD9(1263), HTR7(1276), DRD2(1310), HTR2A(1340), GABRA3(1361), DRD3(1378), DAOA(1443), ABCB1(1444), GRIN2C(1490), GAD1(1547), LEPR(1587), NFKB1(1613), ITPR1(1660), GRIA3(1760), CCND2(1912)                                                                                                                                                                                                                                                                                                                                                                                                                                                                                                                |
| PDE1A  | 0.000329 | PDE11A(3), PDE2A(5), PDE9A(8), PDE10A(10), PDE5A(17), PDE6C(27), CAMKK2(33), CACNA1C(57), ADCY9(60), ADRA1A(83), ITPR1(96), CREB1(131), GNAS(310), HTR4(452), HTR1A(519), FGFR2(615), AKT1(703), GRM7(730), ADRA1B(800), MYO5B(1036), HTR3A(1282), TH(1303), PSMB4(1322), ADRB1(1362), DRD1(1421), ADRA2B(1472), HTR5A(1608), AGTR1(1662), TNF(1690), IL6(1780), GRIA3(1837), FGFR4(1860), FGFR1(1871), NR3C1(1957), GRIA4(1963), GABBR1(1964)                                                                                                                                                                                                                                                               |
| NFKB1  | 0.00036  | TNF(36), IL1B(72), IL6(74), AKT1(106), STAT3(223), CCL2(257), GSK3B(291), NR3C1(348), CREB1(367), ESR1(550), OPRK1(574), MMP2(656), PRKCH(679), DUSP6(801), TFCP2(805), PSMD9(925), FGFR2(947), AGTR1(1035), CCND2(1045), GSK3A(1131), ADRA1A(1138), NFE2L3(1141), TACR1(1161), NOS3(1191), POMC(1203), ADRB1(1214), TAC1(1276), PLA2G4A(1286), TH(1295), CD3E(1297), ADORA2A(1332), PSMB4(1336), FGFR1(1359), ESR2(1371), AR(1448), NGFR(1473), GNAS(1491), LEPR(1520), ABCB1(1552), ADRA1B(1553), ITPR1(1577), NOS1(1586), GRIN2C(1609), P2RX7(1610), CACNA1C(1623), SERPINA3(1651), TCF20(1692), DRD1(1707), ADRA2B(1774), CCKBR(1798), FGFR4(1804), CTLA4(1831), PLA2G2A(1901), OPRD1(1925), FGFR3(1963) |
| PDE11A | 0.000798 | PDE9A(1), PDE10A(2), PDE2A(3), PDE5A(4), PDE1A(11), PDE6C(19), CREB1(52), ADCY9(77), GNAS(95), ADRA1A(382), ADRA2B(522), CACNA1C(650), TDRD3(875), FGFR2(1117), ADRB1(1129), PHACTR3(1427), ITPR1(1461), PSMB4(1464), TH(1486), IL6(1524), HTR4(1751), ADRA2C(1870)                                                                                                                                                                                                                                                                                                                                                                                                                                          |
| FGFR4  | 0.000865 | FGFR1(1), FGFR2(2), FGFR3(8), STAT3(115), DUSP6(173), ESR1(246), AKT1(253), IL6(263), TH(306), TNF(308), ROS1(562), ITPR1(597), NR3C1(675), ESR2(715), TCF20(805), ADRA2B(890), IL1B(892), PRKCH(893), NFKB1(909), GNAS(919), AR(939), AGTR1(959), CCKBR(986), GRIA4(1010), HTR2B(1092), CCND2(1122), MMP2(1130), ADRA1A(1134), GSK3B(1193), NGFR(1244), DRD1(1270), GRIA3(1379), HTR3A(1383), TACR1(1434), CREB1(1439), CRHR1(1487), POMC(1495), AVPR1B(1553), LEPR(1573), LRP1(1619), FZD3(1634), HTR2A(1642), ADRA1B(1681), ADRB1(1693), DRD2(1815), CACNA1C(1857), PTPRR(1939), GSK3A(1956), HTR2C(1960)                                                                                                 |
| CLOCK  | 0.000903 | PER3(2), PER1(3), PER2(4), CREB1(161), TH(236), GSK3B(271), HTR1B(304), ROS1(318), IL6(323), TPH2(431), DDC(469), POMC(533), FGFR2(636), TNF(716), DRD1(845), ESR1(851), DRD2(863), NR3C1(915), ADRA2B(1010), LEPR(1075), DRD3(1079), PENK(1102), IL1B(1119), GNAS(1198), AGTR1(1243), CCND2(1259), HTR7(1282), PSMD9(1424), GRIN2C(1435), ITPR1(1448), HTR1A(1489), GAD1(1527), TAC1(1554), AVPR1A(1632), NFKB1(1651), HTR5A(1660), LEP(1695), CRHR1(1744), AKT1(1967), AVPR1B(1978)                                                                                                                                                                                                                        |
| KCNC2  | 0.001519 | CACNA1C(29), HTR3A(165), GRIA3(187), GABRA6(190), GABRA3(193), GRIA4(195), GRIN2D(206), GABBR1(214), ANK3(215), GRIN2C(224), GRIA1(247), ITPR1(263), GAD1(265), GABRA5(279), GRIN1(286), SLC6A1(288), GRIK3(303), GRM7(318), GRIN2A(323), GRIN2B(329), HTR3B(338), GRIA2(356), P2RX4(404), ADRA1B(413), ADRA2B(415), GRIK1(422), TH(440), HTR1B(484), GRIK4(485), GRIK5(489), ADRA2C(505), GRIK2(537), CHRNA7(556), IL6(626), GNAS(766), LEPR(799), HTR5A(806), GRIN3A(828), ADRA1A(829), HTR1A(831), DRD1(957), CHRM2(992), DRD2(1011), P2RX7(1070), HTR2C(1082), NOS1(1092), PSMB4(1098), BDNF(1109), PENK(1138), TNF(1150), HTR2A(1191), PHACTR3(1295), FGFR2(1299), IL1B(1319),                          |

|         |          |                                                                                                                                                                                                                                                                                                                                                                                                                                                                                                                                                                                                                                                                                                                                                                                                                                                                                                                                                                                                                     |
|---------|----------|---------------------------------------------------------------------------------------------------------------------------------------------------------------------------------------------------------------------------------------------------------------------------------------------------------------------------------------------------------------------------------------------------------------------------------------------------------------------------------------------------------------------------------------------------------------------------------------------------------------------------------------------------------------------------------------------------------------------------------------------------------------------------------------------------------------------------------------------------------------------------------------------------------------------------------------------------------------------------------------------------------------------|
|         |          | TAC1(1381), TACR1(1510), ADCY9(1546), HTR2B(1754), FBXO8(1760), ADRA2A(1784), DRD3(1789), PSMD9(1843), POMC(1962), ADRB1(1965), MYO5B(1979)                                                                                                                                                                                                                                                                                                                                                                                                                                                                                                                                                                                                                                                                                                                                                                                                                                                                         |
| M6PR    | 0.002267 | IL6(70), AGTR1(313), HTR6(385), FGFR2(393), HTR3A(424), ADRA2B(469), DRD1(471), GRIA3(533), TNF(555), HTR2B(579), LRP1(594), GRIA4(595), FGFR1(597), ADRB1(601), EHD3(642), ITPR1(649), NR3C1(672), ESR1(718), ADRA1A(838), TACR1(880), TH(917), GABRA6(932), GNAS(948), CCKBR(955), HTR2C(965), DRD2(1040), ABCB1(1047), HTR5A(1081), HTR2A(1093), GRIA1(1127), MYO5B(1182), FGFR3(1202), LEPR(1225), IL1B(1232), CHRM2(1236), FGFR4(1239), ADRA1B(1310), P2RX7(1326), OPRD1(1336), DRD3(1342), GRIN1(1361), GRIK3(1375), ANK3(1397), PSMB4(1428), GABBR1(1445), ROS1(1479), ADORA2A(1487), AR(1506), GABRA3(1549), GRM7(1554), CACNA1C(1569), ESR2(1573), HTR1A(1583), AKT1(1640), ADRA2C(1673), CRHR1(1738), PSMD9(1889), OPRK1(1891), DRD5(1909)                                                                                                                                                                                                                                                                |
| PDE6C   | 0.003398 | PDE11A(5), PDE9A(6), PDE10A(7), PDE2A(9), PDE5A(12), PDE1A(20), PSMB4(141), GNAS(302), ROS1(321), CACNA1C(490), GABRA6(702), ADRA2B(833), GABRA5(1064), GABRA3(1067), ADRA1A(1078), SERPINA3(1112), GNAL(1165), TNF(1235), ADRA1B(1363), GRIA4(1512), GRIA3(1859)                                                                                                                                                                                                                                                                                                                                                                                                                                                                                                                                                                                                                                                                                                                                                   |
| CCND2   | 0.003477 | DRD2(21), DRD1(45), DRD3(61), PSMD9(106), AKT1(233), FGFR2(266), IL6(305), DRD5(309), TNF(381), GSK3B(456), NFKB1(478), TH(557), ESR1(638), STAT3(712), ROS1(780), FGFR1(857), CREB1(859), IL1B(941), PRKCH(958), FGFR3(979), FGFR4(1261), GNAS(1438), ESR2(1439), NR3C1(1479), DUSP6(1537), AR(1665), FBXO8(1689), ZNF804A(1801), ITPR1(1977)                                                                                                                                                                                                                                                                                                                                                                                                                                                                                                                                                                                                                                                                      |
| FGFR1   | 0.004106 | FGFR2(1), FGFR4(5), FGFR3(15), DUSP6(90), AKT1(222), TH(263), ROS1(283), TNF(439), IL6(532), STAT3(541), ESR1(597), NGFR(646), OLIG1(661), ITPR1(757), NR3C1(763), GSK3B(766), HTR2B(811), NFKB1(911), CREB1(928), DRD1(929), AGTR1(947), PTPRR(1019), AR(1035), ADRA2B(1038), ADRA1A(1059), CCND2(1081), IL1B(1109), ADRB1(1127), LRP1(1134), TACR1(1174), GNAS(1208), PRKCH(1227), NTRK2(1250), MMP2(1278), CCKBR(1297), TCF20(1308), HTR3A(1334), GSK3A(1335), ESR2(1371), GRIA3(1380), NTRK3(1390), ADRA1B(1411), GRIA4(1450), DRD2(1483), FZD3(1526), LEPR(1546), CACNA1C(1622), CRHR1(1677), HTR2C(1699), PSMD9(1713), DRD3(1867), OLIG2(1916), CD3E(1919), GRIN1(1941)                                                                                                                                                                                                                                                                                                                                       |
| CACNA1C | 0.005107 | ITPR1(77), KCNC2(91), ADRA1A(175), HTR3A(196), GRIN2D(226), GRIA4(229), GRM7(236), GRIA3(237), CAMKK2(274), GRIN2C(284), HTR3B(322), GRIN1(327), PDE1A(328), GRIN2A(332), ADRB1(334), ADRA1B(336), GABRA6(342), P2RX4(361), GRIN2B(370), ANK3(373), GRIA1(374), GRIA2(414), ADRA2B(432), GNAS(443), GRIN3A(471), GABRA3(482), ADCY9(491), TNF(533), CHRNA7(624), ADRA2C(631), AGTR1(648), ADRA2A(678), P2RX7(683), GABBR1(704), GABRA5(711), PSMB4(719), IL6(746), TH(752), GRIK2(838), GRIK3(846), ESR1(861), PLA2G4A(897), AKT1(898), FGFR2(940), CHRM2(945), IL1B(991), GRIK5(996), NOS1(1007), DRD1(1110), PRKCH(1118), MYO5B(1183), AVPR1A(1200), HTR2B(1207), GRIK1(1221), PSMD9(1230), HTR1A(1259), CREB1(1320), NFKB1(1398), HTR5A(1411), HTR2A(1414), ESR2(1419), TACR1(1422), NOS3(1430), GRIK4(1522), SLC6A1(1556), VGLL4(1563), SERPINA3(1564), TAC1(1597), NR3C1(1628), ADORA2A(1637), HTR4(1708), DRD2(1713), MMP2(1719), PLA2G2A(1785), POMC(1805), HTR6(1858), HTR2C(1882), HTR7(1938), FGFR1(1967) |
| AKT1    | 0.005138 | GSK3B(23), GSK3A(54), NFKB1(64), TNF(130), STAT3(149), PRKCH(217), IL6(218), CREB1(233), DUSP6(245), IL1B(377), NOS3(425), ESR1(440), FGFR2(480), CAMKK2(490), ADRA1A(550), FGFR1(568), ADRB1(589), MMP2(666), CCND2(703),                                                                                                                                                                                                                                                                                                                                                                                                                                                                                                                                                                                                                                                                                                                                                                                          |

|       |          |                                                                                                                                                                                                                                                                                                                                                                                                                                                                                                                                                                                                 |
|-------|----------|-------------------------------------------------------------------------------------------------------------------------------------------------------------------------------------------------------------------------------------------------------------------------------------------------------------------------------------------------------------------------------------------------------------------------------------------------------------------------------------------------------------------------------------------------------------------------------------------------|
|       |          | ITPR1(769), AGTR1(774), TH(791), NR3C1(832), ROS1(871), FGFR3(913), LEPR(932), FGFR4(941), PSMD9(942), NGFR(987), AR(996), NOS1(1037), CACNA1C(1137), LEP(1147), PLA2G4A(1150), ESR2(1181), DRD1(1192), ADRA1B(1219), CCL2(1319), ADRA2B(1414), ADORA2A(1455), CCKBR(1464), GNAS(1465), LRP1(1489), TACR1(1583), POMC(1594), ABCB1(1612), P2RX7(1659), TAC1(1692), CD3E(1734), NTRK2(1767), PTPRR(1835), ADRA2A(1847), DRD2(1916), SERPINA3(1944), CRHR1(1980), TCF20(1981)                                                                                                                     |
| OLIG2 | 0.006925 | OLIG1(1), OLIG3(2), FGFR2(258), TH(328), FGFR1(478), GAD1(500), NGFR(543), FGFR3(594), CCND2(628), TNF(685), ROS1(781), IL6(849), CNTF(853), AKT1(888), STAT3(889), FZD3(975), NTRK3(994), PSMD9(1039), CREB1(1052), GSK3B(1106), GRIA3(1156), NFKB1(1159), BDNF(1184), FGFR4(1226), PENK(1341), TAC1(1424), IL1B(1433), TACR1(1459), ESR1(1516), NTRK2(1617), GRIN1(1655), POMC(1715), NR3C1(1798), GRIK4(1807), GRIA1(1824), CD3E(1869), DUSP6(1961), GRIN2C(1971)                                                                                                                            |
| GSK3B | 0.008616 | GSK3A(1), AKT1(5), NFKB1(165), CREB1(281), TNF(311), ROS1(375), PRKCH(385), IL6(434), DUSP6(444), FGFR2(461), NOS1(497), STAT3(513), CAMKK2(547), IL1B(621), TH(630), NOS3(639), ADRB1(687), CCND2(740), ESR1(795), FZD3(864), FGFR1(931), PSMD9(946), FGFR3(1038), NR3C1(1149), ITPR1(1154), DRD1(1333), ADRA1A(1347), GNAS(1441), AR(1505), ESR2(1675), NGFR(1768), FGFR4(1788), ADRA2B(1822), CACNA1C(1844), PSMB4(1889), LEPR(1907), POMC(1924), MMP2(1955)                                                                                                                                 |
| FGFR3 | 0.013505 | FGFR2(1), FGFR1(2), FGFR4(3), ROS1(146), GNAS(287), DUSP6(298), AKT1(351), TH(414), STAT3(447), IL6(491), TNF(527), ESR1(626), GSK3B(721), NR3C1(887), OLIG1(968), ITPR1(977), NGFR(1025), AR(1053), CCND2(1061), ADRA2B(1183), AGTR1(1282), GRIA3(1339), IL1B(1340), HTR2B(1348), NFKB1(1353), GSK3A(1374), FZD3(1403), HTR3A(1469), DRD1(1477), ADRB1(1676), ESR2(1704), DRD2(1882), LEPR(1884), DRD3(1927), GRIA4(1955), ADRA1A(1962), CCKBR(1963), CREB1(1977)                                                                                                                              |
| PRKCH | 0.018319 | AKT1(48), DGKH(114), CD3E(150), TNF(152), GSK3B(158), NFKB1(190), IL6(244), GSK3A(251), CREB1(334), IL1B(346), DUSP6(396), CAMKK2(418), STAT3(446), FGFR2(462), ADRA1A(482), CACNA1C(498), ESR1(617), CCND2(675), ITPR1(689), FGFR1(705), ADCY9(732), FGFR4(747), PSMD9(791), ROS1(886), TH(960), NR3C1(978), OPRD1(1060), MMP2(1096), CCL2(1143), ADRB1(1238), GNAS(1446), FGFR3(1470), PLA2G4A(1481), TCF20(1499), ESR2(1508), GRIA4(1581), ADRA1B(1618), ABCB1(1654), PSMB4(1685), GRIN2C(1704), POMC(1849), AGTR1(1856), ADRA2B(1875), GRM7(1882), GRIN2D(1929), LEPR(1949), SERPINA3(1987) |
| PDE9A | 0.01933  | PDE11A(1), PDE5A(2), PDE10A(4), PDE2A(6), PDE1A(10), PDE6C(18), ADCY9(120), GRIA4(644), PHACTR3(725), GNAS(888), CACNA1C(1002), PSMB4(1028), ADRA2B(1041), ITPR1(1343), HTR5A(1480), GRIA3(1611), ACSL4(1639), FGFR2(1772)                                                                                                                                                                                                                                                                                                                                                                      |
| OLIG1 | 0.023419 | OLIG2(1), OLIG3(2), FGFR2(187), FGFR1(296), FGFR3(390), TH(425), NGFR(441), GAD1(654), FGFR4(754), CCND2(834), NTRK3(922), ROS1(958), FZD3(1061), TNF(1109), GRIA3(1223), CNTF(1411), BDNF(1471), IL6(1489), PSMD9(1496), CREB1(1555), STAT3(1629), NTRK2(1710), PENK(1751), GSK3B(1792), GRIK4(1945), NFKB1(1947), AKT1(1981)                                                                                                                                                                                                                                                                  |
| OLIG3 | 0.036708 | OLIG2(1), OLIG1(2), TH(379), FGFR2(400), GAD1(494), NGFR(567), NTRK3(571), GRIA3(685), FGFR1(763), FGFR3(878), ADRA2C(898), CCND2(976), ROS1(995), TACR1(1059), GRIN2D(1122), PENK(1150), BDNF(1225), FZD3(1236), NTRK2(1280), HTR3A(1298), TAC1(1364), NOS1(1398), GRIA1(1429), GRIN2C(1433), CREB1(1440), FGFR4(1457), NFE2L3(1466), GRIA4(1473), CNTF(1492), GRIN1(1524), GABBR1(1541), DUSP6(1587), ADRA2B(1627), PSMD9(1675), ITPR1(1719), GSK3B(1781), TNF(1864),                                                                                                                         |



|       |          |                                                                                                                                                                                                                                                                                                                                                                                                                                                                                                                                                                                                                                                                           |
|-------|----------|---------------------------------------------------------------------------------------------------------------------------------------------------------------------------------------------------------------------------------------------------------------------------------------------------------------------------------------------------------------------------------------------------------------------------------------------------------------------------------------------------------------------------------------------------------------------------------------------------------------------------------------------------------------------------|
|       |          | GRIK4(1866), CACNA1C(1919), STAT3(1924), ADRA1B(1963)                                                                                                                                                                                                                                                                                                                                                                                                                                                                                                                                                                                                                     |
| CD3E  | 0.055695 | CTLA4(133), PRKCH(191), TNF(245), TBX21(320), IL6(336), GRIN2D(382), NFKB1(475), IL1B(492), OPRD1(545), GRIN2C(559), NR3C1(595), AKT1(619), FGFR2(662), ROS1(879), PSMD9(882), ESR1(893), FGFR1(970), TH(972), GRIN2A(976), GNAS(1030), GABRA6(1033), PENK(1080), PSMB4(1131), ADRB1(1212), STAT3(1321), CCND2(1395), TACR1(1419), ADRA2B(1539), LRP1(1569), GSK3B(1574), FGFR3(1602), POMC(1633), ABCB1(1643), GRIA3(1661), GRIN2B(1699), CREB1(1725), ESR2(1750), APOE(1787), LEPR(1805), GABRA3(1843), ITPR1(1859), OPRK1(1861), ADRA1A(1979), GRIN1(1989)                                                                                                             |
| FGFR2 | 0.063011 | FGFR1(1), FGFR3(5), FGFR4(11), ROS1(149), DUSP6(290), TH(496), AKT1(610), GNAS(682), ESR1(856), TNF(888), OLIG1(949), NR3C1(975), IL6(1075), GSK3B(1120), HTR2B(1121), CCND2(1158), AR(1199), STAT3(1259), FZD3(1298), ITPR1(1301), ADRA2B(1307), NGFR(1354), GRIA3(1631), NFKB1(1708), CREB1(1828), AGTR1(1838), PSMD9(1853), HTR3A(1869), ADRA1A(1911), DRD1(1915), GSK3A(1990), ESR2(1995)                                                                                                                                                                                                                                                                             |
| GSK3A | 0.078033 | GSK3B(1), AKT1(11), CAMKK2(267), PRKCH(311), DUSP6(385), FGFR2(454), NOS1(465), TNF(479), NFKB1(492), ROS1(545), NOS3(558), CREB1(574), IL6(634), GNAS(672), PSMD9(682), TH(774), STAT3(830), ADRB1(975), FGFR1(1001), FGFR3(1114), IL1B(1163), PSMB4(1210), ESR1(1287), MYO5B(1320), CACNA1C(1347), ITPR1(1432), ADRA1A(1476), PTPRR(1531), NR3C1(1672), LEPR(1788), CCND2(1863), SERPINA3(1903), FGFR4(1908)                                                                                                                                                                                                                                                            |
| DUSP6 | 0.081729 | PTPRR(27), FGFR1(77), AKT1(85), FGFR2(89), GSK3B(267), FGFR4(290), FGFR3(313), NFKB1(323), GSK3A(398), ROS1(461), TNF(465), PRKCH(500), STAT3(550), TH(624), IL6(842), CREB1(849), PSMD9(892), AGTR1(909), PHACTR3(979), IL1B(1220), ESR1(1254), CCND2(1283), MMP2(1383), NR3C1(1621), ITPR1(1804), CAMKK2(1920)                                                                                                                                                                                                                                                                                                                                                          |
| PAM   | 0.118665 | GNAS(54), TNF(71), SERPINA3(170), POMC(205), CACNA1C(247), ADRA1A(274), TH(301), ADRA2B(341), ESR1(490), PENK(548), ADRA1B(590), PSMB4(634), PSMD9(772), FGFR2(978), ANK3(1085), GRIA4(1106), IL6(1197), ADRA2C(1259), ITPR1(1670), MYO5B(1761), PDE1A(1818), CCKBR(1847), ADRA2A(1978)                                                                                                                                                                                                                                                                                                                                                                                   |
| CD47  | 0.161446 | TNF(81), IL6(178), AKT1(223), IL1B(330), NFKB1(362), CD3E(447), FGFR2(495), LRP1(537), CTLA4(590), ESR1(638), ADRB1(665), ITPR1(749), FGFR1(778), NR3C1(792), MMP2(829), GSK3B(830), GNAS(841), STAT3(866), ADRA1A(914), ROS1(925), CREB1(931), TH(956), ANK3(979), CACNA1C(1008), PSMD9(1027), ADRA2B(1032), CCL2(1065), ABCB1(1096), ADRA1B(1144), GRIA3(1234), GRIA4(1250), GRIA1(1302), AGTR1(1323), POMC(1440), LEPR(1453), DRD1(1465), SERPINA3(1482), FGFR3(1497), GYPA(1520), P2RX7(1544), TACR1(1573), ESR2(1588), PRKCH(1611), ADRA2A(1707), TAC1(1732), FGFR4(1736), PSMB4(1742), HTR3A(1826), GRIN1(1830), NGFR(1831), MYO5B(1835), ADORA2A(1848), PENK(1962) |
| FKBP5 | 0.169217 | NR3C1(17), AR(124), ESR1(241), NFKB1(403), FGFR2(548), ABCB1(565), TNF(598), ADCY9(649), PSMD9(765), IL6(813), PSMB4(851), ADRA2B(890), ITPR1(931), GNAS(1085), ESR2(1133), TCF20(1144), ADRA1A(1170), AKT1(1200), ADRB1(1312), LRP1(1615), CREB1(1639), MYO5B(1645), GRIA4(1734), FGFR1(1779), IL1B(1905), HTR3A(1923)                                                                                                                                                                                                                                                                                                                                                   |
| TFCP2 | 0.277285 | NFKB1(101), LBP(156), TCF20(235), TNF(324), PSMD9(344), NFE2L3(464), FGFR2(638), CREB1(655), PSMB4(693), NR3C1(745), IL6(930), ESR1(1027), IL1B(1039), SERPINA3(1139), ADRA1A(1326), GNAS(1445), TH(1710), APOE(1734), STAT3(1806), FGFR1(1860), FGFR4(1881)                                                                                                                                                                                                                                                                                                                                                                                                              |
| DDC   | 0.287916 | GAD1(12), TH(13), ROS1(181), SLC6A4(451), DRD3(534), DRD1(537), DRD2(553),                                                                                                                                                                                                                                                                                                                                                                                                                                                                                                                                                                                                |

|        |          |                                                                                                                                                                                                                                                                                                                                                                                                                                                                                     |
|--------|----------|-------------------------------------------------------------------------------------------------------------------------------------------------------------------------------------------------------------------------------------------------------------------------------------------------------------------------------------------------------------------------------------------------------------------------------------------------------------------------------------|
|        |          | DRD5(665), HTR2B(772), FGFR2(775), HTR1A(950), HTR2A(976), TPH2(1101), GNAS(1179), SLC6A3(1281), TDRD3(1353), HTR2C(1412), ADRA2B(1470), GRIA3(1499), HTR1B(1711), TPH1(1743), HTR6(1767), HTR3A(1853), HTR5A(1864)                                                                                                                                                                                                                                                                 |
| CAMKK2 | 0.321022 | PDE1A(29), CACNA1C(63), CREB1(73), ITPR1(119), AKT1(123), GSK3A(226), GSK3B(236), PRKCH(354), GRM7(424), ADCY9(476), ADRA1A(482), GRIA1(576), ADRB1(600), TNF(866), PDE2A(918), PSMB4(921), DUSP6(930), NFKB1(1045), GRIN1(1048), PLA2G4A(1083), PSMD9(1113), ROS1(1231), GNAS(1293), GRIA3(1294), GRIA4(1311), PTPRR(1372), ADRA1B(1378), FGFR2(1408), STAT3(1473), ESR1(1476), NOS1(1482), IL1B(1502), GRIN2B(1516), TH(1557), FGFR1(1565), ADRA2B(1686), ESR2(1820), NTRK2(1979) |
| FZD3   | 0.330747 | DTNBP1(64), DAOA(75), FGFR2(200), DISC1(320), GSK3B(339), HTR2A(438), HTR5A(571), GRIA4(633), ROS1(666), FGFR3(739), HTR6(757), FGFR1(767), TH(791), DRD3(804), GAD1(818), GRIK4(908), IL6(909), GRIK3(925), ADRA2B(968), TNF(995), GNAS(1037), FGFR4(1124), GMIP(1279), GRIA3(1353), DRD2(1374), ESR1(1387), CHRFAM7A(1425), ITPR1(1537), IL1B(1542), SYN3(1564), DRD1(1654), GABRA3(1658), GNAL(1659), DUSP6(1823), HTR2B(1895), TPH2(1915), HTR1A(1933), ADRB1(1986)             |
| WFS1   | 0.378286 | DTNBP1(168), GNAS(184), FGFR2(323), ESR1(344), TPH2(389), FGFR3(407), SLC6A4(437), IL6(473), LEPR(485), TNF(514), DAOA(557), ESR2(661), ACSL4(723), IL1B(776), PSMD9(807), HTR2A(823), GNB3(914), CTLA4(934), TH(953), ADRA2B(992), ABCB1(1096), APOE(1114), CACNA1C(1198), ITPR1(1294), GAD1(1314), TPH1(1370), ADRB1(1398), GRIK3(1468), POMC(1722), SLC6A2(1726), AR(1733), NR3C1(1801), DRD4(1859), ADCY9(1903), LEP(1909), FZD3(1941), MTHFR(1954)                             |
| NFE2L3 | 0.543003 | NFKB1(43), TFCP2(96), TNF(167), TCF20(172), CREB1(357), FGFR2(659), ESR1(942), NR3C1(1033), IL6(1320), PSMD9(1345), STAT3(1551), FGFR1(1680), FBXO8(1767), PSMB4(1831), AKT1(1958)                                                                                                                                                                                                                                                                                                  |
| BCR    | 0.639547 | AKT1(200), TNF(323), CCND2(331), IL6(339), NFKB1(373), STAT3(408), FGFR2(410), ROS1(434), TH(453), FGFR1(550), FGFR3(732), GSK3B(763), GNAS(784), IL1B(890), ABCB1(955), FGFR4(1094), NR3C1(1254), ESR1(1291), CREB1(1375), GSK3A(1583), PSMD9(1597), DUSP6(1613), PRKCH(1727), ITPR1(1733), PTPRR(1964), CD3E(1992), SERPINA3(1996)                                                                                                                                                |
| PTPRR  | 0.660664 | DUSP6(37), TH(198), ROS1(251), FGFR1(293), FGFR2(326), PHACTR3(329), AKT1(344), GSK3A(516), GSK3B(533), NGFR(570), FGFR4(631), FGFR3(659), STAT3(843), NR3C1(844), PRKCH(857), NTRK3(970), CAMKK2(1079), NTRK2(1110), PDE9A(1255), CREB1(1288), ITPR1(1390), CACNA1C(1561), GRIA4(1780), TCF20(1871), PSMB4(1914)                                                                                                                                                                   |
| UGT2A1 | 0.698515 | GNAL(331), ADCY9(473), CYP2C9(506), GAD1(666), TH(738), ABCB1(826), PDE9A(1208), PENK(1597), HTR5A(1607), GNAS(1662), PDE1A(1834), FGFR2(1990)                                                                                                                                                                                                                                                                                                                                      |
| DGKH   | 0.810725 | PRKCH(11), NR3C1(21), ANK3(255), EHD3(276), CAMKK2(605), CD3E(672), CACNA1C(707), AKT1(800), PSMB4(813), FKBP5(961), PDE9A(1042), FBXO8(1153), PDE1A(1299), ITPR1(1316), FGFR2(1409), MYO5B(1527), ROS1(1598), ADCY9(1631), GSK3B(1866), PSMD9(1924), PDE11A(1961), GSK3A(1983)                                                                                                                                                                                                     |
| ACSL4  | 0.94727  | IL6(491), PLA2G4A(531), TNF(664), LEPR(707), GNAS(762), OASL(792), WFS1(886), TH(895), FGFR2(907), PDE1A(1005), ITPR1(1034), PLA2G2A(1117), GRIA3(1204), PDE9A(1305), IL1B(1306), ADRA2B(1354), LEP(1450), GRIA4(1470), SERPINA3(1513), FGFR4(1595), NR3C1(1609), APOE(1638), AKT1(1643), POMC(1668), ADCY9(1695), GAD1(1703), ABCB1(1787), ESR1(1810), GABRA6(1829)                                                                                                                |
| DNAJB2 | 0.956022 | PSMB4(125), BDNF(214), PSMD9(244), FBXO8(732), PHACTR3(1346), MYO5B(1772), TCF20(1948)                                                                                                                                                                                                                                                                                                                                                                                              |

|          |          |                                                                                                                                                                                                                                                |
|----------|----------|------------------------------------------------------------------------------------------------------------------------------------------------------------------------------------------------------------------------------------------------|
| PSMD9    | 0.959184 | PSMB4(12), TDRD3(365), CCND2(819), FBXO8(1749)                                                                                                                                                                                                 |
| GYPA     | 0.971885 | GNAS(132), TNF(778), FGFR2(841), CACNA1C(918), ADRA2B(928), SERPINA3(1050), PSMB4(1276), IL6(1444), PHACTR3(1498), ABCB1(1622), MYO5B(1673)                                                                                                    |
| TCF20    | 0.97278  | ESR1(8), ESR2(157), CREB1(763), FGFR2(1270), PSMD9(1395), TFCP2(1578)                                                                                                                                                                          |
| HS6ST3   | 0.989407 | CHST11(14), MYO5B(571), FGFR2(572), ANK3(1481), ESR1(1539), IL6(1573), FGFR1(1869)                                                                                                                                                             |
| VGLL4    | 0.991709 | ADRA1A(382), ADRB1(509), ADRA1B(570), FBXO8(753), ADRA2B(913), ADRA2C(1423), ADRA2A(1786), TDRD3(1923)                                                                                                                                         |
| PSMB4    | 0.992859 | PSMD9(30), TDRD3(856), GRIN3A(1593), FBXO8(1930)                                                                                                                                                                                               |
| PCLO     | 0.992954 | GRM7(133), GRIK3(244), GRIA1(259), GRIA3(329), SYN3(587), MYO5B(607), GABBR1(709), SLC6A1(748), ITPR1(1017), GRIK1(1022), GAD1(1162), PSMD9(1221), CACNA1C(1265), GRIA4(1536), PHACTR3(1582), GRIK5(1607), ANK3(1628), EHD3(1665), GRIA2(1784) |
| TSPAN8   | 0.993857 | ADRA1A(130), HTR1A(629), FGFR2(637), TNF(925), FGFR4(1106), PSMB4(1648), PDE1A(1669), AGTR1(1848), ABCB1(1872)                                                                                                                                 |
| OASL     | 0.99422  | FBXO8(274), PSMB4(446), HTR5A(641), ACSL4(829), PSMD9(1537), MYO5B(1996)                                                                                                                                                                       |
| ANK3     | 0.994545 | CACNA1C(87), ITPR1(375), ROS1(399), KCNC2(486), MYO5B(609), GNAS(687), FGFR2(845), GRIA4(888), GRIA3(967), HTR3A(1415), PSMD9(1862), TH(1997)                                                                                                  |
| SPAG16   | 0.995349 | ROS1(325), PDE1A(373), GNAS(758), FGFR2(887), PSMD9(1129), FBXO8(1239), TH(1627), AR(1675)                                                                                                                                                     |
| ROS1     | 0.9967   | FGFR2(168), TH(391), FGFR3(539), GSK3B(672), FGFR1(701), DDC(792), AKT1(1057), ANK3(1363), ITPR1(1524), DUSP6(1549), GSK3A(1798), GRIA3(1812), GNAS(1869), PTPRR(1893)                                                                         |
| CHST11   | 0.9985   | HS6ST3(41), TDRD3(637), FGFR2(1276), PHACTR3(1516)                                                                                                                                                                                             |
| EHD3     | 0.999676 | MYO5B(138), PSMD9(880), ANK3(981), TCF20(1117), FBXO8(1535), FGFR2(1642), AKT1(1951)                                                                                                                                                           |
| MYO5B    | 0.999788 | SLC25A21(865), PSMD9(916), EHD3(927), PSMB4(1093), GRIA3(1572), ANK3(1938), GAD1(1942)                                                                                                                                                         |
| SLC25A21 | 0.999836 | TDRD3(130), MYO5B(1733)                                                                                                                                                                                                                        |
| PHACTR3  | 0.999934 | TDRD3(189)                                                                                                                                                                                                                                     |
| ZNF804A  | 0.99997  | CNR1(678), TDRD3(778)                                                                                                                                                                                                                          |
| GMIP     | 0.999989 | DTNBP1(823), FZD3(883), CTLA4(1202), HTR2A(1701), DAOA(1798)                                                                                                                                                                                   |
| SMG7     | 0.999996 | PSMD9(951), MYO5B(1460), FBXO8(1596), PSMB4(1674)                                                                                                                                                                                              |
| C5orf20  | 0.999999 | PHACTR3(1048), ZNF804A(1830), VGLL4(1894)                                                                                                                                                                                                      |
| TDRD3    | 1        | PHACTR3(1305), SLC25A21(1889)                                                                                                                                                                                                                  |
| FBXO8    | 1        | TDRD3(1798)                                                                                                                                                                                                                                    |

**Table S3.3.** List of 178 GO (<http://www.geneontology.org>) gene sets compiled based on GRAIL functional keywords for MDD. Gene sets with at least 5 genes were listed (GO downloaded date: Sep/21/2011).

|                                                                                                                                                                                                                                                                          |
|--------------------------------------------------------------------------------------------------------------------------------------------------------------------------------------------------------------------------------------------------------------------------|
| <b>Keyword: serotonin</b>                                                                                                                                                                                                                                                |
| GO:0004993 (13 genes) HTR2C(3358), HTR1D(3352), HTR2B(3357), HTR1F(3355), HTR4(3360), HTR1A(3350), HTR1B(3351), HTR1E(3354), HTR5A(3361), HTR7(3363), HTR3B(9177), HTR3A(3359), HTR2A(3356),                                                                             |
| GO:0005232 (5 genes) HTR3D(200909), HTR3C(170572), HTR3E(285242), HTR3B(9177), HTR3A(3359),                                                                                                                                                                              |
| GO:0007210 (13 genes) HTR2C(3358), HTR1D(3352), HTR2B(3357), HTR1F(3355), HTR4(3360), HTR1A(3350), HTR1B(3351), HTR1E(3354), HTR5A(3361), HTR7(3363), HTR3B(9177), HTR3A(3359), HTR2A(3356),                                                                             |
| GO:0042428 (6 genes) MAOA(4128), ATP7A(538), ATP2B2(491), SRD5A1(6715), PDE1B(5153), GRIN2A(2903),                                                                                                                                                                       |
| GO:0051378 (9 genes) HTR2C(3358), MAOA(4128), HTR2B(3357), HTR1F(3355), HTR1A(3350), HTR1B(3351), HTR1E(3354), HTR3A(3359), HTR2A(3356),                                                                                                                                 |
| <b>Keyword: glutamate</b>                                                                                                                                                                                                                                                |
| GO:0004970 (10 genes) GRIA3(2892), GRIK3(2899), GRIA2(2891), GRID2(2895), GRIA1(2890), GRIK2(2898), GRIN1(2902), GRID1(2894), GRIN2A(2903), GRIK1(2897),                                                                                                                 |
| GO:0004972 (6 genes) GRIN3A(116443), GRIN1(2902), GRIN2B(2904), GRIN2A(2903), GRIN2C(2905), GRIN2D(2906),                                                                                                                                                                |
| GO:0005234 (18 genes) GRIA3(2892), GRIK3(2899), GRIA2(2891), GRID2(2895), GRIA1(2890), GRIK2(2898), GRIN3A(116443), GRIN1(2902), GRID1(2894), GRIA4(2893), GRIK4(2900), GRIN2B(2904), STX1B(112755), GRIN2A(2903), GRIN2C(2905), GRIK5(2901), GRIN2D(2906), GRIK1(2897), |
| GO:0005313 (11 genes) SLC1A7(6512), SLC25A12(8604), SLC1A3(6507), SLC25A13(10165), SLC1A1(6505), SLC17A6(57084), SLC1A2(6506), SLC25A22(79751), SLC17A8(246213), SLC1A6(6511), SLC17A7(57030),                                                                           |
| GO:0005314 (5 genes) SLC1A7(6512), SLC1A3(6507), SLC1A1(6505), SLC1A2(6506), SLC1A6(6511),                                                                                                                                                                               |
| GO:0006536 (9 genes) GLUD2(2747), GCLM(2730), AADAT(51166), ALDH5A1(7915), GCLC(2729), GOT1(2805), GOT2(2806), TAT(6898), NAGS(162417),                                                                                                                                  |
| GO:0006537 (5 genes) GLUD2(2747), SLC1A3(6507), GLUD1(2746), PRODH2(58510), PRODH(5625),                                                                                                                                                                                 |
| GO:0007215 (13 genes) GRIA3(2892), GRIK3(2899), GRID2(2895), GRIK2(2898), GNAQ(2776), GRIA4(2893), GRIK4(2900), GRIN2B(2904), SSTR1(6751), GRIN2A(2903), GRIN2C(2905), PLCB1(23236), GRIK1(2897),                                                                        |
| GO:0008066 (12 genes) GRIK3(2899), GRM2(2912), GRM7(2917), GRIA2(2891), GRID2(2895), GRIA1(2890), GRM6(2916), GRM1(2911), GRM4(2914), GRM8(2918), GRM3(2913), GRM5(2915),                                                                                                |
| GO:0014047 (17 genes) GLS(2744), GRM2(2912), CPLX1(10815), RIMS1(22999), STX1A(6804), STXBP1(6812), NTRK2(4915), BDNF(627), SLC38A2(54407), GLS2(27165), SYT1(6857), TRPV1(7442), VAMP2(6844), GIPC1(10755), RAB3A(5864), SLC17A7(57030), SNAP25(6616),                  |
| GO:0014049 (7 genes) AVPR1B(553), NR3C1(2908), DPYSL2(1808), GRIN2B(2904), AVPR1A(552), AVP(551), ADORA2A(135),                                                                                                                                                          |
| GO:0014050 (5 genes) ADORA1(134), IL1B(3553), TRH(7200), GRM7(2917), NPY5R(4889),                                                                                                                                                                                        |
| GO:0015277 (7 genes) GRIK3(2899), GRIA2(2891), GRIA1(2890), GRIK2(2898), GRIK4(2900), GRIK5(2901), GRIK1(2897),                                                                                                                                                          |
| GO:0015813 (12 genes) PRAF2(11230), SLC1A7(6512), SLC25A12(8604), ARL6IP5(10550), SLC1A3(6507), SLC25A13(10165), SLC1A1(6505), SLC1A2(6506), SLC25A22(79751), PSEN1(5663), SLC1A6(6511), SLC17A7(57030),                                                                 |
| GO:0016595 (9 genes) CPS1(1373), GRM7(2917), SLC1A3(6507), GCLC(2729), GRIN1(2902), SLC1A1(6505), GRIN2A(2903), GRIN2D(2906), GRIK1(2897),                                                                                                                               |
| GO:0017146 (7 genes) GRIN3A(116443), GRIN1(2902), GRIN2B(2904), EPS8(2059), GRIN2A(2903), GRIN2C(2905), GRIN2D(2906),                                                                                                                                                    |

|                                                                                                                                                                                                                                            |
|--------------------------------------------------------------------------------------------------------------------------------------------------------------------------------------------------------------------------------------------|
| GO:0032281 (13 genes) GRIA3(2892), CNIH3(149111), GRIA2(2891), GRIA1(2890), GRIA4(2893), CNIH2(254263), CACNG3(10368), CACNG5(27091), CACNG4(27092), DLG4(1742), CACNG7(59284), CACNG8(59283), CACNG2(10369),                              |
| GO:0035235 (9 genes) GRIN3A(116443), GRIN1(2902), GRIN2B(2904), CLN3(1201), GRIN2A(2903), CDK5R1(8851), ATP1A3(478), APP(351), GRIK1(2897),                                                                                                |
| GO:0035249 (16 genes) SLC1A4(6509), GRID2(2895), ADRB2(154), PARK2(5071), GRM8(2918), CDK5(1020), PLAT(5327), GRIN1(2902), UNC13B(10497), SHC3(53358), CNIH2(254263), P2RX1(5023), CACNA1A(773), UNC13A(23025), GRIN2D(2906), NAPB(63908), |
| GO:0035254 (5 genes) ATP2B2(491), CAMK2A(815), RASGRF1(5923), C16orf70(80262), GRIN2A(2903),                                                                                                                                               |
| GO:0035255 (14 genes) OPHN1(4983), DLG3(1741), RAB4A(5867), CTNNB1(1499), ADRB2(154), CANX(821), DRD2(1813), SHANK2(22941), GRIN2B(2904), DLG4(1742), MYO5B(4645), SHANK1(50944), GNAS(2778), SHANK3(85358),                               |
| GO:0051966 (9 genes) OPHN1(4983), SERPINE2(5270), UCN(7349), GRM1(2911), CNR1(1268), PSEN1(5663), PRKACA(5566), GRIK1(2897), MAPK8IP2(23542),                                                                                              |
| GO:0051967 (7 genes) ADORA1(134), GRIK3(2899), GRIK2(2898), HTR1B(3351), DRD2(1813), HTR2A(3356), GRIK1(2897),                                                                                                                             |
| GO:0051968 (12 genes) TNR(7143), PTGS2(5743), NRXN1(9378), NLGN1(22871), OXTR(5021), DRD1(1812), NTRK2(4915), GRIA4(2893), CCKBR(887), NLGN2(57555), ADORA2A(135), SHANK3(85358),                                                          |
| GO:0060203 (5 genes) SYT1(6857), ATP6V0D1(9114), VAMP2(6844), RAB3A(5864), SLC17A7(57030),                                                                                                                                                 |
|                                                                                                                                                                                                                                            |
| <b>Keyword: dopamine</b>                                                                                                                                                                                                                   |
| GO:0001963 (10 genes) DRD3(1814), SNCA(6622), DRD5(1816), DRD1(1812), CDK5(1020), DRD2(1813), TH(7054), DRD4(1815), ADORA2A(135), RASD2(23551),                                                                                            |
| GO:0004952 (5 genes) DRD3(1814), DRD5(1816), DRD1(1812), DRD2(1813), DRD4(1815),                                                                                                                                                           |
| GO:0007191 (7 genes) DRD3(1814), ADCY5(111), DRD5(1816), DRD1(1812), SLC9A3R1(9368), GNAL(2774), GNAS(2778),                                                                                                                               |
| GO:0007195 (5 genes) FLNA(2316), DRD3(1814), ADCY5(111), DRD2(1813), DRD4(1815),                                                                                                                                                           |
| GO:0007212 (6 genes) D4S234E(27065), HMP19(51617), CALY(50632), DRD4(1815), GNAO1(2775), RGS9(8787),                                                                                                                                       |
| GO:0014059 (9 genes) CHRN2(1141), DRD3(1814), SNCA(6622), HTR1B(3351), CHRNA6(8973), SNCG(6623), DRD2(1813), HTR2A(3356), CHRNA4(1137),                                                                                                    |
| GO:0033603 (5 genes) CHRN2(1141), PINK1(65018), RTN4(57142), GDNF(2668), SLC18A1(6570),                                                                                                                                                    |
| GO:0035240 (8 genes) GPR143(4935), DRD5(1816), SLC6A3(6531), ADRB2(154), DRD1(1812), ADRB1(153), TH(7054), DRD4(1815),                                                                                                                     |
| GO:0042053 (7 genes) CHRN2(1141), NR4A2(4929), TACR3(6870), SLC6A3(6531), DRD1(1812), DRD4(1815), PDE1B(5153),                                                                                                                             |
| GO:0042416 (8 genes) TGFB2(7042), NR4A2(4929), SNCA(6622), SLC6A3(6531), DDC(1644), TH(7054), GCH1(2643), CHRNA7(1139),                                                                                                                    |
| GO:0042417 (10 genes) ATP7A(538), NPR1(4881), DRD3(1814), SNCAIP(9627), DRD1(1812), SNCB(6620), PARK2(5071), DRD2(1813), DRD4(1815), GRIN2A(2903),                                                                                         |
| GO:0060158 (8 genes) DRD5(1816), DRD1(1812), GNA14(9630), GNAQ(2776), DRD2(1813), SLC9A3R1(9368), GNA11(2767), GNA15(2769),                                                                                                                |
| GO:0071542 (5 genes) NR4A2(4929), WNT5A(7474), FGF8(2253), PITX3(5309), LRP6(4040),                                                                                                                                                        |
|                                                                                                                                                                                                                                            |
| <b>Keyword: N-methyl-D-aspartate</b>                                                                                                                                                                                                       |
| GO:0004972 (6 genes) GRIN3A(116443), GRIN1(2902), GRIN2B(2904), GRIN2A(2903), GRIN2C(2905), GRIN2D(2906),                                                                                                                                  |

|                                                                                                                                                                                                                                                                                                                                                                                                                                                                                                                                                                                                                                                                                                                                                                                                                                                                                                                                                                                                              |
|--------------------------------------------------------------------------------------------------------------------------------------------------------------------------------------------------------------------------------------------------------------------------------------------------------------------------------------------------------------------------------------------------------------------------------------------------------------------------------------------------------------------------------------------------------------------------------------------------------------------------------------------------------------------------------------------------------------------------------------------------------------------------------------------------------------------------------------------------------------------------------------------------------------------------------------------------------------------------------------------------------------|
| GO:0017146 (7 genes) GRIN3A(116443), GRIN1(2902), GRIN2B(2904), EPS8(2059), GRIN2A(2903), GRIN2C(2905), GRIN2D(2906),                                                                                                                                                                                                                                                                                                                                                                                                                                                                                                                                                                                                                                                                                                                                                                                                                                                                                        |
| <b>Keyword: neuron</b>                                                                                                                                                                                                                                                                                                                                                                                                                                                                                                                                                                                                                                                                                                                                                                                                                                                                                                                                                                                       |
| GO:0001764 (72 genes) DCX(1641), CDKL5(6792), ARX(170302), CELSR2(1952), CNTN2(6900), MARK1(4139), DISC1(27185), BARHL2(343472), NR4A2(4929), SATB2(23314), DNER(92737), PEX13(5194), CHL1(10752), TOP2B(7155), CCR4(1233), CCK(885), CELSR3(1951), NEUROG2(63973), C4orf31(79625), CCKAR(886), APBB2(323), PHOX2B(8929), ATOH1(474), GFRA3(2676), TLX3(30012), NR2F1(7025), FYN(2534), GJA1(2697), PEX7(5191), KATNA1(11104), DCDC2(51473), KIAA0319(9856), TUBB2B(347733), MDGA1(266727), RELN(5649), NRCAM(4897), MET(4233), FEZF1(389549), CDK5(1020), MNX1(3110), TWIST1(7291), PTK2(5747), FZD3(7976), LMX1B(4010), BARHL1(56751), VAX1(11023), DRGX(644168), PRKG1(5592), ROBO3(64221), PAX6(5080), MARK2(2011), ASCL1(429), NEUROD4(58158), PEX5(5830), GAS6(2621), NKX2-1(7080), PSEN1(5663), ALKBH1(8846), NDN(4692), DYX1C1(161582), NTRK3(4916), NR2F2(7026), YWHAE(7531), PAFAH1B1(5048), CDK5R1(8851), LHX1(3975), ITGA3(3675), NDEL1(81565), MYH10(4628), NTN1(9423), AXL(558), CELSR1(9620), |
| GO:0007158 (11 genes) NLGN3(54413), TNFR(7143), ASTN1(460), NRXN1(9378), NLGN1(22871), CNTN4(152330), CTNND2(1501), NINJ2(4815), CDK5R1(8851), NLGN2(57555), NCAM2(4685),                                                                                                                                                                                                                                                                                                                                                                                                                                                                                                                                                                                                                                                                                                                                                                                                                                    |
| GO:0010975 (6 genes) FRMD7(90167), IL1RAPL1(11141), CCDC88A(55704), PTEN(5728), AKT1(207), NDEL1(81565),                                                                                                                                                                                                                                                                                                                                                                                                                                                                                                                                                                                                                                                                                                                                                                                                                                                                                                     |
| GO:0010976 (33 genes) ABL2(27), SERPINE2(5270), BCL11A(53335), TWF2(11344), WNT5A(7474), EPHA3(2042), C4orf31(79625), FIG4(9896), PTK7(5754), CNR1(1268), MET(4233), PTK2B(2185), FGFR1(2260), UBE2V2(7336), LYN(4067), STMN2(11075), INPP5E(56623), ITGB1(3688), RET(5979), FEZ1(9638), MARK2(2011), PPP2R5B(5526), P2RY2(5029), ATF1(466), AVIL(10677), LTK(4058), NPTN(27020), KATNB1(10300), SCARF1(8578), DCC(1630), ADNP(23394), PTK6(5753), LIF(3976),                                                                                                                                                                                                                                                                                                                                                                                                                                                                                                                                                |
| GO:0010977 (17 genes) TNFR(7143), WNT3A(89780), ITM2C(81618), BCL11A(53335), DGUOK(1716), HDAC2(3066), KATNA1(11104), STMN2(11075), LPAR1(1902), INPPL1(3636), TRPV4(59341), FKBP4(2288), PMP22(5376), PAFAH1B1(5048), GFAP(2670), DCC(1630), LGALS1(3956),                                                                                                                                                                                                                                                                                                                                                                                                                                                                                                                                                                                                                                                                                                                                                  |
| GO:0016322 (8 genes) EPHA8(2046), FARP2(9855), ANKS1A(23294), GNAQ(2776), RND1(27289), NTN4(59277), SCARF1(8578), APP(351),                                                                                                                                                                                                                                                                                                                                                                                                                                                                                                                                                                                                                                                                                                                                                                                                                                                                                  |
| GO:0019228 (11 genes) SCN9A(6335), CHRNA1(1134), KCNMB2(10242), KCNMB3(27094), DRD1(1812), GRIK2(2898), P2RX3(5024), P2RX4(5025), KCNMB4(27345), CHRNA7(1139), P2RX1(5023),                                                                                                                                                                                                                                                                                                                                                                                                                                                                                                                                                                                                                                                                                                                                                                                                                                  |
| GO:0021522 (6 genes) GIGYF2(26058), SOX4(6659), ABT1(29777), MDGA2(161357), CACNA1A(773), NKX2-2(4821),                                                                                                                                                                                                                                                                                                                                                                                                                                                                                                                                                                                                                                                                                                                                                                                                                                                                                                      |
| GO:0021527 (10 genes) PAX7(5081), WNT3A(89780), GDF7(151449), GSX2(170825), MDGA1(266727), ASCL1(429), LHX5(64211), WNT1(7471), GSX1(219409), LHX1(3975),                                                                                                                                                                                                                                                                                                                                                                                                                                                                                                                                                                                                                                                                                                                                                                                                                                                    |
| GO:0021853 (5 genes) ARX(170302), CNTN2(6900), DRD1(1812), LHX6(26468), DRD2(1813),                                                                                                                                                                                                                                                                                                                                                                                                                                                                                                                                                                                                                                                                                                                                                                                                                                                                                                                          |
| GO:0021860 (5 genes) ATP7A(538), ATG7(10533), UQCRCQ(27089), OGDH(4967), FGFR2(2263),                                                                                                                                                                                                                                                                                                                                                                                                                                                                                                                                                                                                                                                                                                                                                                                                                                                                                                                        |
| GO:0021879 (6 genes) DLX1(1745), DLX2(1746), LEF1(51176), OTP(23440), ASCL1(429), LHX5(64211),                                                                                                                                                                                                                                                                                                                                                                                                                                                                                                                                                                                                                                                                                                                                                                                                                                                                                                               |
| GO:0021895 (8 genes) HPRT1(3251), EOMES(8320), NR2E1(7101), ID4(3400), LHX6(26468), PRTFDC1(56952), PEX5(5830), PAFAH1B1(5048),                                                                                                                                                                                                                                                                                                                                                                                                                                                                                                                                                                                                                                                                                                                                                                                                                                                                              |
| GO:0021953 (7 genes) LMX1A(4009), NR4A2(4929), MET(4233), SMO(6608), MNX1(3110), TULP3(7289), BCL11B(64919),                                                                                                                                                                                                                                                                                                                                                                                                                                                                                                                                                                                                                                                                                                                                                                                                                                                                                                 |
| GO:0021954 (13 genes) HPRT1(3251), ATP7A(538), MAP2(4133), NEUROG2(63973), LEP(3952), CDK5(1020), NPY(4852), FGFR1(2260), LMX1B(4010), PRTFDC1(56952), ASCL1(429), FOXG1(2290), LINGO1(84894),                                                                                                                                                                                                                                                                                                                                                                                                                                                                                                                                                                                                                                                                                                                                                                                                               |
| GO:0030182 (81 genes) CHRDL1(91851), SMARCA1(6594), S1PR1(1901), WNT2B(7482), HIPK1(204851), SHC1(6464), EFNA1(1942), EPHA2(1969), RXRG(6258), BTG2(7832), WNT9A(7483), WNT3A(89780), ID3(3399), PCSK9(255738), BARHL2(343472), FZD7(8324), FZD5(7855), WNT6(7475), ITM2C(81618), DPYSL5(56896), SOX11(6664), EMX1(2016), VHL(7428), ATP2B2(491), GATA2(2624), RYK(6259), WNT5A(7474), POU4F2(5458), MEF2C(4208), HDAC2(3066), TUBB(203068), TUBB2A(7280), TUBB2B(347733), POU3F2(5454), WNT2(7472), MTPN(136319), HIPK2(28996),                                                                                                                                                                                                                                                                                                                                                                                                                                                                             |

|                                                                                                                                                                                                                                                                                                                                                                                                                                                                                                                                                                                                                                                                                                                                                                                                                                                                                                                                                                                                                                                                                                                                                                                                                                                                                                                                                                                                                                                                                                                                                                                                                                                                                                                                                                                                                                                                                    |
|------------------------------------------------------------------------------------------------------------------------------------------------------------------------------------------------------------------------------------------------------------------------------------------------------------------------------------------------------------------------------------------------------------------------------------------------------------------------------------------------------------------------------------------------------------------------------------------------------------------------------------------------------------------------------------------------------------------------------------------------------------------------------------------------------------------------------------------------------------------------------------------------------------------------------------------------------------------------------------------------------------------------------------------------------------------------------------------------------------------------------------------------------------------------------------------------------------------------------------------------------------------------------------------------------------------------------------------------------------------------------------------------------------------------------------------------------------------------------------------------------------------------------------------------------------------------------------------------------------------------------------------------------------------------------------------------------------------------------------------------------------------------------------------------------------------------------------------------------------------------------------|
| CDK5(1020), FZD1(8321), GPC2(221914), NRBP2(340371), FZD3(7976), STMN2(11075), LHX2(9355), LMX1B(4010), WNT8B(7479), TLX1(3195), LDB1(8861), PSD(5662), FZD8(8325), DRGX(644168), CHAT(1103), PRKCQ(5588), BTG4(54766), BRSK2(9024), WNT11(7481), FZD4(8322), FZD10(11211), WNT5B(81029), WNT10B(7480), HOXC8(3224), PTPRR(5801), RTN1(6252), MYEF2(50804), ALDH1A2(8854), MAP2K1(5604), NGRN(51335), TUBB3(10381), CDK5R1(8851), FZD2(2535), WNT3(7473), WNT9B(7484), GAS7(8522), ADNP2(22850), DAPK3(1613), BRSK1(84446), NNAT(4826), PIGT(51604), CEBPB(1051), EDN3(1908), WNT7B(7477),                                                                                                                                                                                                                                                                                                                                                                                                                                                                                                                                                                                                                                                                                                                                                                                                                                                                                                                                                                                                                                                                                                                                                                                                                                                                                         |
| GO:0031102 (5 genes) SMO(6608), ADM(133), ULK1(8408), OMG(4974), GFAP(2670),                                                                                                                                                                                                                                                                                                                                                                                                                                                                                                                                                                                                                                                                                                                                                                                                                                                                                                                                                                                                                                                                                                                                                                                                                                                                                                                                                                                                                                                                                                                                                                                                                                                                                                                                                                                                       |
| GO:0031175 (60 genes) L1CAM(3897), UBE4B(10277), NGF(4803), PHGDH(26227), SHC1(6464), UHMK1(127933), BTG2(7832), EPHA8(2046), NCDN(23154), DOCK7(85440), MAP2(4133), EFHD1(80303), SEPT2(4735), UCN(7349), ATG7(10533), RYK(6259), CNTN4(152330), CHL1(10752), LAMB2(3913), PRICKLE2(166336), APC(324), GPRIN1(114787), GDNF(2668), DTNBP1(84062), AGER(177), LAMB1(3912), CNTNAP2(26047), CDK5(1020), IL6(3569), NPY(4852), PPP1R9A(55607), PTK2B(2185), LYN(4067), LGI1(9211), ZFYVE27(118813), STX3(6809), CCDC64(92558), ULK1(8408), HMGB1(3146), ALKBH1(8846), NEDD4(4734), RAB11A(8766), LINGO1(84894), RASGRF1(5923), IGF1R(3480), TBC1D24(57465), GNAO1(2775), CDH1(999), CDK5R1(8851), PLD2(5338), GALR2(8811), RAC3(5881), MYH10(4628), PTPRM(5797), VAPA(9218), PRMT1(3276), NRTN(4902), STMN3(50861), APP(351), ATXN10(25814),                                                                                                                                                                                                                                                                                                                                                                                                                                                                                                                                                                                                                                                                                                                                                                                                                                                                                                                                                                                                                                         |
| GO:0032809 (5 genes) CX3CR1(1524), ADRB2(154), GABRA6(2559), KCNC3(3748), KCNJ6(3763),                                                                                                                                                                                                                                                                                                                                                                                                                                                                                                                                                                                                                                                                                                                                                                                                                                                                                                                                                                                                                                                                                                                                                                                                                                                                                                                                                                                                                                                                                                                                                                                                                                                                                                                                                                                             |
| GO:0042551 (6 genes) NR4A2(4929), RET(5979), CDKN1C(1028), CLN5(1203), IRX5(10265), VSX1(30813),                                                                                                                                                                                                                                                                                                                                                                                                                                                                                                                                                                                                                                                                                                                                                                                                                                                                                                                                                                                                                                                                                                                                                                                                                                                                                                                                                                                                                                                                                                                                                                                                                                                                                                                                                                                   |
| GO:0043005 (75 genes) DCX(1641), FRMD7(90167), BRS3(680), CNKSR2(22866), ATP7A(538), KCND3(3752), S100A4(6275), ATP1A2(477), CACYBP(27101), PTGS2(5743), CAMK1G(57172), EPHA8(2046), KCNQ4(9132), ACOT7(11332), DOCK7(85440), KIF5C(3800), CASP8(841), RTN4(57142), TSGA10(80705), GHSR(2693), CX3CR1(1524), CTNNB1(1499), PTPN13(5783), MYO10(4651), SLC1A3(6507), ITGA1(3672), ARG1(383), ESR1(2099), DTNBP1(84062), PARK2(5071), NRSN1(140767), DAXX(1616), ANKS1A(23294), CPNE5(57699), VGF(7425), NRCAM(4897), GRM8(2918), ADCYAP1R1(117), STX1A(6804), LIMK1(3984), GABBR2(9568), GRIN3A(116443), CTSL2(1515), SLC18A2(6571), KIF5B(3799), HSPA8(3312), TPH1(7166), TH(7054), STX3(6809), KLC2(64837), PPP1CA(5499), FADD(8772), ULK1(8408), GRIN2B(2904), AVIL(10677), TPH2(121278), SYT1(6857), PPM1A(5494), BDKRB1(623), MYO5A(4644), IGF1R(3480), CLN3(1201), CDH13(1012), GRIN2A(2903), ACCN1(40), CYGB(114757), RAC3(5881), SYT4(6860), MARK4(57787), KLC3(147700), PPP5C(5536), SNAP25(6616), GHRH(2691), SLC32A1(140679), STMN3(50861),                                                                                                                                                                                                                                                                                                                                                                                                                                                                                                                                                                                                                                                                                                                                                                                                                              |
| GO:0043025 (195 genes) ACSL4(2182), FRMD7(90167), BRS3(680), CNKSR2(22866), DLG3(1741), ATP7A(538), SHROOM2(357), SORT1(6272), KCND3(3752), DVL1(1855), ADORA1(134), CNTN2(6900), CAMK2N1(55450), TGF2(7042), PSEN2(5664), DLGAP3(58512), NCDN(23154), PPT1(5538), PTPRF(5792), PLK3(1263), NEGR1(257194), KLHL17(339451), ERMN(57471), DFNB59(494513), ALS2(57679), BMPR2(659), MAP2(4133), INHA(3623), SERPINE2(5270), DNER(92737), DPYSL5(56896), CAD(790), UCN(7349), STRN(6801), CRIPT(9419), RTN4(57142), ATP2B2(491), ALCAM(214), BOC(91653), SST(6750), CCR2(729230), GNAT1(2779), GRK4(2868), UCHL1(7345), EPHA5(2044), CPLX1(10815), ANXA3(306), BMPR1B(658), APC(324), SNCAIP(9627), PSD2(84249), PURA(5813), SLC6A3(6531), GRIA1(2890), CCNG1(900), MYO10(4651), KCNIP1(30820), DRD1(1812), CPLX2(10814), CANX(821), GNB2L1(10399), SLC1A3(6507), GHR(2690), SRD5A1(6715), PCSK1(5122), FABP7(2173), PTPRK(5796), ARG1(383), KATNA1(11104), NRSN1(140767), GABBR1(2550), AGER(177), ITPR3(3710), CPNE5(57699), EFHC1(114327), EPHA7(2045), VGF(7425), MET(4233), KCND2(3751), GRM8(2918), SMO(6608), EXOC4(60412), CALD1(800), CHRM2(1129), CNTNAP2(26047), CDK5(1020), DDC(1644), CALCR(799), TAC1(6863), SMURF1(57154), NOV(4856), DPYSL2(1808), FZD3(7976), RAB2A(5862), NCOA2(10499), KCNB2(9312), IMPA1(3612), CALB1(793), SDC2(6383), GRIN3A(116443), DFNB31(25861), DENND1A(57706), DBH(1621), CACNA1B(774), NTRK2(4915), CYP17A1(1586), VTI1A(143187), SLC18A2(6571), KNDC1(85442), NRP1(8829), CHAT(1103), BMPR1A(657), SNCG(6623), GRIA4(2893), DIXDC1(85458), HTR3B(9177), HSPA8(3312), CALCA(796), CHRM4(1132), P2RX3(5024), DRD4(1815), ILK(3611), SHANK2(22941), OMP(4975), DLG2(1740), ASCL1(429), PEBP1(5037), CABP1(9478), P2RX4(5025), LRP6(4040), ULK1(8408), PRPH(5630), ACVRL1(94), PDE1B(5153), LRP1(4035), LAMP1(3916), ANG(283), STRN3(29966), |

|                                                                                                                                                                                                                                                                                                                                                                                                                                                                                                                                                                                                                                                                                                                                                                                                                                                                                                                                             |
|---------------------------------------------------------------------------------------------------------------------------------------------------------------------------------------------------------------------------------------------------------------------------------------------------------------------------------------------------------------------------------------------------------------------------------------------------------------------------------------------------------------------------------------------------------------------------------------------------------------------------------------------------------------------------------------------------------------------------------------------------------------------------------------------------------------------------------------------------------------------------------------------------------------------------------------------|
| <p>AKAP5(9495), SLC8A3(6547), PSEN1(5663), TGFB3(7043), CHRNA7(1139), HDC(3067), CYP19A1(1588), GRINL1A(81488), LBXCOR1(390598), CHRNA5(1138), CHRNA3(1136), HOMER2(9455), TSC2(7249), AMFR(267), KATNB1(10300), CYBA(1535), PMM2(5373), SRR(63826), PAFAH1B1(5048), CDK5R1(8851), ACCN1(40), TRPV1(7442), PLXDC1(57125), RARA(5914), CRHR1(1394), TBX21(30009), GIP(2695), CYGB(114757), HRNBP3(146713), RAC3(5881), MYH10(4628), MYO5B(4645), MBP(4155), MAP1S(55201), TGFB1(7040), APOE(348), PPP5C(5536), SLC8A2(6543), HCN2(610), TUBB4(10382), SNAP25(6616), CST3(1471), VPS16(64601), NRSN2(80023), MYLK2(85366), ADA(100), ADNP(23394), CHRNA4(1137), EEF1A2(1917), GRIK1(2897), SOD1(6647), S100B(6285), P2RX6(9127), ADORA2A(135), KCNJ4(3761), PMM1(5372), ATXN10(25814),</p>                                                                                                                                                    |
| <p>GO:0043524 (70 genes) CITED1(4435), NGF(4803), AGT(183), TP73(7161), PPT1(5538), JUN(3725), GCLM(2730), NR4A2(4929), DLX1(1745), MSH2(4436), TGFA(7039), RHOA(387), C4orf31(79625), PPARGC1A(10891), WFS1(7466), SNCA(6622), SNCB(6620), GDNF(2668), ISL1(3670), F2R(2149), XRCC4(7518), RASA1(5921), MEF2C(4208), GRIK2(2898), SOD2(6648), GCLC(2729), HIPK2(28996), BRAF(673), XRCC2(7516), NRBP2(340371), UBE2V2(7336), NR4A3(8013), SET(6418), BARHL1(56751), GRIN1(2902), CNTFR(1271), PRDX3(10935), ADAM8(101), BDNF(627), HRAS(3265), CNTF(1270), VEGFB(7423), ILK(3611), CLCF1(23529), NTF3(4908), ERBB3(2065), LIG4(3981), POU4F1(5457), SIX1(6495), SIX4(51804), PSEN1(5663), TGFB3(7043), LGMN(5641), TYRO3(7301), FOXB1(27023), CLN3(1201), TOX3(27324), AARS(16), ROCK1(6093), BCL2(596), CACNA1A(773), CRLF1(9244), GPI(2821), AXL(558), BCL2L1(598), ADNP(23394), SOD1(6647), ITSN1(6453), ADORA2A(135), HMOX1(3162),</p> |
| <p>GO:0043525 (33 genes) RHOC(389), FASLG(356), NCF2(4688), TGFB2(7042), PTPRF(5792), PCSK9(255738), JUN(3725), AGRN(375790), BCL2L1(10018), CASP6(839), NR3C1(2908), ITGA1(3672), TNF(7124), EPHA7(2045), SRPK2(6733), CASP2(835), CDK5(1020), MUSK(4593), CASP7(840), ATM(472), IL18(3606), RAPSN(5913), MAP3K11(4296), ASCL1(429), HRK(8739), NQO1(1728), NF1(4763), CDK5R1(8851), TP53(7157), PMAIP1(5366), BAX(581), UBE2M(9040), MAP2K7(5609),</p>                                                                                                                                                                                                                                                                                                                                                                                                                                                                                    |
| <p>GO:0044306 (7 genes) DMD(1756), SYP(6855), TMEM57(55219), MME(4311), DLG4(1742), FSTL3(10272), SLC32A1(140679),</p>                                                                                                                                                                                                                                                                                                                                                                                                                                                                                                                                                                                                                                                                                                                                                                                                                      |
| <p>GO:0045664 (16 genes) NGF(4803), NLGN1(22871), C5orf13(9315), YWHAG(7532), DPYSL2(1808), CDK5RAP2(55755), CCND2(894), ATN1(1822), SIX1(6495), NUMB(8650), CDK5R1(8851), CDK5RAP3(80279), NOG(9241), TIMP2(7077), CDK5RAP1(51654), YWHAH(7533),</p>                                                                                                                                                                                                                                                                                                                                                                                                                                                                                                                                                                                                                                                                                       |
| <p>GO:0045665 (44 genes) SOX3(6658), RHOC(389), LMX1A(4009), ASPM(259266), CNTN2(6900), HES5(388585), TP73(7161), CTDSP1(58190), RTN4(57142), ID2(3398), SOX2(6657), CNTN4(152330), PHOX2B(8929), REST(5978), TLX3(30012), ISL1(3670), NR2E1(7101), ID4(3400), HOXA2(3199), GLI3(2737), ZHX2(22882), NBN(4683), LBX1(10660), ITGB1(3688), DIXDC1(85458), PAX6(5080), PRPF19(27339), ASCL1(429), DTX1(1840), GDF11(10220), SOX21(11166), FOXG1(2290), IRX3(79191), SLC6A4(6532), MIB1(57534), CALR(811), NOTCH3(4854), ZNF536(9745), NKX2-2(4821), FOXA2(3170), BMP7(655), APP(351), OLIG2(10215), TTC3(7267),</p>                                                                                                                                                                                                                                                                                                                           |
| <p>GO:0045666 (49 genes) HEYL(26508), ACTR3(10096), HOXD3(3232), NEUROD1(4760), GDF7(151449), SOX11(6664), ADRA2B(151), RHOA(387), NEUROG2(63973), ADRA2C(152), PHOX2B(8929), NKX6-1(4825), ATOH1(474), NEUROG1(4762), NKX2-5(1482), MAP1B(4131), MEF2C(4208), BMP6(654), EPO(2056), NRCAM(4897), FEZF1(389549), IL6(3569), VWC2(375567), GDF6(392255), TRIM32(22954), ZEB1(6935), ITGB1(3688), NEUROG3(50674), FEZ1(9638), CDON(50937), BDNF(627), ASCL1(429), IFNG(3458), FOXA1(3169), BMP4(652), RGS6(9628), SALL1(6299), IRX3(79191), CCL5(6352), NEUROD2(4761), SPAG9(9043), TGIF1(7050), TCF4(6925), TCF3(6929), NKX2-2(4821), FOXA2(3170), DNMT3B(1789), TGIF2(60436), BMP7(655),</p>                                                                                                                                                                                                                                                |
| <p>GO:0048168 (13 genes) BCAN(63827), CNTN2(6900), NCDN(23154), CAMK2A(815), DBN1(1627), VGF(7425), ARC(23237), EGR2(1959), PMCH(5367), RASGRF1(5923), APOE(348), MYLK2(85366), S100B(6285),</p>                                                                                                                                                                                                                                                                                                                                                                                                                                                                                                                                                                                                                                                                                                                                            |
| <p>GO:0048169 (22 genes) SYP(6855), NRAS(4893), KCNJ10(3766), AGT(183), SNCA(6622), DRD5(1816), EGR1(1958), DRD1(1812), GRIK2(2898), RIMS1(22999), CAMK2B(816), GRIN1(2902), DRD2(1813), HRAS(3265), GRIN2B(2904), KRAS(3845), RAB11A(8766), GRIN2A(2903), NF1(4763), DLG4(1742), NETO1(81832), SYNGR1(9145),</p>                                                                                                                                                                                                                                                                                                                                                                                                                                                                                                                                                                                                                           |
| <p>GO:0048172 (7 genes) SYP(6855), GRIK2(2898), UNC13B(10497), UNC13A(23025), PPFIA3(8541), GRIK1(2897), SYNGR1(9145),</p>                                                                                                                                                                                                                                                                                                                                                                                                                                                                                                                                                                                                                                                                                                                                                                                                                  |



|                                                                                                                                                                                                                                                                                                                                                          |
|----------------------------------------------------------------------------------------------------------------------------------------------------------------------------------------------------------------------------------------------------------------------------------------------------------------------------------------------------------|
| GO:0048663 (14 genes) PAX7(5081), ID2(3398), SMO(6608), SHH(6469), GLI3(2737), TGFBR1(7046), NOTCH1(4851), PTF1A(256297), PAX6(5080), GSX1(219409), BMP4(652), SMAD4(4089), NOTCH3(4854), OLIG2(10215),                                                                                                                                                  |
| GO:0048665 (10 genes) GSX2(170825), TLX3(30012), ISL1(3670), ASCL1(429), POU4F1(5457), FOXA1(3169), NTRK3(4916), FOXA3(3171), NKX2-2(4821), FOXA2(3170),                                                                                                                                                                                                 |
| GO:0048666 (26 genes) TGFB2(7042), TP73(7161), PPT1(5538), EN1(2019), GLI2(2736), IHH(3549), HTRA2(27429), DGKG(1608), EPHA5(2044), GFRA3(2676), MAP1B(4131), MEF2C(4208), FIG4(9896), SOD2(6648), SRF(6722), EN2(2020), PBX3(5090), PITX3(5309), NEUROD4(58158), NTF3(4908), WNK1(65125), PSEN1(5663), NDN(4692), NEUROD2(4761), RUNX1(861), LIF(3976), |
| GO:0048699 (13 genes) TGFB2(7042), TCF7L1(83439), LEF1(51176), TCF7(6932), DBN1(1627), FGFR1(2260), TCF7L2(6934), PTF1A(256297), CIT(11113), NTF3(4908), SIX1(6495), SIX4(51804), MAPT(4137),                                                                                                                                                            |
| GO:0048812 (24 genes) DMD(1756), ATP7A(538), RHOC(389), ALS2(57679), LIFR(3977), ITGA1(3672), THBS4(7060), GJA1(2697), DTNBP1(84062), DYNLT1(6993), PLXNA4(91584), MNX1(3110), CLU(1191), ILK(3611), PAK1(5058), WEE1(7465), DICER1(23405), MAP2K1(5604), CNTNAP1(8506), GAS7(8522), MAP1S(55201), KLK8(11202), BMP7(655), ADORA2A(135),                 |
| GO:0048935 (8 genes) RUNX3(864), HOXD10(3236), HOXD9(3235), ETV1(2115), POU4F1(5457), ISL2(64843), ONECUT2(9480), RUNX1(861),                                                                                                                                                                                                                            |
| GO:0051402 (16 genes) AIFM1(9131), POU4F3(5459), GRIK2(2898), TNFRSF21(27242), BNIP3(664), ERBB3(2065), GAPDH(2597), ATN1(1822), LIG4(3981), MAX(4149), SIAH1(6477), NLRP1(22861), BCL2(596), PIGT(51604), APP(351), BID(637),                                                                                                                           |
| GO:0070997 (5 genes) PPARGC1A(10891), PARK2(5071), ZNF746(155061), LRRK2(120892), BAG5(9529),                                                                                                                                                                                                                                                            |
| GO:0071542 (5 genes) NR4A2(4929), WNT5A(7474), FGF8(2253), PITX3(5309), LRP6(4040),                                                                                                                                                                                                                                                                      |
| <b>Keyword: GABA</b>                                                                                                                                                                                                                                                                                                                                     |
| GO:0004890 (18 genes) GABRE(2564), GABRA3(2556), GABRQ(55879), GABRD(2563), GABRR3(200959), GABRG1(2565), GABRA2(2555), GABRA4(2557), GABRB1(2560), GABRB2(2561), GABRA6(2559), GABRA1(2554), GABRG2(2566), GABRP(2568), GABRR1(2569), GABRR2(2570), GABRB3(2562), GABRG3(2567),                                                                         |
| GO:0021853 (5 genes) ARX(170302), CNTN2(6900), DRD1(1812), LHX6(26468), DRD2(1813),                                                                                                                                                                                                                                                                      |
| GO:0032228 (8 genes) NRAS(4893), NISCH(11188), USP46(64854), CNR1(1268), DRD2(1813), HRAS(3265), KRAS(3845), NF1(4763),                                                                                                                                                                                                                                  |
| GO:0032229 (8 genes) ADORA1(134), CNR2(1269), SLC6A1(6529), NPY5R(4889), HTR1B(3351), ADRA1A(148), STXBP1(6812), GRIK1(2897),                                                                                                                                                                                                                            |
| GO:0032230 (9 genes) ERBB4(2066), PRKCE(5581), TACR1(6869), OXTR(5021), TAC1(6863), CCKBR(887), NLGN2(57555), GRIK1(2897), ADORA2A(135),                                                                                                                                                                                                                 |
| GO:0050811 (8 genes) TRAK2(66008), TRAK1(22906), JAKMIP1(152789), GABARAPL1(23710), AKAP5(9495), GABARAPL2(11345), GABARAP(11337), ARFGEF2(10564),                                                                                                                                                                                                       |
| <b>Keyword: adrenergic</b>                                                                                                                                                                                                                                                                                                                               |
| GO:0004935 (7 genes) ADRA2B(151), ADRA2C(152), ADRB2(154), ADRA1B(147), ADRA1A(148), ADRA2A(150), ADRA1D(146),                                                                                                                                                                                                                                           |
| GO:0031694 (5 genes) ADRA2C(152), UCHL1(7345), ADRB1(153), ADRBK1(156), APLP1(333),                                                                                                                                                                                                                                                                      |
| <b>Keyword: agonist</b>                                                                                                                                                                                                                                                                                                                                  |
| GO:0048018 (5 genes) WNT3A(89780), WNT7A(7476), SFRP2(6423), CXCL13(10563), GAS6(2621),                                                                                                                                                                                                                                                                  |
| GO:0048019 (6 genes) AGTR2(186), ADH7(131), LRPAP1(4043), DKK1(22943), IL18BP(10068), ESR2(2100),                                                                                                                                                                                                                                                        |

|                                                                                                                                                                                                                                                                                                                                                                                                                                                                                                                                                                                                                                                                     |
|---------------------------------------------------------------------------------------------------------------------------------------------------------------------------------------------------------------------------------------------------------------------------------------------------------------------------------------------------------------------------------------------------------------------------------------------------------------------------------------------------------------------------------------------------------------------------------------------------------------------------------------------------------------------|
| <b>Keyword: cGMP</b>                                                                                                                                                                                                                                                                                                                                                                                                                                                                                                                                                                                                                                                |
| GO:0006182 (15 genes) GUCY2F(2986), HTR2C(3358), NPPA(4878), NPPB(4879), NPR1(4881), GUCA2B(2981), HTR2B(3357), NPPC(4880), GUCY1A3(2982), GUCY1B3(2983), AQP1(358), NPR2(4882), GUCY1A2(2977), GUCY2C(2984), GUCY2D(3000),                                                                                                                                                                                                                                                                                                                                                                                                                                         |
| GO:0007199 (8 genes) AGTR2(186), AGT(183), FZD7(8324), FZD1(8321), FZD6(8323), FZD3(7976), TBL3(10607), FZD2(2535),                                                                                                                                                                                                                                                                                                                                                                                                                                                                                                                                                 |
| GO:0030553 (12 genes) PDE11A(50940), CNGA3(1261), PDE5A(8654), CNGA1(1259), PRKG2(5593), PDE10A(10846), CNGB3(54714), PRKG1(5592), PDE6C(5146), PDE2A(5138), PDE6H(5149), PDE6G(5148),                                                                                                                                                                                                                                                                                                                                                                                                                                                                              |
| GO:0030828 (5 genes) NPR1(4881), NPPC(4880), GUCY1A3(2982), APOE(348), ADNP(23394),                                                                                                                                                                                                                                                                                                                                                                                                                                                                                                                                                                                 |
| <b>Keyword: phosphodiesterase</b>                                                                                                                                                                                                                                                                                                                                                                                                                                                                                                                                                                                                                                   |
| GO:0004114 (16 genes) PDE4B(5142), PDE11A(50940), PDE1A(5136), PDE6D(5147), PDE5A(8654), PDE6B(5158), PDE4D(5144), PDE8B(8622), PDE7B(27115), PDE10A(10846), PDE1C(5137), PDE3B(5140), PDE2A(5138), PDE8A(5151), PDE4C(5143), PDE9A(5152),                                                                                                                                                                                                                                                                                                                                                                                                                          |
| GO:0004115 (10 genes) PDE4B(5142), PDE4D(5144), PDE7B(27115), PDE7A(5150), PDE3B(5140), PDE3A(5139), PDE1B(5153), PDE8A(5151), PDE4A(5141), PDE4C(5143),                                                                                                                                                                                                                                                                                                                                                                                                                                                                                                            |
| GO:0004528 (5 genes) ENPP3(5169), ENPP1(5167), ENPP2(5168), APEX1(328), MTMR15(22909),                                                                                                                                                                                                                                                                                                                                                                                                                                                                                                                                                                              |
| GO:0004767 (7 genes) SMPDL3B(27293), SMPD4(55627), SMPD2(6610), SMPDL3A(10924), SMPD1(6609), SMPD3(55512), ENPP7(339221),                                                                                                                                                                                                                                                                                                                                                                                                                                                                                                                                           |
| GO:0008889 (7 genes) GDPD2(54857), ENPP6(133121), GDPD5(81544), GDPD4(220032), GDE1(51573), GDPD3(79153), GDPD1(284161),                                                                                                                                                                                                                                                                                                                                                                                                                                                                                                                                            |
| GO:0047555 (9 genes) PDE11A(50940), PDE5A(8654), PDE6B(5158), PDE6A(5145), PDE10A(10846), PDE6C(5146), PDE6H(5149), PDE6G(5148), PDE9A(5152),                                                                                                                                                                                                                                                                                                                                                                                                                                                                                                                       |
| <b>Keyword: synaptic</b>                                                                                                                                                                                                                                                                                                                                                                                                                                                                                                                                                                                                                                            |
| GO:0001963 (10 genes) DRD3(1814), SNCA(6622), DRD5(1816), DRD1(1812), CDK5(1020), DRD2(1813), TH(7054), DRD4(1815), ADORA2A(135), RASD2(23551),                                                                                                                                                                                                                                                                                                                                                                                                                                                                                                                     |
| GO:0007270 (5 genes) KIF1B(23095), VDAC1(7416), DLGAP2(9228), DRD2(1813), TMOD2(29767),                                                                                                                                                                                                                                                                                                                                                                                                                                                                                                                                                                             |
| GO:0007271 (14 genes) CHRNB2(1141), SLC5A7(60482), CHRNB3(1142), CHRNA10(57053), RAPSN(5913), RIC3(79608), CHRNA3(1136), CHRNB4(1143), NQO1(1728), CHRNE(1145), CHRNB1(1140), APOE(348), CHRNA4(1137), ADORA2A(135),                                                                                                                                                                                                                                                                                                                                                                                                                                                |
| GO:0007274 (12 genes) KIF1B(23095), SLC5A7(60482), CHRNA1(1134), EGR3(1960), CHAT(1103), P2RX3(5024), CHRM1(1128), NTF3(4908), CHRNB1(1140), DTNA(1837), CACNA1A(773), RAB3A(5864),                                                                                                                                                                                                                                                                                                                                                                                                                                                                                 |
| GO:0008021 (46 genes) SYTL4(94121), SYPL2(284612), SNAPIN(23557), TPRG1L(127262), PPT1(5538), RAB3B(5865), BIN1(274), SLC40A1(30061), SLC30A3(7781), SYN2(6854), RAB5A(5868), NPY1R(4886), RAB3C(115827), STXBP5(134957), GABBR1(2550), SNAP91(9892), SYPL1(6856), AMPH(273), PCLO(27445), KCNK9(51305), LGI3(203190), GRIN1(2902), APBA1(320), TRAPPC4(51399), TH(7054), SVOP(55530), PEBP1(5037), GRIN2B(2904), LRRK2(120892), SYT1(6857), TRIM9(114088), DMXL2(23312), SYT17(51760), SYNGR3(9143), CLN3(1201), SIAH1(6477), MT3(4504), ATP6V0D1(9114), HCRT(3060), SPHK1(8877), GIPC1(10755), RAB3A(5864), RABAC1(10567), MYLK2(85366), SEPT5(5413), SYN3(8224), |
| GO:0014069 (78 genes) GRIA3(2892), DNMT3(26052), ADORA1(134), CAMK2N1(55450), DLGAP3(58512), KLHL17(339451), TANC1(85461), ALS2(57679), ERBB4(2066), STRN(6801), SEMA4C(54910), NLGN1(22871), DLG1(1739), ITPR1(3708), GRID2(2895), PDLIM5(10611), PJA2(9867), SYNPO(11346), GRIA1(2890), MAP1B(4131), HOMER1(9456), GOPC(57120), IFNGR1(3459), GRM1(2911), DTNBP1(84062), SNAP91(9892), KCND2(3751), EXOC4(60412), CALD1(800), GRM3(2913), YWHAZ(7534), ARC(23237), DLGAP2(9228), PSD3(23362), LZTS1(11178),                                                                                                                                                       |

|                                                                                                                                                                                                                                                                                                                                                                                                                                                                                                                                                                                                                                                                                                                                                                                                                                                                                                                                                                                                                                                                                                                                                                                                                                                                                                                                                                                                                                                                                                                                                                                                                           |
|---------------------------------------------------------------------------------------------------------------------------------------------------------------------------------------------------------------------------------------------------------------------------------------------------------------------------------------------------------------------------------------------------------------------------------------------------------------------------------------------------------------------------------------------------------------------------------------------------------------------------------------------------------------------------------------------------------------------------------------------------------------------------------------------------------------------------------------------------------------------------------------------------------------------------------------------------------------------------------------------------------------------------------------------------------------------------------------------------------------------------------------------------------------------------------------------------------------------------------------------------------------------------------------------------------------------------------------------------------------------------------------------------------------------------------------------------------------------------------------------------------------------------------------------------------------------------------------------------------------------------|
| PTK2B(2185), GRIN3A(116443), MPDZ(8777), GRIN1(2902), ITGA8(8516), GRIA4(2893), LIN7C(55327), CHRM4(1132), CHRM1(1128), SHANK2(22941), DLG2(1740), CABP1(9478), P2RX4(5025), GRIN2B(2904), EPS8(2059), CACNA1C(775), LIN7A(8825), ANKS1B(56899), AKAP5(9495), SIPA1L1(26037), ADAM10(102), CHRNA3(1136), CPEB1(64506), HOMER2(9455), AXIN1(8312), GRIN2A(2903), AXIN2(8313), DLG4(1742), GRIN2C(2905), DLGAP1(9229), NETO1(81832), DNM2(1785), LPHN1(22859), HOMER3(9454), LRFN1(57622), LIN7B(64130), SHANK1(50944), MYLK2(85366), ProSAPIP(9762), P2RX6(9127), ADORA2A(135), PICK1(9463), SHANK3(85358),                                                                                                                                                                                                                                                                                                                                                                                                                                                                                                                                                                                                                                                                                                                                                                                                                                                                                                                                                                                                                |
| GO:0016079 (7 genes) RIMS1(22999), PCLO(27445), SPTBN2(6712), P2RX7(5027), CPLX3(594855), DOC2A(8448), RAB3A(5864),                                                                                                                                                                                                                                                                                                                                                                                                                                                                                                                                                                                                                                                                                                                                                                                                                                                                                                                                                                                                                                                                                                                                                                                                                                                                                                                                                                                                                                                                                                       |
| GO:0016081 (5 genes) STX1A(6804), PLDN(26258), STX4(6810), SNAP25(6616), SNPH(9751),                                                                                                                                                                                                                                                                                                                                                                                                                                                                                                                                                                                                                                                                                                                                                                                                                                                                                                                                                                                                                                                                                                                                                                                                                                                                                                                                                                                                                                                                                                                                      |
| GO:0016188 (5 genes) SYP(6855), ZDHHC15(158866), STXBP1(6812), UNC13A(23025), RAB3A(5864),                                                                                                                                                                                                                                                                                                                                                                                                                                                                                                                                                                                                                                                                                                                                                                                                                                                                                                                                                                                                                                                                                                                                                                                                                                                                                                                                                                                                                                                                                                                                |
| GO:0030672 (41 genes) SYN1(6853), SYT6(148281), SV2A(9900), SNAPIN(23557), SYT11(23208), BCAN(63827), SYT2(127833), OTOF(9381), SLC30A3(7781), SEMA4C(54910), SYNPR(132204), SV2C(22987), DTNBP1(84062), AMPH(273), STX1A(6804), ICA1(3382), GAD2(2572), SLC17A6(57084), SYT7(9066), SYT12(91683), SYT9(143425), SVOP(55530), RPH3A(22895), SYT10(341359), VAMP1(6843), SYT1(6857), SLC17A8(246213), DMXL2(23312), SCAMP5(192683), SV2B(9899), DOC2A(8448), C16orf70(80262), ZNRF1(84937), VAMP2(6844), SYT4(6860), SLC17A7(57030), SYT3(84258), SYT5(6861), SLC32A1(140679), SYN3(8224), SYNGR1(9145),                                                                                                                                                                                                                                                                                                                                                                                                                                                                                                                                                                                                                                                                                                                                                                                                                                                                                                                                                                                                                   |
| GO:0032228 (8 genes) NRAS(4893), NISCH(11188), USP46(64854), CNR1(1268), DRD2(1813), HRAS(3265), KRAS(3845), NF1(4763),                                                                                                                                                                                                                                                                                                                                                                                                                                                                                                                                                                                                                                                                                                                                                                                                                                                                                                                                                                                                                                                                                                                                                                                                                                                                                                                                                                                                                                                                                                   |
| GO:0032229 (8 genes) ADORA1(134), CNR2(1269), SLC6A1(6529), NPY5R(4889), HTR1B(3351), ADRA1A(148), STXBP1(6812), GRIK1(2897),                                                                                                                                                                                                                                                                                                                                                                                                                                                                                                                                                                                                                                                                                                                                                                                                                                                                                                                                                                                                                                                                                                                                                                                                                                                                                                                                                                                                                                                                                             |
| GO:0032230 (9 genes) ERBB4(2066), PRKCE(5581), TACR1(6869), OXTR(5021), TAC1(6863), CCKBR(887), NLGN2(57555), GRIK1(2897), ADORA2A(135),                                                                                                                                                                                                                                                                                                                                                                                                                                                                                                                                                                                                                                                                                                                                                                                                                                                                                                                                                                                                                                                                                                                                                                                                                                                                                                                                                                                                                                                                                  |
| GO:0035249 (16 genes) SLC1A4(6509), GRID2(2895), ADRB2(154), PARK2(5071), GRM8(2918), CDK5(1020), PLAT(5327), GRIN1(2902), UNC13B(10497), SHC3(53358), CNIH2(254263), P2RX1(5023), CACNA1A(773), UNC13A(23025), GRIN2D(2906), NAPB(63908),                                                                                                                                                                                                                                                                                                                                                                                                                                                                                                                                                                                                                                                                                                                                                                                                                                                                                                                                                                                                                                                                                                                                                                                                                                                                                                                                                                                |
| GO:0042734 (39 genes) L1CAM(3897), SYP(6855), ADORA1(134), FBXO45(200933), GRM2(2912), ERC2(26059), KCTD8(386617), SNCAIP(9627), KCTD16(57528), CAMK2A(815), GABRA6(2559), GRIK2(2898), GRM1(2911), RIMS1(22999), SNAP91(9892), CADPS2(93664), GRM8(2918), ZNRF2(223082), GRM3(2913), RIMS2(9699), SCRIB(23513), DENND1A(57706), GAD2(2572), GRIK4(2900), SLC1A2(6506), FOSL1(8061), PICALM(8301), GRIN2B(2904), SYT1(6857), ERC1(23085), KCTD12(115207), UNC13C(440279), NPTN(27020), GRIN2A(2903), UNC13A(23025), LRFN3(79414), LRRC4B(94030), ADORA2A(135), PICK1(9463),                                                                                                                                                                                                                                                                                                                                                                                                                                                                                                                                                                                                                                                                                                                                                                                                                                                                                                                                                                                                                                               |
| GO:0045211 (151 genes) GLRA4(441509), GRIA3(2892), GLRA2(2742), GABRE(2564), GABRA3(2556), GABRQ(55879), MAGEE1(57692), CHRN2(1141), GABRD(2563), ADORA1(134), CAMK2N1(55450), CHRM3(1131), OPRD1(4985), DLGAP3(58512), GRIK3(2899), KLHL17(339451), CLSTN1(22883), TANC1(85461), CHRNA1(1134), CHRND(1144), CHRNG(1146), STRN(6801), CRIPT(9419), SEMA4F(10505), SEMA4C(54910), CLSTN2(64084), NLGN1(22871), HTR3C(170572), HTR3E(285242), FBXO45(200933), DLG1(1739), GRM7(2917), GABRR3(200959), GLRB(2743), GRIA2(2891), GLRA3(8001), CHRNA9(55584), KCTD8(386617), GABRG1(2565), GABRA2(2555), GABRA4(2557), GABRB1(2560), GRID2(2895), PDLIM5(10611), PJA2(9867), KCTD16(57528), SYNPO(11346), GLRA1(2741), GRIA1(2890), GABRB2(2561), GABRA6(2559), GABRA1(2554), GABRG2(2566), GABRP(2568), PRR7(80758), F2R(2149), HOMER1(9456), GRIK2(2898), GOPC(57120), UTRN(7402), SYNE1(23345), DTNBP1(84062), GABBR1(2550), LRFN2(57497), SNAP91(9892), GABRR1(2569), GABRR2(2570), EPHA7(2045), CADPS2(93664), LRRC4(64101), CHRM2(1129), GRM3(2913), ARC(23237), DLGAP2(9228), SCRIB(23513), PSD3(23362), LZTS1(11178), CHRNA2(1135), CHRN3(1142), CHRNA6(8973), GABBR2(9568), GRIN3A(116443), MPDZ(8777), GRIN1(2902), KCNMA1(3778), GRID1(2894), GRIA4(2893), HTR3B(9177), HTR3A(3359), GRIK4(2900), LIN7C(55327), CHRNA10(57053), CHRM4(1132), RAPSN(5913), CHRM1(1128), SHANK2(22941), DLG2(1740), PICALM(8301), CABP1(9478), GRIN2B(2904), SSPN(8082), FAIM2(23017), GRASP(160622), ERBB3(2065), GRIP1(23426), CLSTN3(9746), LIN7A(8825), ANKS1B(56899), KCTD12(115207), GPHN(10243), SIPA1L1(26037), GABRB3(2562), |

|                                                                                                                                                                                                                                                                                                                                                                                                                                                                                                                                                                |
|----------------------------------------------------------------------------------------------------------------------------------------------------------------------------------------------------------------------------------------------------------------------------------------------------------------------------------------------------------------------------------------------------------------------------------------------------------------------------------------------------------------------------------------------------------------|
| GABRA5(2558), GABRG3(2567), CHRFB7A(89832), CHRNA7(1139), CHRM5(1133), SHC4(399694), CHRNA5(1138), CHRNA3(1136), CHRN4(1143), CPEB1(64506), HOMER2(9455), GRIN2A(2903), ERBB2(2064), P2RX1(5023), CHRNE(1145), AKAP1(8165), DLG4(1742), GRIN2C(2905), ZACN(353174), NLGN2(57555), CHRN1(1140), DLGAP1(9229), NETO1(81832), DNMT2(1785), HOMER3(9454), LRFN3(79414), LRFN1(57622), GRIK5(2901), GRIN2D(2906), LIN7B(64130), SHANK1(50944), GRIN3B(116444), ProSAPIP1(9762), SNTA1(6640), DLGAP4(22839), CHRNA4(1137), GRIK1(2897), ADORA2A(135), SHANK3(85358), |
| GO:0048167 (18 genes) ADORA1(134), PSEN2(5664), CNTN4(152330), HTT(3064), CTNND2(1501), MYO6(4646), YWHAG(7532), LZTS1(11178), PLAT(5327), CALB1(793), BDNF(627), P2RX3(5024), GRIN2B(2904), PSEN1(5663), GRIN2A(2903), GIPC1(10755), ADORA2A(135), YWHAH(7533),                                                                                                                                                                                                                                                                                               |
| GO:0048168 (13 genes) BCAN(63827), CNTN2(6900), NCDN(23154), CAMK2A(815), DBN1(1627), VGF(7425), ARC(23237), EGR2(1959), PMCH(5367), RASGRF1(5923), APOE(348), MYLK2(85366), S100B(6285),                                                                                                                                                                                                                                                                                                                                                                      |
| GO:0048169 (22 genes) SYP(6855), NRAS(4893), KCNJ10(3766), AGT(183), SNCA(6622), DRD5(1816), EGR1(1958), DRD1(1812), GRIK2(2898), RIMS1(22999), CAMK2B(816), GRIN1(2902), DRD2(1813), HRAS(3265), GRIN2B(2904), KRAS(3845), RAB11A(8766), GRIN2A(2903), NF1(4763), DLG4(1742), NETO1(81832), SYNGR1(9145),                                                                                                                                                                                                                                                     |
| GO:0048172 (7 genes) SYP(6855), GRIK2(2898), UNC13B(10497), UNC13A(23025), PPFIA3(8541), GRIK1(2897), SYNGR1(9145),                                                                                                                                                                                                                                                                                                                                                                                                                                            |
| GO:0048488 (7 genes) BIN1(274), SNCA(6622), CDK5(1020), AMPH(273), DENND1A(57706), SYNJ1(8867), ITSN1(6453),                                                                                                                                                                                                                                                                                                                                                                                                                                                   |
| GO:0048489 (6 genes) CTNNA1(1499), DPYSL2(1808), SH3GL2(6456), LIN7A(8825), DNMT2(1785), MYLK2(85366),                                                                                                                                                                                                                                                                                                                                                                                                                                                         |
| GO:0048786 (6 genes) SYN1(6853), ADORA1(134), BSN(8927), GRM7(2917), NUFIP1(26747), ADORA2A(135),                                                                                                                                                                                                                                                                                                                                                                                                                                                              |
| GO:0050804 (9 genes) NLGN3(54413), NLGN1(22871), CSPG5(10675), PDK1(54899), PPP3CA(5530), GRIK2(2898), GRM3(2913), GRIA4(2893), NTF3(4908),                                                                                                                                                                                                                                                                                                                                                                                                                    |
| GO:0050805 (6 genes) GNAI3(2773), RAPGEF4(11069), BCHE(590), GNAI2(2771), GABBR1(2550), ADNP(23394),                                                                                                                                                                                                                                                                                                                                                                                                                                                           |
| GO:0050806 (9 genes) PRKCZ(5590), NMU(10874), SLC1A3(6507), GRIK2(2898), TNF(7124), LGI1(9211), CCL2(6347), KISS1R(84634), OXT(5020),                                                                                                                                                                                                                                                                                                                                                                                                                          |
| GO:0051966 (9 genes) OPHN1(4983), SERPINE2(5270), UCN(7349), GRM1(2911), CNR1(1268), PSEN1(5663), PRKACA(5566), GRIK1(2897), MAPK8IP2(23542),                                                                                                                                                                                                                                                                                                                                                                                                                  |
| GO:0051967 (7 genes) ADORA1(134), GRIK3(2899), GRIK2(2898), HTR1B(3351), DRD2(1813), HTR2A(3356), GRIK1(2897),                                                                                                                                                                                                                                                                                                                                                                                                                                                 |
| GO:0051968 (12 genes) TNFR(7143), PTGS2(5743), NRXN1(9378), NLGN1(22871), OXTR(5021), DRD1(1812), NTRK2(4915), GRIA4(2893), CCKBR(887), NLGN2(57555), ADORA2A(135), SHANK3(85358),                                                                                                                                                                                                                                                                                                                                                                             |
| GO:0060079 (17 genes) ADORA1(134), GHRL(51738), PPP3CA(5530), SNCA(6622), GRID2(2895), GRIK2(2898), OPRM1(4988), ATXN1(6310), CDK5(1020), GRIN1(2902), P2RX4(5025), GRIN2B(2904), CHRNA3(1136), GRIN2A(2903), HCRT(3060), GRIN2C(2905), ADORA2A(135),                                                                                                                                                                                                                                                                                                          |
| GO:0060080 (6 genes) NLGN3(54413), GLRA1(2741), GRIK2(2898), DRD4(1815), CHRNA4(1137), ADORA2A(135),                                                                                                                                                                                                                                                                                                                                                                                                                                                           |
| GO:0060291 (5 genes) SNCA(6622), DRD1(1812), SLC2A2(25769), NPTN(27020), GIP(2695),                                                                                                                                                                                                                                                                                                                                                                                                                                                                            |

#### S4. Interval-based gene set enrichment tests

To quantify the statistical significance of aggregated MDD association signals for candidate gene sets, we used a GWAS-specific set-based association analysis tool, INRICH<sup>(12)</sup>. INRICH is a GWAS-specific multi-locus association analysis method that provides conservative type I error rates, while adjusting for multiple genomic confounding factors, such as different gene sizes, SNP numbers, and linkage disequilibrium (LD). The INRICH analysis procedure comprises three major steps: i) linkage disequilibrium (LD)-based interval data generation to identify unique regions of association; ii) empirical enrichment calculation using an interval-based permutation strategy; and iii) second-step permutation for multiple testing correction at the gene set level. For this analysis, a list of 1,477 genomic regions with independent association signals was generated from the meta analysis results of three GWAS datasets using PLINK LD-based clumping (*clump-p1*=0.005; *clump-p2*=0.05; *clump-r2*=0.5; *clump-kb*=250). Recent eQTL studies have shown that 95% of common genetic variation affecting transcript expression resides within 20kb of the transcription start and end sites of genes<sup>(13)</sup>. To capture such cis-regulatory variants, we defined gene regions as 20kb up/downstream of the RefSeq transcription starting/ending sites for 17,529 genes on autosomal chromosomes based on the Human Genome Browser<sup>(14)</sup> build hg18. Among 1,477 associated intervals, 539 LD-independent non-overlapping genomic regions overlie genic regions. Next, the enrichment statistics of each target gene set was calculated as a *p*-value that indicates the probability of observing a given number of overlaps between the 539 MDD-associated genomic intervals and the genes mapped to the examined gene set under the null hypothesis of no disease association. An interval-based randomization strategy was used to generate the distribution of the enrichment test statistics under the null hypothesis. Finally, resampling-based second-step permutation was conducted to adjust the pathway-level empirical *p*-values for testing candidate gene sets. The numbers of the first and the second-step permutation processes were 1,00,000 and 10,000, respectively. From this analysis, we identified a list of gene sets with the enrichment *p*-value < 0.05 after correcting for testing of multiple gene sets.

**Table S4.1** Gene-set enrichment analysis results of top 30 target gene sets

| Gene Set   |                                                             | Gene Number |     | Enrichment P-value | Annotated Genes                                                                                                                                                                                                                                                                              |
|------------|-------------------------------------------------------------|-------------|-----|--------------------|----------------------------------------------------------------------------------------------------------------------------------------------------------------------------------------------------------------------------------------------------------------------------------------------|
| GO Term    | Name                                                        | All         | Sig |                    |                                                                                                                                                                                                                                                                                              |
| GO:0035249 | Synaptic transmission, glutamatergic                        | 16          | 6   | 0.00069            | ADRB2, CACNA1A, CDK5, CNIH2, GRID2, GRIN1, GRIN2D, GRM8, NAPB, P2RX1, PARK2, PLAT, SHC3, SLC1A4, UNC13A, UNC13B                                                                                                                                                                              |
| GO:0021953 | Central nervous system neuron differentiation               | 7           | 2   | 0.03656            | BCL11B, LMX1A, MET, MNX1, NR4A2, SMO, TULP3                                                                                                                                                                                                                                                  |
| GO:0021522 | Spinal cord motor neuron differentiation                    | 6           | 2   | 0.057699           | ABT1, CACNA1A, GIGYF2, MDGA2, NKX2-2, SOX4                                                                                                                                                                                                                                                   |
| GO:0004115 | 3',5'-cyclic-AMP phosphodiesterase activity                 | 10          | 3   | 0.076999           | PDE1B, PDE3A, PDE3B, PDE4A, PDE4B, PDE4C, PDE4D, PDE7A, PDE7B, PDE8A                                                                                                                                                                                                                         |
| GO:0035254 | Glutamate receptor binding                                  | 5           | 2   | 0.115559           | ATP2B2, C16orf70, CAMK2A, GRIN2A, RASGRF1                                                                                                                                                                                                                                                    |
| GO:0051968 | Positive regulation of synaptic transmission, glutamatergic | 12          | 3   | 0.300927           | ADORA2A, CCKBR, DRD1, GRIA4, NLGN1, NLGN2, NRXN1, NTRK2, OXTR, PTGS2, SHANK3, TNFR                                                                                                                                                                                                           |
| GO:0005234 | Extracellular-glutamate-gated ion channel activity          | 18          | 4   | 0.325667           | GRIA1, GRIA2, GRIA3, GRIA4, GRID1, GRID2, GRIK1, GRIK2, GRIK3, GRIK4, GRIK5, GRIN1, GRIN2A, GRIN2B, GRIN2C, GRIN2D, GRIN3A, STX1B                                                                                                                                                            |
| GO:0043525 | Positive regulation of neuron apoptosis                     | 33          | 2   | 0.326557           | AGRN, ASCL1, ATM, BAX, BCL2L11, CASP2, CASP6, CASP7, CDK5, CDK5R1, EPHA7, FASLG, HRK, IL18, ITGA1, JUN, MAP2K7, MAP3K11, MUSK, NCF2, NF1, NQO1, NR3C1, PCSK9, PMAIP1, PTPRF, RAPSN, RHOC, SRPK2, TGFB2, TNF, TP53, UBE2M                                                                     |
| GO:0030672 | Synaptic vesicle membrane                                   | 41          | 4   | 0.347357           | AMPH, BCAN, C16orf70, DMXL2, DOC2A, DTNBP1, GAD2, ICA1, OTOF, RPH3A, SCAMP5, SEMA4C, SLC17A6, SLC17A7, SLC17A8, SLC30A3, SLC32A1, SNAPIN, STX1A, SV2A, SV2B, SV2C, SVOP, SYN1, SYN3, SYNGR1, SYNPR, SYT1, SYT10, SYT11, SYT12, SYT2, SYT3, SYT4, SYT5, SYT6, SYT7, SYT9, VAMP1, VAMP2, ZNRF1 |
| GO:0004972 | N-methyl-D-aspartate selective glutamate receptor activity  | 6           | 2   | 0.380836           | GRIN1, GRIN2A, GRIN2B, GRIN2C, GRIN2D, GRIN3A                                                                                                                                                                                                                                                |
| GO:0017146 | N-methyl-D-aspartate selective glutamate receptor complex   | 7           | 2   | 0.385116           | EPS8, GRIN1, GRIN2A, GRIN2B, GRIN2C, GRIN2D, GRIN3A                                                                                                                                                                                                                                          |

|            |                                   |     |    |          |                                                                                                                                                                                                                                                                                                                                                                                                                                                                                                                                                                                                                                                                                                                                                                                                                                                                                                                                                                                                                                                                                                                                                                                                                                                                                                                                                                                                                                                                                                                                                                                                                                                                                                                                                                                                                                                                                                                                                             |
|------------|-----------------------------------|-----|----|----------|-------------------------------------------------------------------------------------------------------------------------------------------------------------------------------------------------------------------------------------------------------------------------------------------------------------------------------------------------------------------------------------------------------------------------------------------------------------------------------------------------------------------------------------------------------------------------------------------------------------------------------------------------------------------------------------------------------------------------------------------------------------------------------------------------------------------------------------------------------------------------------------------------------------------------------------------------------------------------------------------------------------------------------------------------------------------------------------------------------------------------------------------------------------------------------------------------------------------------------------------------------------------------------------------------------------------------------------------------------------------------------------------------------------------------------------------------------------------------------------------------------------------------------------------------------------------------------------------------------------------------------------------------------------------------------------------------------------------------------------------------------------------------------------------------------------------------------------------------------------------------------------------------------------------------------------------------------------|
| GO:0048167 | Regulation of synaptic plasticity | 18  | 3  | 0.385366 | ADORA1, ADORA2A, BDNF, CALB1, CNTN4, CTNND2, GIPC1, GRIN2A, GRIN2B, HTT, LZTS1, MYO6, P2RX3, PLAT, PSEN1, PSEN2, YWHAG, YWHAH                                                                                                                                                                                                                                                                                                                                                                                                                                                                                                                                                                                                                                                                                                                                                                                                                                                                                                                                                                                                                                                                                                                                                                                                                                                                                                                                                                                                                                                                                                                                                                                                                                                                                                                                                                                                                               |
| GO:0007268 | Synaptic transmission             | 266 | 20 | 0.439076 | ABAT, ACCN1, ACHE, ACTN2, ADCY1, ADCY3, ADCY8, AKAP5, AKAP9, ALDH2, ALDH5A1, AMPH, AP2A1, AP2A2, AP2B1, AP2M1, AP2S1, APBA1, APBA2, APBA3, ATXN3, BSN, CACNA1A, CACNA1B, CACNA1E, CACNB2, CACNB3, CACNB4, CACNG2, CACNG3, CACNG4, CACNG8, CALM3, CAMK2A, CAMK2B, CAMK2D, CAMK2G, CAMK4, CAMKK1, CARTPT, CAV2, CBLN1, CHAT, CHRNA1, CHRNA2, CHRNA3, CHRNA4, CHRNA5, CHRNA6, CHRNA7, CHRNA9, CHRNB2, CHRNB3, CHRNB4, CHRND, CHRNE, CHRNG, CNP, COMT, CORT, CPLX1, CPNE6, CREB1, CRH, CTNNB1, DBH, DDC, DFN31, DLG1, DLG3, DLG4, DLGAP1, DNAJC5, DOC2A, DRD5, DTNA, EPB41L1, EXOC4, FGF2, GABARAP, GABBR2, GABRA3, GABRA5, GABRB2, GABRD, GABRG1, GABRG3, GABRR1, GABRR2, GABRR3, GAD1, GAD2, GALR2, GALR3, GIPC1, GJA10, GJC1, GJD2, GLRA1, GLRA3, GLRB, GLS, GLS2, GLUL, GNB1, GNG2, GPR176, GRIA1, GRIA2, GRIA3, GRIA4, GRIK1, GRIK2, GRIK3, GRIK4, GRIK5, GRIN1, GRIN2A, GRIN2B, GRIN2C, GRIN2D, GRIP1, GRIP2, GRM1, GRM2, GRM3, GRM4, GRM5, GRM7, GRM8, HAP1, HCRT, HCRTR1, HCRTR2, HOMER1, HRAS, HRH1, HSPA8, HTR1B, HTR1D, HTR1E, HTR1F, HTR2A, HTR2C, HTR3A, HTR3B, HTR6, HTR7, KCNA1, KCNC4, KCND2, KCNIP1, KCNIP2, KCNK3, KCNMA1, KCNMB1, KCNMB4, KCNN1, KCNQ2, KCNQ3, KCNQ5, KIF5A, LPAR3, MAOA, MAPK1, MBP, MDM2, MPZ, MTNR1B, MYCBPAP, MYO6, NCALD, NEFL, NOVA1, NPBWR1, NPFF, NPTX1, NPTX2, NPY, NPY5R, NRXN2, NRXN3, NSF, NTSR1, OMP, OPRK1, PAFAH1B1, PANX1, PANX2, PCDHB10, PCDHB11, PCDHB13, PCDHB14, PCDHB16, PCDHB2, PCDHB3, PCDHB4, PCDHB5, PCDHB6, PCDHB9, PDE7B, PDPK1, PDYN, PI4KA, PICK1, PLCB1, PLCB2, PLCB3, PLP1, PMCH, PMP22, PNOC, PRKACB, PRKCA, PRKCG, RAB3A, RAF1, RAPSN, RASGRF1, RASGRF2, RIMS1, RIT2, RPS6KA1, RPS6KA2, RPS6KA3, RPS6KA6, SCN1B, SCN2B, SDCBP, SLC12A5, SLC17A7, SLC18A2, SLC18A3, SLC1A1, SLC1A2, SLC1A3, SLC1A6, SLC22A2, SLC32A1, SLC38A1, SLC38A2, SLC5A7, SLC6A1, SLC6A11, SLC6A12, SLC6A13, SLC6A2, SLC6A3, SLC6A5, SNAP25, SNAP91, SST, STX1A, STX1B, STXBP1, SYN1, SYN2, SYPL1, SYT1, SYT5, TAAR5, |

|            |                                               |    |   |          |                                                                                                                                                                                                                                                                                                                                                                                                                                                                                                                                            |
|------------|-----------------------------------------------|----|---|----------|--------------------------------------------------------------------------------------------------------------------------------------------------------------------------------------------------------------------------------------------------------------------------------------------------------------------------------------------------------------------------------------------------------------------------------------------------------------------------------------------------------------------------------------------|
|            |                                               |    |   |          | TAC1, TH, UNC119, UNC13C, UTS2, VAMP2, VIPR1                                                                                                                                                                                                                                                                                                                                                                                                                                                                                               |
| GO:0043524 | Negative regulation of neuron apoptosis       | 70 | 3 | 0.449426 | AARS, ADAM8, ADNP, ADORA2A, AGT, AXL, BARHL1, BCL2, BCL2L1, BDNF, BRAF, C4orf31, CACNA1A, CITED1, CLCF1, CLN3, CNTF, CNTFR, CRLF1, DLX1, ERBB3, F2R, FOXB1, GCLC, GCLM, GDNF, GPI, GRIK2, GRIN1, HIPK2, HMOX1, HRAS, ILK, ISL1, ITSN1, JUN, LGMN, LIG4, MEF2C, MSH2, NGF, NR4A2, NR4A3, NRBP2, NTF3, POU4F1, PPARGC1A, PPT1, PRDX3, PSEN1, RASA1, RHOA, ROCK1, SET, SIX1, SIX4, SNCA, SNCB, SOD1, SOD2, TGFA, TGFB3, TOX3, TP73, TYRO3, UBE2V2, VEGFB, WFS1, XRCC2, XRCC4                                                                  |
| GO:0042734 | Presynaptic membrane                          | 39 | 6 | 0.456305 | ADORA1, ADORA2A, CADPS2, CAMK2A, DENND1A, ERC1, ERC2, FBXO45, FOSL1, GABRA6, GAD2, GRIK2, GRIK4, GRIN2A, GRIN2B, GRM1, GRM2, GRM3, GRM8, KCTD12, KCTD16, KCTD8, L1CAM, LRFN3, LRRC4B, NPTN, PICALM, PICK1, RIMS1, RIMS2, SCRIB, SLC1A2, SNAP91, SNCAIP, SYP, SYT1, UNC13A, UNC13C, ZNRF2                                                                                                                                                                                                                                                   |
| GO:0045666 | Positive regulation of neuron differentiation | 49 | 3 | 0.542915 | ACTR3, ADRA2B, ADRA2C, ASCL1, ATOH1, BDNF, BMP4, BMP6, BMP7, CCL5, CDON, DNMT3B, EPO, FEZ1, FEZF1, FOXA1, FOXA2, GDF6, GDF7, HEYL, HOXD3, IFNG, IL6, IRX3, ITGB1, MAP1B, MEF2C, NEUROD1, NEUROD2, NEUROG1, NEUROG2, NEUROG3, NKX2-2, NKX2-5, NKX6-1, NRCAM, PHOX2B, RGS6, RHOA, SALL1, SOX11, SPAG9, TCF3, TCF4, TGIF1, TGIF2, TRIM32, VWC2, ZEB1                                                                                                                                                                                          |
| GO:0016595 | Glutamate binding                             | 9  | 2 | 0.551674 | CPS1, GCLC, GRIK1, GRIN1, GRIN2A, GRIN2D, GRM7, SLC1A1, SLC1A3                                                                                                                                                                                                                                                                                                                                                                                                                                                                             |
| GO:0043005 | Neuron projection                             | 75 | 8 | 0.559274 | ACCN1, ACOT7, ADCYAP1R1, ANKS1A, ARG1, ATP1A2, ATP7A, AVIL, BDKRB1, BRS3, CACYBP, CAMK1G, CASP8, CDH13, CLN3, CNKSR2, CPNE5, CTNNB1, CTSL2, CX3CR1, CYGB, DAXX, DCX, DOCK7, DTNBP1, EPHA8, ESR1, FADD, FRMD7, GABBR2, GHRH, GHSR, GRIN2A, GRIN2B, GRIN3A, GRM8, HSPA8, IGF1R, ITGA1, KCND3, KCNQ4, KIF5B, KIF5C, KLC2, KLC3, LIMK1, MARK4, MYO10, MYO5A, NRCAM, NRSN1, PARK2, PPM1A, PPP1CA, PPP5C, PTGS2, PTPN13, RAC3, RTN4, S100A4, SLC18A2, SLC1A3, SLC32A1, SNAP25, STMN3, STX1A, STX3, SYT1, SYT4, TH, TPH1, TPH2, TSGA10, ULK1, VGF |
| GO:0007158 | Neuron cell-cell adhesion                     | 11 | 3 | 0.568804 | ASTN1, CDK5R1, CNTN4, CTNND2, NCAM2, NINJ2, NLGN1, NLGN2, NLGN3, NRXN1, TNFR                                                                                                                                                                                                                                                                                                                                                                                                                                                               |
| GO:0042417 | Dopamine metabolic process                    | 10 | 2 | 0.584154 | ATP7A, DRD1, DRD2, DRD3, DRD4, GRIN2A, NPR1, PARK2, SNCAIP, SNCB                                                                                                                                                                                                                                                                                                                                                                                                                                                                           |
| GO:0035235 | Ionotropic glutamate receptor signaling       | 9  | 2 | 0.591624 | APP, ATP1A3, CDK5R1, CLN3, GRIK1, GRIN1, GRIN2A, GRIN2B, GRIN3A                                                                                                                                                                                                                                                                                                                                                                                                                                                                            |





|            |                             |     |    |          |                                                                                                                                                                                                                                                                                                                                                                                                                                                                                                                                                                                                                                                                                                                                                                                                                                                                                                                                                                                                                                                                                                                                                                                                                                                                                                                                                                                               |
|------------|-----------------------------|-----|----|----------|-----------------------------------------------------------------------------------------------------------------------------------------------------------------------------------------------------------------------------------------------------------------------------------------------------------------------------------------------------------------------------------------------------------------------------------------------------------------------------------------------------------------------------------------------------------------------------------------------------------------------------------------------------------------------------------------------------------------------------------------------------------------------------------------------------------------------------------------------------------------------------------------------------------------------------------------------------------------------------------------------------------------------------------------------------------------------------------------------------------------------------------------------------------------------------------------------------------------------------------------------------------------------------------------------------------------------------------------------------------------------------------------------|
| GO:0030182 | Neuron differentiation      | 81  | 2  | 0.686523 | ADNP2, ALDH1A2, ATP2B2, BARHL2, BRSK1, BRSK2, BTG2, BTG4, CDK5, CDK5R1, CEBPB, CHAT, CHRDL1, DAPK3, DPYSL5, DRGX, EDN3, EFNA1, EMX1, EPHA2, FZD1, FZD10, FZD2, FZD3, FZD4, FZD5, FZD7, FZD8, GAS7, GATA2, GPC2, HDAC2, HIPK1, HIPK2, HOXC8, ID3, ITM2C, LDB1, LHX2, LMX1B, MAP2K1, MEF2C, MTPN, MYEF2, NGRN, NNAT, NRBP2, PCSK9, PIGT, POU3F2, POU4F2, PRKCQ, PSD, PTPRR, RTN1, RXRG, RYK, S1PR1, SHC1, SMARCA1, SOX11, STMN2, TLX1, TUBB, TUBB2A, TUBB2B, TUBB3, VHL, WNT10B, WNT11, WNT2, WNT2B, WNT3, WNT3A, WNT5A, WNT5B, WNT6, WNT7B, WNT8B, WNT9A, WNT9B                                                                                                                                                                                                                                                                                                                                                                                                                                                                                                                                                                                                                                                                                                                                                                                                                                |
| GO:0043025 | Neuronal cell body          | 195 | 12 | 0.731183 | ACCN1, ACSL4, ACVRL1, ADA, ADNP, ADORA1, ADORA2A, AGER, AKAP5, ALCAM, ALS2, AMFR, ANG, ANXA3, APC, APOE, ARG1, ASCL1, ATP2B2, ATP7A, ATXN10, BMPR1A, BMPR1B, BMPR2, BOC, BRS3, CABP1, CACNA1B, CAD, CALB1, CALCA, CALCR, CALD1, CAMK2N1, CANX, CCNG1, CCR2, CDK5, CDK5R1, CHAT, CHRM2, CHRM4, CHRNA3, CHRNA4, CHRNA5, CHRNA7, CNKSR2, CNTN2, CNTNAP2, CPLX1, CPLX2, CPNE5, CRHR1, CRIPT, CST3, CYBA, CYGB, CYP17A1, CYP19A1, DBH, DDC, DENND1A, DFNB31, DFNB59, DIXDC1, DLG2, DLG3, DLGAP3, DNER, DPYSL2, DPYSL5, DRD1, DRD4, DVL1, EEF1A2, EFHC1, EPHA5, EPHA7, ERMN, EXOC4, FABP7, FRMD7, FZD3, GABBR1, GHR, GIP, GNAT1, GNB2L1, GRIA1, GRIA4, GRIK1, GRIN3A, GRINL1A, GRK4, GRM8, HCN2, HDC, HOMER2, HRNBP3, HSPA8, HTR3B, ILK, IMPA1, INHA, ITPR3, KATNA1, KATNB1, KCNB2, KCND2, KCND3, KCNIP1, KCNJ4, KLHL17, KNDC1, LAMP1, LBXCOR1, LRP1, LRP6, MAP1S, MAP2, MBP, MET, MYH10, MYLK2, MYO10, MYO5B, NCDN, NCOA2, NEGR1, NOV, NRP1, NRSN1, NRSN2, NTRK2, OMP, P2RX3, P2RX4, P2RX6, PAFAH1B1, PCSK1, PDE1B, PEBP1, PLK3, PLXDC1, PMM1, PMM2, PPP5C, PPT1, PRPH, PSD2, PSEN1, PSEN2, PTPRF, PTPRK, PURA, RAB2A, RAC3, RARA, RTN4, S100B, SDC2, SERPINE2, SHANK2, SHROOM2, SLC18A2, SLC1A3, SLC6A3, SLC8A2, SLC8A3, SMO, SMURF1, SNAP25, SNCAIP, SNCG, SOD1, SORT1, SRD5A1, SRR, SST, STRN, STRN3, TAC1, TBX21, TGFB1, TGFB2, TGFB3, TRPV1, TSC2, TUBB4, UCHL1, UCN, ULK1, VGF, VPS16, VTI1A |
| GO:0008066 | Glutamate receptor activity | 12  | 2  | 0.743513 | GRIA1, GRIA2, GRID2, GRIK3, GRM1, GRM2, GRM3, GRM4, GRM5, GRM6, GRM7, GRM8                                                                                                                                                                                                                                                                                                                                                                                                                                                                                                                                                                                                                                                                                                                                                                                                                                                                                                                                                                                                                                                                                                                                                                                                                                                                                                                    |
| GO:0004114 | 3',5'-cyclic-nucleotide     | 16  | 2  | 0.764262 | PDE10A, PDE11A, PDE1A, PDE1C, PDE2A, PDE3B, PDE4B, PDE4C, PDE4D, PDE5A, PDE6B, PDE6D,                                                                                                                                                                                                                                                                                                                                                                                                                                                                                                                                                                                                                                                                                                                                                                                                                                                                                                                                                                                                                                                                                                                                                                                                                                                                                                         |

|            |                               |    |   |          |                                                                                                                                                                                                                                                                                                                                                                                                                        |
|------------|-------------------------------|----|---|----------|------------------------------------------------------------------------------------------------------------------------------------------------------------------------------------------------------------------------------------------------------------------------------------------------------------------------------------------------------------------------------------------------------------------------|
|            | phosphodiesterase activity    |    |   |          | PDE7B, PDE8A, PDE8B, PDE9A                                                                                                                                                                                                                                                                                                                                                                                             |
| GO:0031175 | Neuron projection development | 60 | 3 | 0.885191 | AGER, ALKBH1, APC, APP, ATG7, ATXN10, BTG2, CCDC64, CDH1, CDK5, CDK5R1, CHL1, CNTN4, CNTNAP2, DOCK7, DTNBP1, EFHD1, EPHA8, GALR2, GDNF, GNAO1, GPRIN1, HMGB1, IGF1R, IL6, L1CAM, LAMB1, LAMB2, LGI1, LINGO1, LYN, MAP2, MYH10, NCDN, NEDD4, NGF, NPY, NRTN, PHGDH, PLD2, PPP1R9A, PRICKLE2, PRMT1, PTK2B, PTPRM, RAB11A, RAC3, RASGRF1, RYK, SEPT2, SHC1, STMN3, STX3, TBC1D24, UBE4B, UCN, UHMK1, ULK1, VAPA, ZFYVE27 |

**GO Term:** Gene Ontology identifier;

**Name :** Gene Ontology name;

**Gene Number:** i) All: the total number of genes annotated by the corresponding GO gene sets; and ii) Sig: the number of genes that overlap with LD-independent MDD-associated genomic regions at a MDD meta analysis  $p$ -value  $< 5 \times 10^{-3}$ ;

**Enrichment  $p$ -value:** statistical significance of aggregated set-based association for gene sets, calculated by INRICH;

**Annotated Genes:** list of genes associated with each gene set.

**S5. Genes previously implicated in major depressive disorder****Table S5.1.** Statistics of five MDD candidate gene sets

| <b>Gene Set Source</b>          | <b>Number of Unique Candidate Genes</b> |
|---------------------------------|-----------------------------------------|
| Shyn SI et al. <sup>(3)</sup>   | 41                                      |
| Lewis CM et al. <sup>(10)</sup> | 84                                      |
| Bosker FJ et al. <sup>(9)</sup> | 57                                      |
| Muglia et al. <sup>(11)</sup>   | 15                                      |
| Wray NR et al. <sup>(7)</sup>   | 179                                     |
| All combined                    | 188                                     |

\* Shi et al. <sup>(15)</sup> also examined MDD candidate genes, but the genes were exactly same as the ones studied by Shyn SI et al., and therefore the study was not included additionally.

## **S6. Web resources**

The URLs of the web resources used in this study are as follows:

dbSNP: <http://www.ncbi.nlm.nih.gov/projects/SNP/>

Human Genome Browser: <http://genome.ucsc.edu/cgi-bin/hgGateway>

Hapmap: <http://www.hapmap.org>

OMIM: <http://www.ncbi.nlm.nih.gov/omim>

GeneCards: <http://www.genecards.org/>

PLINK: <http://pngu.mgh.harvard.edu/~purcell/plink/>

INRICH: <http://atgu.mgh.harvard.edu/inrich>

Gene Ontology: <http://www.geneontology.org>

KEGG: <http://www.genome.jp/kegg/>

Genotator: <http://genotator.hms.harvard.edu/geno/>

NHGRI GWAS Catalog: <http://www.genome.gov/gwastudies/>

STRING: <http://string-db.org/>

GRAIL: <http://www.broadinstitute.org/mpg/grail/>

## S7. Supplementary References

1. Boomsma DI, Willemsen G, Sullivan P F, Heutink P, Meijer P, Sondervan D, Klufft C, Smit G, Nolen W A, Zitman F G, Smit J H, Hoogendijk W J, van Dyck R, de Geus E J, Penninx B W. Genome-wide association of major depression: description of samples for the GAIN Major Depressive Disorder Study: NTR and NESDA biobank projects. *Eur J Hum Genet.* 2008;16(3):335-42.
2. Sullivan PF, de Geus E J, Willemsen G, James M R, Smit J H, Zandbelt T, Arolt V, Baune B T, Blackwood D, Cichon S, Coventry W L, Domschke K, Farmer A, Fava M, Gordon S D, He Q, Heath A C, Heutink P, Holsboer F, Hoogendijk W J, Hottenga J J, Hu Y, Kohli M, Lin D, Lucae S, Macintyre D J, Maier W, McGhee K A, McGuffin P, Montgomery G W, Muir W J, Nolen W A, Nöthen M M, Perlis R H, Pirlo K, Posthuma D, Rietschel M, Rizzu P, Schosser A, Smit A B, Smoller J W, Tzeng J Y, van Dyck R, Verhage M, Zitman F G, Martin N G, Wray N R, Boomsma D I, Penninx B W. Genome-wide association for major depressive disorder: a possible role for the presynaptic protein piccolo. *Mol Psychiatry* 2009;14:359-75.
3. Shyn SI, Shi J, Kraft J B, Potash J B, Knowles J A, Weissman M M, Garriock H A, Yokoyama J S, McGrath P J, Peters E J, Scheftner W A, Coryell W, Lawson W B, Jancic D, Gejman P V, Sanders A R, Holmans P, Slager SL, Levinson D F, Hamilton S P. Novel loci for major depression identified by genome-wide association study of Sequenced Treatment Alternatives to Relieve Depression and meta analysis of three studies. *Mol Psychiatry* 2011;16(2):202-15.
4. Fava M, Rush A J, Trivedi M H, Nierenberg A A, Thase M E, Sackeim H A, Quitkin F M, Wisniewski S, Lavori P W, Rosenbaum J F, Kupfer D J. Background and rationale for the sequenced treatment alternatives to relieve depression (STAR\*D) study. *Psychiatr Clin North Am.* 2003;26(2):457-94.
5. Rush AJ, Fava M, Wisniewski S R, Lavori P W, Trivedi M H, Sackeim H A, Thase M E, Nierenberg A A, Quitkin F M, Kashner T M, Kupfer D J, Rosenbaum J F, Alpert J, Stewart J W, McGrath P J, Biggs M M, Shores-Wilson K, Lebowitz B D, Ritz L, Nederehe G; STAR\*D Investigators Group. Sequenced Treatment Alternatives to Relieve Depression (STAR\*D): rationale and design. *Control Clin Trials.* 2004;25(1):119-42.
6. Sklar P, Smoller J W, Fan J, Ferreira M A, Perlis R H, Chambert K, Nimgaonkar V L, McQueen M B, Faraone S V, Kirby A, de Bakker P I, Ogdie M N, Thase M E, Sachs G S, Todd-Brown K, Gabriel S B, Sougnez C, Gates C, Blumenstiel B, Defelice M, Ardlie K G, Franklin J, Muir W J, McGhee K A, Macintyre D J, McLean A, VanBeck M, McQuillin A, Bass N J, Robinson M, Lawrence J, Anjorin A, Curtis D, Scolnick E M, Daly M J, Blackwood D H, Gurling H M, Purcell S M. Whole-genome association study of bipolar disorder. *Mol Psychiatry.* 2008;13:558-69.
7. Wray NR, Pergadia M L, Blackwood D H, Penninx B W, Gordon S D, Nyholt D R, Ripke S, Macintyre D J, McGhee K A, Maclean A W, Smit J H, Hottenga J J, Willemsen G, Middeldorp C M, de Geus E J, Lewis C M, McGuffin P, Hickie I B, van den Oord E J, Liu J Z, Macgregor S, McEvoy B P, Byrne E M, Medland S E, Statham D J, Henders A K, Heath A C, Montgomery G W, Martin N G, Boomsma D I, Madden P A, Sullivan P F. Genome-wide association study of major depressive disorder: new results, meta-analysis, and lessons learned. *Mol Psychiatry.* 2012;17(1):36-48.
8. Medland SE, Nyholt DR, Painter JN, McEvoy BP, McRae AF, Zhu G, et al. Common variants in the trichohyalin gene are associated with straight hair in Europeans. *Am J Hum Genet.* 2009 Nov;85(5):750-5.
9. Bosker FJ, Hartman C A, Nolte I M, Prins B P, Terpstra P, Posthuma D, van Veen T, Willemsen G, DeRijk R H, de Geus E J, Hoogendijk W J, Sullivan P F, Penninx B W, Boomsma D I, Snieder H, Nolen W A. Poor replication of candidate genes for major depressive disorder using genome-wide association data. *Mol Psychiatry.* 2011;16(5):516-32.

10. Lewis CM, Ng M Y, Butler A W, Cohen-Woods S, Uher R, Pirlo K, Weale M E, Schosser A, Paredes U M, Rivera M, Craddock N, Owen M J, Jones L, Jones I, Korszun A, Aitchison K J, Shi J, Quinn J P, Mackenzie A, Vollenweider P, Waeber G, Heath S, Lathrop M, Muglia P, Barnes M R, Whittaker J C, Tozzi F, Holsboer F, Preisig M, Farmer A E, Breen G, Craig I W, McGuffin P. Genome-wide association study of major recurrent depression in the U.K. population. *Am J Psychiatry* 2010;167(8):949-57.
11. Muglia P, Tozzi F, Galwey N W, Francks C, Upmanyu R, Kong X Q, Antoniadou A, Domenici E, Perry J, Rothen S, Vandeleur C L, Mooser V, Waeber G, Vollenweider P, Preisig M, Lucae S, Müller-Miyhok B, Holsboer F, Middleton L T, Roses AD. Genome-wide association study of recurrent major depressive disorder in two European case-control cohorts. *Mol Psychiatry*. 2010;15:589-601.
12. Lee PH, O'Dushlaine C, Thomas B, Purcell SM. INRICH: Interval-based Enrichment Analysis for Genome Wide Association Studies. In Press. 2011.
13. Veyrieras JB, Kudaravalli S, Kim S Y, Dermitzakis E T, Gilad Y, Stephens M, Pritchard J K. High-resolution mapping of expression-QTLs yields insight into human gene regulation. *PLoS Genet*. 2008;4:e1000214.
14. Dreszer TR, Karolchik D, Zweig A S, Hinrichs A S, Raney B J, Kuhn R M, Meyer L R, Wong M, Sloan C A, Rosenbloom K R, Roe G, Rhead B, Pohl A, Malladi V S, Li C H, Learned K, Kirkup V, Hsu F, Harte R A, Guruvadoo L, Goldman M, Giardine B M, Fujita P A, Diekhans M, Cline M S, Clawson H, Barber G P, Haussler D, James Kent W. The UCSC Genome Browser database: update 2011. *Nucleic Acids Res* 2011;39(Database issue):D876-82.
15. Shi J, Potash J B, Knowles J A, Weissman M M, Coryell W, Scheftner W A, Lawson W B, DePaulo JR Jr, Gejman P V, Sanders A R, Johnson J K, Adams P, Chaudhury S, Jancic D, Evgrafov O, Zvinyatskovskiy A, Ertman N, Gladis M, Neimanas K, Goodell M, Hale N, Ney N, Verma R, Mirel D, Holmans P, Levinson D F. Genome-wide association study of recurrent early-onset major depressive disorder. *Mol Psychiatry* 2011;16(2):193-201.
